# Supplementary material for: Do preferences for charitable giving help auctioneers?
Source: Springer Nature journal article supplement (doi:10.1007/s10683-009-9227-7), 2009-10-02
Supplement: MOESM1 [file 10683_2009_9227_MOESM1_ESM.xlsx]

## Sheet: Session1_FP_StandardPool
SessionID	AucType	Period	Subject	Group	Profit	TotalProfit	bankrpt	balance	bid	charity	draw	donation	earned	price	tie	value	vlink	win	winch	Chround	CharityDummy
1	1	1	1	2	0	0	0	100	55	2	-1	0	0	57	0	70.69	1	0	-1	0	0
1	1	1	2	5	0	0	0	100	5	3	-1	0	0	38.52	0	7.08	1	0	-1	0	0
1	1	1	3	4	0	0	0	100	6	2	-1	0	0	53	0	7.5	1	0	-1	0	0
1	1	1	4	5	0	0	0	100	10	3	-1	0	0	38.52	0	11.25	1	0	-1	0	0
1	1	1	5	2	0	0	0	142.38	57	2	-1	0	42.38	57	0	99.38	1	1	-1	0	0
1	1	1	6	3	0	0	0	100	25	1	-1	0	0	30	0	27.29	1	0	-1	0	0
1	1	1	7	1	0	0	0	100	14	2	-1	0	0	75.5	0	27.8	1	0	-1	0	0
1	1	1	8	1	0	0	0	114.33	75.5	4	-1	0	14.33	75.5	0	89.83	1	1	-1	0	0
1	1	1	9	5	0	0	0	104	38.52	3	-1	0	4	38.52	0	42.52	1	1	-1	0	0
1	1	1	10	4	0	0	0	100	18	3	-1	0	0	53	0	19.31	1	0	-1	0	0
1	1	1	11	3	0	0	0	100	15.94	1	-1	0	0	30	0	24.94	1	0	-1	0	0
1	1	1	12	3	0	0	0	101.28	30	2	-1	0	1.28	30	0	31.28	1	1	-1	0	0
1	1	1	13	4	0	0	0	100.66	53	1	-1	0	0.66	53	0	53.66	1	1	-1	0	0
1	1	1	14	1	0	0	0	100	60	2	-1	0	0	75.5	0	73.08	1	0	-1	0	0
1	1	1	15	3	0	0	0	100	14.02	3	-1	0	0	30	0	15.46	1	0	-1	0	0
1	1	1	16	1	0	0	0	100	50.5	3	-1	0	0	75.5	0	64.17	1	0	-1	0	0
1	1	1	17	5	0	0	0	100	20.01	2	-1	0	0	38.52	0	27.01	1	0	-1	0	0
1	1	1	18	2	0	0	0	100	15	3	-1	0	0	57	0	20.54	1	0	-1	0	0
1	1	1	19	2	0	0	0	100	25	3	-1	0	0	57	0	31.42	1	0	-1	0	0
1	1	1	20	4	0	0	0	100	13.54	1	-1	0	0	53	0	16	1	0	-1	0	0
1	1	2	1	2	0	0	0	100	20	2	-1	0	0	40	0	23.3	2	0	-1	0	0
1	1	2	2	5	0	0	0	119.2	65	3	-1	0	19.2	65	0	84.2	2	1	-1	0	0
1	1	2	3	4	0	0	0	100	14	2	-1	0	0	69	0	17.69	2	0	-1	0	0
1	1	2	4	5	0	0	0	100	1.89	3	-1	0	0	65	0	2.89	2	0	-1	0	0
1	1	2	5	2	0	0	0	142.38	11	2	-1	0	0	40	0	17.08	2	0	-1	0	0
1	1	2	6	3	0	0	0	100	60	1	-1	0	0	70	0	97.59	2	0	-1	0	0
1	1	2	7	1	0	0	0	100	14	2	-1	0	0	15	0	22.59	2	0	-1	0	0
1	1	2	8	1	0	0	0	114.33	10	4	-1	0	0	15	0	22.08	2	0	-1	0	0
1	1	2	9	5	0	0	0	104	50	3	-1	0	0	65	0	58.48	2	0	-1	0	0
1	1	2	10	4	0	0	0	100	42	3	-1	0	0	69	0	54.45	2	0	-1	0	0
1	1	2	11	3	0	0	0	115.44	70	1	-1	0	15.44	70	0	85.44	2	1	-1	0	0
1	1	2	12	3	0	0	0	101.28	25	2	-1	0	0	70	0	28.91	2	0	-1	0	0
1	1	2	13	4	0	0	0	101.08	69	1	-1	0	0.419998	69	0	69.42	2	1	-1	0	0
1	1	2	14	1	0	0	0	100.36	15	2	-1	0	0.36	15	0	15.36	2	1	-1	0	0
1	1	2	15	3	0	0	0	100	60.02	3	-1	0	0	70	0	72.27	2	0	-1	0	0
1	1	2	16	1	0	0	0	100	7.5	3	-1	0	0	15	0	9.32	2	0	-1	0	0
1	1	2	17	5	0	0	0	100	20.63	2	-1	0	0	65	0	28.63	2	0	-1	0	0
1	1	2	18	2	0	0	0	100	10	3	-1	0	0	40	0	25.81	2	0	-1	0	0
1	1	2	19	2	0	0	0	108.4	40	3	-1	0	8.4	40	0	48.4	2	1	-1	0	0
1	1	2	20	4	0	0	0	100	4.56	1	-1	0	0	69	0	5.29	2	0	-1	0	0
1	1	3	1	2	0	0	0	100	15	2	-1	0	0	50	0	18.87	3	0	-1	0	0
1	1	3	2	5	0	0	0	119.2	49.44	3	-1	0	0	80.73	0	61.44	3	0	-1	0	0
1	1	3	3	4	0	0	0	100	72	2	-1	0	0	88	0	91.18	3	0	-1	0	0
1	1	3	4	5	0	0	0	100	40.01	3	-1	0	0	80.73	0	45.22	3	0	-1	0	0
1	1	3	5	2	0	0	0	142.38	50	2	-1	0	0	50	1	72.08	3	0	-1	0	0
1	1	3	6	3	0	0	0	100	50.01	1	-1	0	0	75	0	57.38	3	0	-1	0	0
1	1	3	7	1	0	0	0	100	66	2	-1	0	0	73.77	0	96.05	3	0	-1	0	0
1	1	3	8	1	0	0	0	114.33	35.1	4	-1	0	0	73.77	0	40.3	3	0	-1	0	0
1	1	3	9	5	0	0	0	118	80.73	3	-1	0	14	80.73	0	94.73	3	1	-1	0	0
1	1	3	10	4	0	0	0	100	60.01	3	-1	0	0	88	0	67.61	3	0	-1	0	0
1	1	3	11	3	0	0	0	137.43	75	1	-1	0	21.99	75	0	96.99	3	1	-1	0	0
1	1	3	12	3	0	0	0	101.28	60	2	-1	0	0	75	0	81.41	3	0	-1	0	0
1	1	3	13	4	0	0	0	101.46	88	1	-1	0	0.379997	88	0	88.38	3	1	-1	0	0
1	1	3	14	1	0	0	0	110.36	73.77	2	-1	0	10	73.77	0	83.77	3	1	-1	0	0
1	1	3	15	3	0	0	0	100	28.02	3	-1	0	0	75	0	29.16	3	0	-1	0	0
1	1	3	16	1	0	0	0	100	29.9	3	-1	0	0	73.77	0	40.5	3	0	-1	0	0
1	1	3	17	5	0	0	0	100	66.12	2	-1	0	0	80.73	0	86.12	3	0	-1	0	0
1	1	3	18	2	0	0	0	100	40	3	-1	0	0	50	0	51.7	3	0	-1	0	0
1	1	3	19	2	0	0	0	119.94	50	3	-1	0	11.54	50	1	61.54	3	1	-1	0	0
1	1	3	20	4	0	0	0	100	33.21	1	-1	0	0	88	0	36.08	3	0	-1	0	0
1	1	4	1	2	0	0	0	100	60	2	-1	0	0	65	0	88.76	4	0	-1	0	0
1	1	4	2	5	0	0	0	119.2	64.77	3	-1	0	0	76.9	0	74.77	4	0	-1	0	0
1	1	4	3	4	0	0	0	100	33	2	-1	0	0	88	0	38.85	4	0	-1	0	0
1	1	4	4	5	0	0	0	110	76.9	3	-1	0	10	76.9	0	86.9	4	1	-1	0	0
1	1	4	5	2	0	0	0	142.38	50.07	2	-1	0	0	65	0	73.62	4	0	-1	0	0
1	1	4	6	3	0	0	0	100	40.01	1	-1	0	0	50	0	45.01	4	0	-1	0	0
1	1	4	7	1	0	0	0	100	5	2	-1	0	0	45.3	0	8.08	4	0	-1	0	0
1	1	4	8	1	0	0	0	122.33	45.3	4	-1	0	8	45.3	0	53.3	4	1	-1	0	0
1	1	4	9	5	0	0	0	118	4.67	3	-1	0	0	76.9	0	5.67	4	0	-1	0	0
1	1	4	10	4	0	0	0	100	72.01	3	-1	0	0	88	0	84.29	4	0	-1	0	0
1	1	4	11	3	0	0	0	142.63	50	1	-1	0	5.2	50	0	55.2	4	1	-1	0	0
1	1	4	12	3	0	0	0	101.28	0.01	2	-1	0	0	50	0	0.15	4	0	-1	0	0
1	1	4	13	4	0	0	0	102	88	1	-1	0	0.540001	88	0	88.54	4	1	-1	0	0
1	1	4	14	1	0	0	0	110.36	30	2	-1	0	0	45.3	0	40.69	4	0	-1	0	0
1	1	4	15	3	0	0	0	100	44.02	3	-1	0	0	50	0	49.67	4	0	-1	0	0
1	1	4	16	1	0	0	0	100	40	3	-1	0	0	45.3	0	49.36	4	0	-1	0	0
1	1	4	17	5	0	0	0	100	31	2	-1	0	0	76.9	0	36	4	0	-1	0	0
1	1	4	18	2	0	0	0	127.55	65	3	-1	0	27.55	65	0	92.55	4	1	-1	0	0
1	1	4	19	2	0	0	0	119.94	20	3	-1	0	0	65	0	27.67	4	0	-1	0	0
1	1	4	20	4	0	0	0	100	42.58	1	-1	0	0	88	0	46.7	4	0	-1	0	0
1	1	5	1	2	0	0	0	100	25	2	-1	0	0	65	0	26.26	5	0	-1	0	0
1	1	5	2	5	0	0	0	119.2	39.59	3	-1	0	0	74.48	0	45.59	5	0	-1	0	0
1	1	5	3	4	0	0	0	100	40.5	2	-1	0	0	84.01	0	45.4	5	0	-1	0	0
1	1	5	4	5	0	0	0	110	25	3	-1	0	0	74.48	0	28.59	5	0	-1	0	0
1	1	5	5	2	0	0	0	142.38	0.57	2	-1	0	0	65	0	0.58	5	0	-1	0	0
1	1	5	6	3	0	0	0	100	32.88	1	-1	0	0	70	0	42.88	5	0	-1	0	0
1	1	5	7	1	0	0	0	100	5	2	-1	0	0	55.2	0	14.91	5	0	-1	0	0
1	1	5	8	1	0	0	0	131.98	55.2	4	-1	0	9.65	55.2	0	64.85	5	1	-1	0	0
1	1	5	9	5	0	0	0	118	19.36	3	-1	0	0	74.48	0	21.36	5	0	-1	0	0
1	1	5	10	4	0	0	0	100	81.01	3	-1	0	0	84.01	0	97.46	5	0	-1	0	0
1	1	5	11	3	0	0	0	142.63	54.95	1	-1	0	0	70	0	69.95	5	0	-1	0	0
1	1	5	12	3	0	0	0	123	70	2	-1	0	21.72	70	0	91.72	5	1	-1	0	0
1	1	5	13	4	0	0	0	102	0	1	-1	0	0	84.01	0	8.95	5	0	-1	0	0
1	1	5	14	1	0	0	0	110.36	55	2	-1	0	0	55.2	0	66.51	5	0	-1	0	0
1	1	5	15	3	0	0	0	100	67.02	3	-1	0	0	70	0	71.41	5	0	-1	0	0
1	1	5	16	1	0	0	0	100	20.5	3	-1	0	0	55.2	0	23.88	5	0	-1	0	0
1	1	5	17	5	0	0	0	120	74.48	2	-1	0	20	74.48	0	94.48	5	1	-1	0	0
1	1	5	18	2	0	0	0	127.55	10	3	-1	0	0	65	0	20.25	5	0	-1	0	0
1	1	5	19	2	0	0	0	134.61	65	3	-1	0	14.67	65	0	79.67	5	1	-1	0	0
1	1	5	20	4	0	0	0	103.11	84.01	1	-1	0	3.11	84.01	0	87.12	5	1	-1	0	0
1	1	6	1	2	0	0	0	100	45	2	-1	0	0	50	0	47.03	15	0	3	1	1
1	1	6	2	5	0	0	0	119.2	55.86	3	-1	0	0	76	0	71.06	15	0	3	1	1
1	1	6	3	4	0	0	0	100	70	2	-1	0	0	73.99	0	78.28	15	0	1	1	1
1	1	6	4	5	0	0	0	110	50.35	3	-1	0	0	76	0	60.35	15	0	3	1	1
1	1	6	5	2	0	0	0	142.38	40	2	-1	0	0	50	0	61.57	15	0	3	1	1
1	1	6	6	3	0	0	0	100	2.36	1	-1	0	0	90	0	2.36	15	0	1	1	1
1	1	6	7	1	0	0	0	100	41	2	-1	0	0	60	0	60.5	15	0	4	1	1
1	1	6	8	1	0	0	0	142.3	60	4	-1	0	10.32	60	0	70.32	15	1	4	1	0
1	1	6	9	5	0	0	0	122.99	76	3	-1	76	4.99	76	0	80.99	15	1	3	1	1
1	1	6	10	4	0	0	0	100	27.01	3	-1	0	0	73.99	0	28.57	15	0	1	1	1
1	1	6	11	3	0	0	0	143.21	90	1	-1	90	0.580002	90	0	90.58	15	1	1	1	1
1	1	6	12	3	0	0	0	123	60	2	-1	0	0	90	0	83.77	15	0	1	1	1
1	1	6	13	4	0	0	0	102	70	1	-1	0	0	73.99	0	91.74	15	0	1	1	1
1	1	6	14	1	0	0	0	110.36	1	2	-1	0	0	60	0	1.98	15	0	4	1	1
1	1	6	15	3	0	0	0	100	22.52	3	-1	0	0	90	0	22.52	15	0	1	1	1
1	1	6	16	1	0	0	0	100	40	3	-1	0	0	60	0	43.61	15	0	4	1	1
1	1	6	17	5	0	0	0	120	30.41	2	-1	0	0	76	0	34.41	15	0	3	1	1
1	1	6	18	2	0	0	0	141.57	50	3	-1	50	14.02	50	0	64.02	15	1	3	1	1
1	1	6	19	2	0	0	0	134.61	40	3	-1	0	0	50	0	51.33	15	0	3	1	1
1	1	6	20	4	0	0	0	107.12	73.99	1	-1	73.99	4.01	73.99	0	78	15	1	1	1	1
1	1	7	1	2	0	0	0	100	20	2	-1	0	0	50	0	22.78	16	0	2	1	1
1	1	7	2	5	0	0	0	119.2	20.99	3	-1	0	0	52.25	0	25.38	16	0	3	1	1
1	1	7	3	4	0	0	0	100	42	2	-1	0	0	91.89	0	44.99	16	0	1	1	1
1	1	7	4	5	0	0	0	110	10	3	-1	0	0	52.25	0	17.35	16	0	3	1	1
1	1	7	5	2	0	0	0	188.14	50	2	-1	50	45.76	50	0	95.76	16	1	2	1	1
1	1	7	6	3	0	0	0	100	62.06	1	-1	62.06	0	62.06	0	62.06	16	1	1	1	1
1	1	7	7	1	0	0	0	137.23	44	2	-1	44	37.23	44	0	81.23	16	1	2	1	1
1	1	7	8	1	0	0	0	142.3	36	4	-1	0	0	44	0	43.25	16	0	2	1	0
1	1	7	9	5	0	0	0	124.99	52.25	3	-1	128.25	2	52.25	0	54.25	16	1	3	1	1
1	1	7	10	4	0	0	0	100	38.01	3	-1	0	0	91.89	0	40.92	16	0	1	1	1
1	1	7	11	3	0	0	0	143.21	25.47	1	-1	90	0	62.06	0	25.47	16	0	1	1	1
1	1	7	12	3	0	0	0	123	30	2	-1	0	0	62.06	0	35.24	16	0	1	1	1
1	1	7	13	4	0	0	0	102	69	1	-1	0	0	91.89	0	69.95	16	0	1	1	1
1	1	7	14	1	0	0	0	110.36	15.85	2	-1	0	0	44	0	23.85	16	0	2	1	1
1	1	7	15	3	0	0	0	100	49.15	3	-1	0	0	62.06	0	49.15	16	0	1	1	1
1	1	7	16	1	0	0	0	100	35	3	-1	0	0	44	0	38.08	16	0	2	1	1
1	1	7	17	5	0	0	0	120	41.36	2	-1	0	0	52.25	0	46.36	16	0	3	1	1
1	1	7	18	2	0	0	0	141.57	35	3	-1	50	0	50	0	41.44	16	0	2	1	1
1	1	7	19	2	0	0	0	134.61	45	3	-1	0	0	50	0	53.37	16	0	2	1	1
1	1	7	20	4	0	0	0	112.79	91.89	1	-1	165.88	5.67	91.89	0	97.56	16	1	1	1	1
1	1	8	1	2	0	0	0	100	15	2	-1	0	0	52	0	18.87	3	0	2	1	1
1	1	8	2	5	0	0	0	119.2	55.84	3	-1	0	0	81.73	0	61.44	3	0	3	1	1
1	1	8	3	4	0	0	0	102.58	88.6	2	-1	88.6	2.58	88.6	0	91.18	3	1	2	1	1
1	1	8	4	5	0	0	0	110	40	3	-1	0	0	81.73	0	45.22	3	0	3	1	1
1	1	8	5	2	0	0	0	208.22	52	2	-1	102	20.08	52	0	72.08	3	1	2	1	1
1	1	8	6	3	0	0	0	100	57.38	1	-1	62.06	0	90	0	57.38	3	0	1	1	1
1	1	8	7	1	0	0	0	137.23	55	2	-1	44	0	75.5	0	96.05	3	0	2	1	1
1	1	8	8	1	0	0	0	142.3	35.3	4	-1	0	0	75.5	0	40.3	3	0	2	1	0
1	1	8	9	5	0	0	0	137.99	81.73	3	-1	209.98	13	81.73	0	94.73	3	1	3	1	1
1	1	8	10	4	0	0	0	100	66	3	-1	0	0	88.6	0	67.61	3	0	2	1	1
1	1	8	11	3	0	0	0	150.2	90	1	-1	180	6.99	90	0	96.99	3	1	1	1	1
1	1	8	12	3	0	0	0	123	65	2	-1	0	0	90	0	81.41	3	0	1	1	1
1	1	8	13	4	0	0	0	102	88	1	-1	0	0	88.6	0	88.38	3	0	2	1	1
1	1	8	14	1	0	0	0	118.63	75.5	2	-1	75.5	8.27	75.5	0	83.77	3	1	2	1	1
1	1	8	15	3	0	0	0	100	29.16	3	-1	0	0	90	0	29.16	3	0	1	1	1
1	1	8	16	1	0	0	0	100	35	3	-1	0	0	75.5	0	40.5	3	0	2	1	1
1	1	8	17	5	0	0	0	120	71.12	2	-1	0	0	81.73	0	86.12	3	0	3	1	1
1	1	8	18	2	0	0	0	141.57	40	3	-1	50	0	52	0	51.7	3	0	2	1	1
1	1	8	19	2	0	0	0	134.61	50	3	-1	0	0	52	0	61.54	3	0	2	1	1
1	1	8	20	4	0	0	0	112.79	30.99	1	-1	165.88	0	88.6	0	36.08	3	0	2	1	1
1	1	9	1	2	0	0	0	100	10	2	-1	0	0	62	0	12.66	14	0	3	1	1
1	1	9	2	5	0	0	0	119.2	65.99	3	-1	0	0	79.61	0	79.7	14	0	3	1	1
1	1	9	3	4	0	0	0	102.58	43.9	2	-1	88.6	0	90.01	0	45.9	14	0	3	1	1
1	1	9	4	5	0	0	0	110	20	3	-1	0	0	79.61	0	23.81	14	0	3	1	1
1	1	9	5	2	0	0	0	208.22	52	2	-1	102	0	62	0	82.86	14	0	3	1	1
1	1	9	6	3	0	0	0	100	18.4	1	-1	62.06	0	70.18	0	18.4	14	0	1	1	1
1	1	9	7	1	0	0	0	137.23	16	2	-1	44	0	70	0	32.15	14	0	3	1	1
1	1	9	8	1	0	0	0	142.3	30.63	4	-1	0	0	70	0	37.63	14	0	3	1	0
1	1	9	9	5	0	0	0	151.99	79.61	3	-1	289.59	14	79.61	0	93.61	14	1	3	1	1
1	1	9	10	4	0	0	0	109.35	90.01	3	-1	90.01	9.35	90.01	0	99.36	14	1	3	1	1
1	1	9	11	3	0	0	0	167.2	70.18	1	-1	250.18	17	70.18	0	87.18	14	1	1	1	1
1	1	9	12	3	0	0	0	123	70	2	-1	0	0	70.18	0	88.19	14	0	1	1	1
1	1	9	13	4	0	0	0	102	31.22	1	-1	0	0	90.01	0	31.22	14	0	3	1	1
1	1	9	14	1	0	0	0	118.63	5	2	-1	75.5	0	70	0	8.16	14	0	3	1	1
1	1	9	15	3	0	0	0	100	29.17	3	-1	0	0	70.18	0	29.17	14	0	1	1	1
1	1	9	16	1	0	0	0	109.04	70	3	-1	70	9.04	70	0	79.04	14	1	3	1	1
1	1	9	17	5	0	0	0	120	5.28	2	-1	0	0	79.61	0	5.28	14	0	3	1	1
1	1	9	18	2	0	0	0	175.85	62	3	-1	112	34.28	62	0	96.28	14	1	3	1	1
1	1	9	19	2	0	0	0	134.61	30	3	-1	0	0	62	0	33.83	14	0	3	1	1
1	1	9	20	4	0	0	0	112.79	84.22	1	-1	165.88	0	90.01	0	92.25	14	0	3	1	1
1	1	10	1	2	0	0	0	110.69	60	2	-1	60	10.69	60	0	70.69	1	1	2	1	1
1	1	10	2	5	0	0	0	119.2	7.08	3	-1	0	0	40.52	0	7.08	1	0	3	1	1
1	1	10	3	4	0	0	0	102.58	7	2	-1	88.6	0	53.66	0	7.5	1	0	1	1	1
1	1	10	4	5	0	0	0	110	10	3	-1	0	0	40.52	0	11.25	1	0	3	1	1
1	1	10	5	2	0	0	0	208.22	57	2	-1	102	0	60	0	99.38	1	0	2	1	1
1	1	10	6	3	0	0	0	100	27.29	1	-1	62.06	0	30	0	27.29	1	0	2	1	1
1	1	10	7	1	0	0	0	137.23	5	2	-1	44	0	75.83	0	27.8	1	0	4	1	1
1	1	10	8	1	0	0	0	156.3	75.83	4	-1	0	14	75.83	0	89.83	1	1	4	1	0
1	1	10	9	5	0	0	0	153.99	40.52	3	-1	330.11	2	40.52	0	42.52	1	1	3	1	1
1	1	10	10	4	0	0	0	109.35	19.01	3	-1	90.01	0	53.66	0	19.31	1	0	1	1	1
1	1	10	11	3	0	0	0	167.2	24.94	1	-1	250.18	0	30	0	24.94	1	0	2	1	1
1	1	10	12	3	0	0	0	124.28	30	2	-1	30	1.28	30	0	31.28	1	1	2	1	1
1	1	10	13	4	0	0	0	102	53.66	1	-1	53.66	0	53.66	0	53.66	1	1	1	1	1
1	1	10	14	1	0	0	0	118.63	65.5	2	-1	75.5	0	75.83	0	73.08	1	0	4	1	1
1	1	10	15	3	0	0	0	100	15.02	3	-1	0	0	30	0	15.46	1	0	2	1	1
1	1	10	16	1	0	0	0	109.04	60	3	-1	70	0	75.83	0	64.17	1	0	4	1	1
1	1	10	17	5	0	0	0	120	22.01	2	-1	0	0	40.52	0	27.01	1	0	3	1	1
1	1	10	18	2	0	0	0	175.85	10	3	-1	112	0	60	0	20.54	1	0	2	1	1
1	1	10	19	2	0	0	0	134.61	30	3	-1	0	0	60	0	31.42	1	0	2	1	1
1	1	10	20	4	0	0	0	112.79	15	1	-1	165.88	0	53.66	0	16	1	0	1	1	1
1	1	11	1	2	0	0	0	110.69	35	2	-1	60	0	50	0	39.13	11	0	-1	0	0
1	1	11	2	5	0	0	0	119.2	20.99	3	-1	0	0	70.01	0	25.84	11	0	-1	0	0
1	1	11	3	4	0	0	0	107.12	76	2	-1	88.6	4.54	76	0	80.54	11	1	-1	0	0
1	1	11	4	5	0	0	0	125.4	70.01	3	-1	0	15.4	70.01	0	85.41	11	1	-1	0	0
1	1	11	5	2	0	0	0	208.22	1	2	-1	102	0	50	0	4.07	11	0	-1	0	0
1	1	11	6	3	0	0	0	100	20.39	1	-1	62.06	0	68.02	0	24.39	11	0	-1	0	0
1	1	11	7	1	0	0	0	137.23	16	2	-1	44	0	45.5	0	45.29	11	0	-1	0	0
1	1	11	8	1	0	0	0	156.3	15.41	4	-1	0	0	45.5	0	20.41	11	0	-1	0	0
1	1	11	9	5	0	0	0	153.99	9	3	-1	330.11	0	70.01	0	9.21	11	0	-1	0	0
1	1	11	10	4	0	0	0	109.35	8.01	3	-1	90.01	0	76	0	8.21	11	0	-1	0	0
1	1	11	11	3	0	0	0	167.2	30.21	1	-1	250.18	0	68.02	0	36.21	11	0	-1	0	0
1	1	11	12	3	0	0	0	124.28	53.33	2	-1	30	0	68.02	0	66.73	11	0	-1	0	0
1	1	11	13	4	0	0	0	102	0	1	-1	53.66	0	76	0	13.51	11	0	-1	0	0
1	1	11	14	1	0	0	0	131.17	45.5	2	-1	75.5	12.54	45.5	0	58.04	11	1	-1	0	0
1	1	11	15	3	0	0	0	111.55	68.02	3	-1	0	11.55	68.02	0	79.57	11	1	-1	0	0
1	1	11	16	1	0	0	0	109.04	19.8	3	-1	70	0	45.5	0	21.85	11	0	-1	0	0
1	1	11	17	5	0	0	0	120	2.34	2	-1	0	0	70.01	0	2.34	11	0	-1	0	0
1	1	11	18	2	0	0	0	175.85	10	3	-1	112	0	50	0	15.93	11	0	-1	0	0
1	1	11	19	2	0	0	0	141.24	50	3	-1	0	6.63	50	0	56.63	11	1	-1	0	0
1	1	11	20	4	0	0	0	112.79	13.44	1	-1	165.88	0	76	0	15.07	11	0	-1	0	0
1	1	12	1	2	0	0	0	110.69	40	2	-1	60	0	70	0	50.15	12	0	-1	0	0
1	1	12	2	5	0	0	0	129.5	79.88	3	-1	0	10.3	79.88	0	90.18	12	1	-1	0	0
1	1	12	3	4	0	0	0	107.12	1.5	2	-1	88.6	0	83.66	0	1.76	12	0	-1	0	0
1	1	12	4	5	0	0	0	125.4	50.32	3	-1	0	0	79.88	0	57.36	12	0	-1	0	0
1	1	12	5	2	0	0	0	208.22	30	2	-1	102	0	70	0	34.8	12	0	-1	0	0
1	1	12	6	3	0	0	0	100	20.83	1	-1	62.06	0	62.01	0	33.83	12	0	-1	0	0
1	1	12	7	1	0	0	0	137.23	1	2	-1	44	0	77	0	9.63	12	0	-1	0	0
1	1	12	8	1	0	0	0	156.3	60.24	4	-1	0	0	77	0	66.24	12	0	-1	0	0
1	1	12	9	5	0	0	0	153.99	33.63	3	-1	330.11	0	79.88	0	36.63	12	0	-1	0	0
1	1	12	10	4	0	0	0	109.35	25	3	-1	90.01	0	83.66	0	26.28	12	0	-1	0	0
1	1	12	11	3	0	0	0	167.2	35.74	1	-1	250.18	0	62.01	0	40.74	12	0	-1	0	0
1	1	12	12	3	0	0	0	134.5	62.01	2	-1	30	10.22	62.01	0	72.23	12	1	-1	0	0
1	1	12	13	4	0	0	0	102	67	1	-1	53.66	0	83.66	0	69.39	12	0	-1	0	0
1	1	12	14	1	0	0	0	151.27	77	2	-1	75.5	20.1	77	0	97.1	12	1	-1	0	0
1	1	12	15	3	0	0	0	111.55	30.02	3	-1	0	0	62.01	0	32.6	12	0	-1	0	0
1	1	12	16	1	0	0	0	109.04	51	3	-1	70	0	77	0	58.95	12	0	-1	0	0
1	1	12	17	5	0	0	0	120	67.51	2	-1	0	0	79.88	0	77.51	12	0	-1	0	0
1	1	12	18	2	0	0	0	175.85	10	3	-1	112	0	70	0	17.34	12	0	-1	0	0
1	1	12	19	2	0	0	0	160.69	70	3	-1	0	19.45	70	0	89.45	12	1	-1	0	0
1	1	12	20	4	0	0	0	117.4	83.66	1	-1	165.88	4.60999	83.66	0	88.27	12	1	-1	0	0
1	1	13	1	2	0	0	0	137.77	62	2	-1	60	27.08	62	0	89.08	13	1	-1	0	0
1	1	13	2	5	0	0	0	129.5	48.99	3	-1	0	0	52.71	0	55.69	13	0	-1	0	0
1	1	13	3	4	0	0	0	107.12	3	2	-1	88.6	0	75	0	3.27	13	0	-1	0	0
1	1	13	4	5	0	0	0	125.4	30	3	-1	0	0	52.71	0	33.15	13	0	-1	0	0
1	1	13	5	2	0	0	0	208.22	50.01	2	-1	102	0	62	0	57.08	13	0	-1	0	0
1	1	13	6	3	0	0	0	100	50.04	1	-1	62.06	0	80.81	0	61.04	13	0	-1	0	0
1	1	13	7	1	0	0	0	137.23	26	2	-1	44	0	65.84	0	51.09	13	0	-1	0	0
1	1	13	8	1	0	0	0	156.3	25.19	4	-1	0	0	65.84	0	32.19	13	0	-1	0	0
1	1	13	9	5	0	0	0	158.99	52.71	3	-1	330.11	5	52.71	0	57.71	13	1	-1	0	0
1	1	13	10	4	0	0	0	109.35	15	3	-1	90.01	0	75	0	15.48	13	0	-1	0	0
1	1	13	11	3	0	0	0	179.2	80.81	1	-1	250.18	12	80.81	0	92.81	13	1	-1	0	0
1	1	13	12	3	0	0	0	134.5	20	2	-1	30	0	80.81	0	20.4	13	0	-1	0	0
1	1	13	13	4	0	0	0	103.77	75	1	-1	53.66	1.77	75	0	76.77	13	1	-1	0	0
1	1	13	14	1	0	0	0	162.27	65.84	2	-1	75.5	11	65.84	0	76.84	13	1	-1	0	0
1	1	13	15	3	0	0	0	111.55	11.02	3	-1	0	0	80.81	0	11.26	13	0	-1	0	0
1	1	13	16	1	0	0	0	109.04	50	3	-1	70	0	65.84	0	55.43	13	0	-1	0	0
1	1	13	17	5	0	0	0	120	33.8	2	-1	0	0	52.71	0	38.8	13	0	-1	0	0
1	1	13	18	2	0	0	0	175.85	60	3	-1	112	0	62	0	77.59	13	0	-1	0	0
1	1	13	19	2	0	0	0	160.69	10	3	-1	0	0	62	0	11.83	13	0	-1	0	0
1	1	13	20	4	0	0	0	117.4	1.25	1	-1	165.88	0	75	0	2.09	13	0	-1	0	0
1	1	14	1	2	0	0	0	137.77	10	2	-1	60	0	62.01	0	12.66	14	0	-1	0	0
1	1	14	2	5	0	0	0	129.5	68.99	3	-1	0	0	81.6	0	79.7	14	0	-1	0	0
1	1	14	3	4	0	0	0	107.12	39.5	2	-1	88.6	0	88.01	0	45.9	14	0	-1	0	0
1	1	14	4	5	0	0	0	125.4	20	3	-1	0	0	81.6	0	23.81	14	0	-1	0	0
1	1	14	5	2	0	0	0	208.22	56	2	-1	102	0	62.01	0	82.86	14	0	-1	0	0
1	1	14	6	3	0	0	0	100	18.4	1	-1	62.06	0	75.25	0	18.4	14	0	-1	0	0
1	1	14	7	1	0	0	0	137.23	14	2	-1	44	0	70	0	32.15	14	0	-1	0	0
1	1	14	8	1	0	0	0	156.3	31.63	4	-1	0	0	70	0	37.63	14	0	-1	0	0
1	1	14	9	5	0	0	0	171	81.6	3	-1	330.11	12.01	81.6	0	93.61	14	1	-1	0	0
1	1	14	10	4	0	0	0	120.7	88.01	3	-1	90.01	11.35	88.01	0	99.36	14	1	-1	0	0
1	1	14	11	3	0	0	0	191.13	75.25	1	-1	250.18	11.93	75.25	0	87.18	14	1	-1	0	0
1	1	14	12	3	0	0	0	134.5	65.23	2	-1	30	0	75.25	0	88.19	14	0	-1	0	0
1	1	14	13	4	0	0	0	103.77	31.22	1	-1	53.66	0	88.01	0	31.22	14	0	-1	0	0
1	1	14	14	1	0	0	0	162.27	5	2	-1	75.5	0	70	0	8.16	14	0	-1	0	0
1	1	14	15	3	0	0	0	111.55	27.02	3	-1	0	0	75.25	0	29.17	14	0	-1	0	0
1	1	14	16	1	0	0	0	118.08	70	3	-1	70	9.04	70	0	79.04	14	1	-1	0	0
1	1	14	17	5	0	0	0	120	5.28	2	-1	0	0	81.6	0	5.28	14	0	-1	0	0
1	1	14	18	2	0	0	0	210.12	62.01	3	-1	112	34.27	62.01	0	96.28	14	1	-1	0	0
1	1	14	19	2	0	0	0	160.69	30	3	-1	0	0	62.01	0	33.83	14	0	-1	0	0
1	1	14	20	4	0	0	0	117.4	87.91	1	-1	165.88	0	88.01	0	92.25	14	0	-1	0	0
1	1	15	1	2	0	0	0	137.77	42	2	-1	60	0	52.01	0	47.03	15	0	-1	0	0
1	1	15	2	5	0	0	0	129.5	64.96	3	-1	0	0	75.99	0	71.06	15	0	-1	0	0
1	1	15	3	4	0	0	0	107.12	75.3	2	-1	88.6	0	91.74	0	78.28	15	0	-1	0	0
1	1	15	4	5	0	0	0	125.4	55	3	-1	0	0	75.99	0	60.35	15	0	-1	0	0
1	1	15	5	2	0	0	0	208.22	50	2	-1	102	0	52.01	0	61.57	15	0	-1	0	0
1	1	15	6	3	0	0	0	100	2.36	1	-1	62.06	0	70.25	0	2.36	15	0	-1	0	0
1	1	15	7	1	0	0	0	137.23	35	2	-1	44	0	60.32	0	60.5	15	0	-1	0	0
1	1	15	8	1	0	0	0	166.3	60.32	4	-1	0	10	60.32	0	70.32	15	1	-1	0	0
1	1	15	9	5	0	0	0	176	75.99	3	-1	330.11	5	75.99	0	80.99	15	1	-1	0	0
1	1	15	10	4	0	0	0	120.7	27.3	3	-1	90.01	0	91.74	0	28.57	15	0	-1	0	0
1	1	15	11	3	0	0	0	211.46	70.25	1	-1	250.18	20.33	70.25	0	90.58	15	1	-1	0	0
1	1	15	12	3	0	0	0	134.5	50	2	-1	30	0	70.25	0	83.77	15	0	-1	0	0
1	1	15	13	4	0	0	0	103.77	91.74	1	-1	53.66	0	91.74	0	91.74	15	1	-1	0	0
1	1	15	14	1	0	0	0	162.27	1	2	-1	75.5	0	60.32	0	1.98	15	0	-1	0	0
1	1	15	15	3	0	0	0	111.55	20.02	3	-1	0	0	70.25	0	22.52	15	0	-1	0	0
1	1	15	16	1	0	0	0	118.08	38.7	3	-1	70	0	60.32	0	43.61	15	0	-1	0	0
1	1	15	17	5	0	0	0	120	30.41	2	-1	0	0	75.99	0	34.41	15	0	-1	0	0
1	1	15	18	2	0	0	0	222.13	52.01	3	-1	112	12.01	52.01	0	64.02	15	1	-1	0	0
1	1	15	19	2	0	0	0	160.69	45	3	-1	0	0	52.01	0	51.33	15	0	-1	0	0
1	1	15	20	4	0	0	0	117.4	76.01	1	-1	165.88	0	91.74	0	78	15	0	-1	0	0
1	1	16	1	2	0	0	0	137.77	20	2	-1	60	0	70	0	22.78	16	0	-1	0	0
1	1	16	2	5	0	0	0	129.5	25.38	3	-1	0	0	51.25	0	25.38	16	0	-1	0	0
1	1	16	3	4	0	0	0	107.12	37	2	-1	88.6	0	94.21	0	44.99	16	0	-1	0	0
1	1	16	4	5	0	0	0	125.4	10	3	-1	0	0	51.25	0	17.35	16	0	-1	0	0
1	1	16	5	2	0	0	0	233.98	70	2	-1	102	25.76	70	0	95.76	16	1	-1	0	0
1	1	16	6	3	0	0	0	112	50.06	1	-1	62.06	12	50.06	0	62.06	16	1	-1	0	0
1	1	16	7	1	0	0	0	173.46	45	2	-1	44	36.23	45	0	81.23	16	1	-1	0	0
1	1	16	8	1	0	0	0	166.3	38.25	4	-1	0	0	45	0	43.25	16	0	-1	0	0
1	1	16	9	5	0	0	0	179	51.25	3	-1	330.11	3	51.25	0	54.25	16	1	-1	0	0
1	1	16	10	4	0	0	0	120.7	38	3	-1	90.01	0	94.21	0	40.92	16	0	-1	0	0
1	1	16	11	3	0	0	0	211.46	15	1	-1	250.18	0	50.06	0	25.47	16	0	-1	0	0
1	1	16	12	3	0	0	0	134.5	30	2	-1	30	0	50.06	0	35.24	16	0	-1	0	0
1	1	16	13	4	0	0	0	103.77	67	1	-1	53.66	0	94.21	0	69.95	16	0	-1	0	0
1	1	16	14	1	0	0	0	162.27	18.85	2	-1	75.5	0	45	0	23.85	16	0	-1	0	0
1	1	16	15	3	0	0	0	111.55	46.02	3	-1	0	0	50.06	0	49.15	16	0	-1	0	0
1	1	16	16	1	0	0	0	118.08	30.8	3	-1	70	0	45	0	38.08	16	0	-1	0	0
1	1	16	17	5	0	0	0	120	41.36	2	-1	0	0	51.25	0	46.36	16	0	-1	0	0
1	1	16	18	2	0	0	0	222.13	32.01	3	-1	112	0	70	0	41.44	16	0	-1	0	0
1	1	16	19	2	0	0	0	160.69	50	3	-1	0	0	70	0	53.37	16	0	-1	0	0
1	1	16	20	4	0	0	0	120.75	94.21	1	-1	165.88	3.35	94.21	0	97.56	16	1	-1	0	0
1	1	17	1	2	0	0	0	137.77	62.01	2	-1	60	0	67	0	70.54	17	0	-1	0	0
1	1	17	2	5	0	0	0	137.7	64.89	3	-1	0	8.2	64.89	0	73.09	17	1	-1	0	0
1	1	17	3	4	0	0	0	107.12	6.3	2	-1	88.6	0	51.01	0	13.74	17	0	-1	0	0
1	1	17	4	5	0	0	0	125.4	28	3	-1	0	0	64.89	0	31.1	17	0	-1	0	0
1	1	17	5	2	0	0	0	233.98	34	2	-1	102	0	67	0	39.03	17	0	-1	0	0
1	1	17	6	3	0	0	0	112	30.04	1	-1	62.06	0	40.07	0	36.04	17	0	-1	0	0
1	1	17	7	1	0	0	0	173.46	17	2	-1	44	0	50.88	0	42.98	17	0	-1	0	0
1	1	17	8	1	0	0	0	166.3	45.53	4	-1	0	0	50.88	0	55.53	17	0	-1	0	0
1	1	17	9	5	0	0	0	179	40.52	3	-1	330.11	0	64.89	0	42.52	17	0	-1	0	0
1	1	17	10	4	0	0	0	125.31	51.01	3	-1	90.01	4.61	51.01	0	55.62	17	1	-1	0	0
1	1	17	11	3	0	0	0	211.46	25.61	1	-1	250.18	0	40.07	0	38.61	17	0	-1	0	0
1	1	17	12	3	0	0	0	134.5	25	2	-1	30	0	40.07	0	26.95	17	0	-1	0	0
1	1	17	13	4	0	0	0	103.77	17.69	1	-1	53.66	0	51.01	0	17.69	17	0	-1	0	0
1	1	17	14	1	0	0	0	174.27	50.88	2	-1	75.5	12	50.88	0	62.88	17	1	-1	0	0
1	1	17	15	3	0	0	0	115.67	40.07	3	-1	0	4.12	40.07	0	44.19	17	1	-1	0	0
1	1	17	16	1	0	0	0	118.08	22	3	-1	70	0	50.88	0	27.12	17	0	-1	0	0
1	1	17	17	5	0	0	0	120	50.06	2	-1	0	0	64.89	0	55.06	17	0	-1	0	0
1	1	17	18	2	0	0	0	222.13	62.05	3	-1	112	0	67	0	95.89	17	0	-1	0	0
1	1	17	19	2	0	0	0	184.62	67	3	-1	0	23.93	67	0	90.93	17	1	-1	0	0
1	1	17	20	4	0	0	0	120.75	6.75	1	-1	165.88	0	51.01	0	8.18	17	0	-1	0	0
1	1	18	1	2	0	0	0	155.58	60.01	2	-1	60	17.81	60.01	0	77.82	18	1	-1	0	0
1	1	18	2	5	0	0	0	137.7	59.96	3	-1	0	0	62.01	0	68.34	18	0	-1	0	0
1	1	18	3	4	0	0	0	107.12	74.7	2	-1	88.6	0	84.52	0	77.32	18	0	-1	0	0
1	1	18	4	5	0	0	0	125.4	30	3	-1	0	0	62.01	0	32.11	18	0	-1	0	0
1	1	18	5	2	0	0	0	233.98	34	2	-1	102	0	60.01	0	34.08	18	0	-1	0	0
1	1	18	6	3	0	0	0	112	60.97	1	-1	62.06	0	80.07	0	74.97	18	0	-1	0	0
1	1	18	7	1	0	0	0	173.46	26	2	-1	44	0	70.09	0	56.08	18	0	-1	0	0
1	1	18	8	1	0	0	0	166.3	5.75	4	-1	0	0	70.09	0	7.75	18	0	-1	0	0
1	1	18	9	5	0	0	0	182.25	62.01	3	-1	330.11	3.25	62.01	0	65.26	18	1	-1	0	0
1	1	18	10	4	0	0	0	125.31	72.02	3	-1	90.01	0	84.52	0	76.08	18	0	-1	0	0
1	1	18	11	3	0	0	0	211.46	0.75	1	-1	250.18	0	80.07	0	0.98	18	0	-1	0	0
1	1	18	12	3	0	0	0	134.5	35.24	2	-1	30	0	80.07	0	38.24	18	0	-1	0	0
1	1	18	13	4	0	0	0	103.77	56	1	-1	53.66	0	84.52	0	58.37	18	0	-1	0	0
1	1	18	14	1	0	0	0	187.27	70.09	2	-1	75.5	13	70.09	0	83.09	18	1	-1	0	0
1	1	18	15	3	0	0	0	132.14	80.07	3	-1	0	16.47	80.07	0	96.54	18	1	-1	0	0
1	1	18	16	1	0	0	0	118.08	8	3	-1	70	0	70.09	0	10.85	18	0	-1	0	0
1	1	18	17	5	0	0	0	120	11	2	-1	0	0	62.01	0	11.81	18	0	-1	0	0
1	1	18	18	2	0	0	0	222.13	53	3	-1	112	0	60.01	0	63.07	18	0	-1	0	0
1	1	18	19	2	0	0	0	184.62	25	3	-1	0	0	60.01	0	27.89	18	0	-1	0	0
1	1	18	20	4	0	0	0	124.02	84.52	1	-1	165.88	3.27	84.52	0	87.79	18	1	-1	0	0
1	1	19	1	2	0	0	0	155.58	5	2	-1	60	0	65	0	8.49	19	0	-1	0	0
1	1	19	2	5	0	0	0	151.15	67.78	3	-1	0	13.45	67.78	0	81.23	19	1	-1	0	0
1	1	19	3	4	0	0	0	107.12	9	2	-1	88.6	0	40	0	18.6	19	0	-1	0	0
1	1	19	4	5	0	0	0	125.4	15	3	-1	0	0	67.78	0	19.27	19	0	-1	0	0
1	1	19	5	2	0	0	0	233.98	3	2	-1	102	0	65	0	3.35	19	0	-1	0	0
1	1	19	6	3	0	0	0	112	10.04	1	-1	62.06	0	41	0	21.04	19	0	-1	0	0
1	1	19	7	1	0	0	0	173.46	49	2	-1	44	0	80	0	95.18	19	0	-1	0	0
1	1	19	8	1	0	0	0	166.3	55.76	4	-1	0	0	80	0	61.76	19	0	-1	0	0
1	1	19	9	5	0	0	0	182.25	54.36	3	-1	330.11	0	67.78	0	56.86	19	0	-1	0	0
1	1	19	10	4	0	0	0	125.31	37	3	-1	90.01	0	40	0	37.42	19	0	-1	0	0
1	1	19	11	3	0	0	0	211.46	5.25	1	-1	250.18	0	41	0	7.78	19	0	-1	0	0
1	1	19	12	3	0	0	0	136.36	41	2	-1	30	1.86	41	0	42.86	19	1	-1	0	0
1	1	19	13	4	0	0	0	106.27	40	1	-1	53.66	2.5	40	0	42.5	19	1	-1	0	0
1	1	19	14	1	0	0	0	187.27	40.4	2	-1	75.5	0	80	0	48.4	19	0	-1	0	0
1	1	19	15	3	0	0	0	132.14	35.02	3	-1	0	0	41	0	38.72	19	0	-1	0	0
1	1	19	16	1	0	0	0	125.04	80	3	-1	70	6.96	80	0	86.96	19	1	-1	0	0
1	1	19	17	5	0	0	0	120	20.66	2	-1	0	0	67.78	0	28.66	19	0	-1	0	0
1	1	19	18	2	0	0	0	245.89	65	3	-1	112	23.76	65	0	88.76	19	1	-1	0	0
1	1	19	19	2	0	0	0	184.62	50	3	-1	0	0	65	0	57.9	19	0	-1	0	0
1	1	19	20	4	0	0	0	124.02	8.02	1	-1	165.88	0	40	0	10.63	19	0	-1	0	0
1	1	20	1	2	0	0	0	155.58	10	2	-1	60	0	30	0	11.5	20	0	-1	0	0
1	1	20	2	5	0	0	0	151.15	2.96	3	-1	0	0	89.04	0	2.96	20	0	-1	0	0
1	1	20	3	4	0	0	0	109.43	91.8	2	-1	88.6	2.31	91.8	0	94.11	20	1	-1	0	0
1	1	20	4	5	0	0	0	125.4	71.42	3	-1	0	0	89.04	0	81.52	20	0	-1	0	0
1	1	20	5	2	0	0	0	237.89	30	2	-1	102	3.91	30	0	33.91	20	1	-1	0	0
1	1	20	6	3	0	0	0	112	0.63	1	-1	62.06	0	77.07	0	1.63	20	0	-1	0	0
1	1	20	7	1	0	0	0	173.46	35	2	-1	44	0	80.17	0	54.38	20	0	-1	0	0
1	1	20	8	1	0	0	0	181.3	80.17	4	-1	0	15	80.17	0	95.17	20	1	-1	0	0
1	1	20	9	5	0	0	0	187.75	89.04	3	-1	330.11	5.5	89.04	0	94.54	20	1	-1	0	0
1	1	20	10	4	0	0	0	125.31	35	3	-1	90.01	0	91.8	0	35.98	20	0	-1	0	0
1	1	20	11	3	0	0	0	211.46	7.15	1	-1	250.18	0	77.07	0	14.3	20	0	-1	0	0
1	1	20	12	3	0	0	0	136.36	65.2	2	-1	30	0	77.07	0	76.85	20	0	-1	0	0
1	1	20	13	4	0	0	0	106.27	79.99	1	-1	53.66	0	91.8	0	91.84	20	0	-1	0	0
1	1	20	14	1	0	0	0	187.27	20.28	2	-1	75.5	0	80.17	0	24.28	20	0	-1	0	0
1	1	20	15	3	0	0	0	146.67	77.07	3	-1	0	14.53	77.07	0	91.6	20	1	-1	0	0
1	1	20	16	1	0	0	0	125.04	28	3	-1	70	0	80.17	0	32.92	20	0	-1	0	0
1	1	20	17	5	0	0	0	120	20.36	2	-1	0	0	89.04	0	28.36	20	0	-1	0	0
1	1	20	18	2	0	0	0	245.89	0	3	-1	112	0	30	0	2.26	20	0	-1	0	0
1	1	20	19	2	0	0	0	184.62	20	3	-1	0	0	30	0	24.39	20	0	-1	0	0
1	1	20	20	4	0	0	0	124.02	14.76	1	-1	165.88	0	91.8	0	17.29	20	0	-1	0	0
1	1	21	1	2	0	0	0	178.4	55	2	-1	115	22.82	55	0	77.82	18	1	2	1	1
1	1	21	2	5	0	0	0	158.5	60.99	3	-1	60.99	7.35	60.99	0	68.34	18	1	3	1	1
1	1	21	3	4	0	0	0	109.43	75.3	2	-1	88.6	0	83.46	0	77.32	18	0	1	1	1
1	1	21	4	5	0	0	0	125.4	25	3	-1	0	0	60.99	0	32.11	18	0	3	1	1
1	1	21	5	2	0	0	0	237.89	30	2	-1	102	0	55	0	34.08	18	0	2	1	1
1	1	21	6	3	0	0	0	112	74.97	1	-1	62.06	0	80.07	0	74.97	18	0	3	1	1
1	1	21	7	1	0	0	0	173.46	16	2	-1	44	0	73.09	0	56.08	18	0	2	1	1
1	1	21	8	1	0	0	0	181.3	7.5	4	-1	0	0	73.09	0	7.75	18	0	2	1	0
1	1	21	9	5	0	0	0	187.75	60.01	3	-1	330.11	0	60.99	0	65.26	18	0	3	1	1
1	1	21	10	4	0	0	0	125.31	72.02	3	-1	90.01	0	83.46	0	76.08	18	0	1	1	1
1	1	21	11	3	0	0	0	211.46	0.98	1	-1	250.18	0	80.07	0	0.98	18	0	3	1	1
1	1	21	12	3	0	0	0	136.36	30.22	2	-1	30	0	80.07	0	38.24	18	0	3	1	1
1	1	21	13	4	0	0	0	106.27	58.37	1	-1	53.66	0	83.46	0	58.37	18	0	1	1	1
1	1	21	14	1	0	0	0	197.27	73.09	2	-1	148.59	10	73.09	0	83.09	18	1	2	1	1
1	1	21	15	3	0	0	0	163.14	80.07	3	-1	80.07	16.47	80.07	0	96.54	18	1	3	1	1
1	1	21	16	1	0	0	0	125.04	8	3	-1	70	0	73.09	0	10.85	18	0	2	1	1
1	1	21	17	5	0	0	0	120	11.81	2	-1	0	0	60.99	0	11.81	18	0	3	1	1
1	1	21	18	2	0	0	0	245.89	52	3	-1	112	0	55	0	63.07	18	0	2	1	1
1	1	21	19	2	0	0	0	184.62	25	3	-1	0	0	55	0	27.89	18	0	2	1	1
1	1	21	20	4	0	0	0	128.35	83.46	1	-1	249.34	4.33	83.46	0	87.79	18	1	1	1	1
1	1	22	1	2	0	0	0	178.4	30.01	2	-1	115	0	55	0	39.13	11	0	3	1	1
1	1	22	2	5	0	0	0	158.5	21.99	3	-1	60.99	0	75.31	0	25.84	11	0	3	1	1
1	1	22	3	4	0	0	0	111.47	78.5	2	-1	167.1	2.04	78.5	0	80.54	11	1	2	1	1
1	1	22	4	5	0	0	0	135.5	75.31	3	-1	75.31	10.1	75.31	0	85.41	11	1	3	1	1
1	1	22	5	2	0	0	0	237.89	2	2	-1	102	0	55	0	4.07	11	0	3	1	1
1	1	22	6	3	0	0	0	112	24.39	1	-1	62.06	0	72.07	0	24.39	11	0	3	1	1
1	1	22	7	1	0	0	0	173.46	16	2	-1	44	0	50	0	45.29	11	0	2	1	1
1	1	22	8	1	0	0	0	181.3	15.41	4	-1	0	0	50	0	20.41	11	0	2	1	0
1	1	22	9	5	0	0	0	187.75	9	3	-1	330.11	0	75.31	0	9.21	11	0	3	1	1
1	1	22	10	4	0	0	0	125.31	8.2	3	-1	90.01	0	78.5	0	8.21	11	0	2	1	1
1	1	22	11	3	0	0	0	211.46	36.21	1	-1	250.18	0	72.07	0	36.21	11	0	3	1	1
1	1	22	12	3	0	0	0	136.36	53.03	2	-1	30	0	72.07	0	66.73	11	0	3	1	1
1	1	22	13	4	0	0	0	106.27	13.51	1	-1	53.66	0	78.5	0	13.51	11	0	2	1	1
1	1	22	14	1	0	0	0	205.31	50	2	-1	198.59	8.04	50	0	58.04	11	1	2	1	1
1	1	22	15	3	0	0	0	170.64	72.07	3	-1	152.14	7.5	72.07	0	79.57	11	1	3	1	1
1	1	22	16	1	0	0	0	125.04	15	3	-1	70	0	50	0	21.85	11	0	2	1	1
1	1	22	17	5	0	0	0	120	2.34	2	-1	0	0	75.31	0	2.34	11	0	3	1	1
1	1	22	18	2	0	0	0	245.89	10	3	-1	112	0	55	0	15.93	11	0	3	1	1
1	1	22	19	2	0	0	0	186.25	55	3	-1	55	1.63	55	0	56.63	11	1	3	1	1
1	1	22	20	4	0	0	0	128.35	12.85	1	-1	249.34	0	78.5	0	15.07	11	0	2	1	1
1	1	23	1	2	0	0	0	178.4	55.01	2	-1	115	0	75	0	70.54	17	0	3	1	1
1	1	23	2	5	0	0	0	168.86	62.73	3	-1	123.72	10.36	62.73	0	73.09	17	1	3	1	1
1	1	23	3	4	0	0	0	111.47	10	2	-1	167.1	0	52.03	0	13.74	17	0	3	1	1
1	1	23	4	5	0	0	0	135.5	29	3	-1	75.31	0	62.73	0	31.1	17	0	3	1	1
1	1	23	5	2	0	0	0	237.89	37	2	-1	102	0	75	0	39.03	17	0	3	1	1
1	1	23	6	3	0	0	0	112	36.04	1	-1	62.06	0	44.19	0	36.04	17	0	3	1	1
1	1	23	7	1	0	0	0	173.46	16	2	-1	44	0	50.88	0	42.98	17	0	2	1	1
1	1	23	8	1	0	0	0	181.3	50.53	4	-1	0	0	50.88	0	55.53	17	0	2	1	0
1	1	23	9	5	0	0	0	187.75	40.52	3	-1	330.11	0	62.73	0	42.52	17	0	3	1	1
1	1	23	10	4	0	0	0	128.9	52.03	3	-1	142.04	3.59	52.03	0	55.62	17	1	3	1	1
1	1	23	11	3	0	0	0	211.46	38.61	1	-1	250.18	0	44.19	0	38.61	17	0	3	1	1
1	1	23	12	3	0	0	0	136.36	21	2	-1	30	0	44.19	0	26.95	17	0	3	1	1
1	1	23	13	4	0	0	0	106.27	17.69	1	-1	53.66	0	52.03	0	17.69	17	0	3	1	1
1	1	23	14	1	0	0	0	217.31	50.88	2	-1	249.47	12	50.88	0	62.88	17	1	2	1	1
1	1	23	15	3	0	0	0	170.64	44.19	3	-1	196.33	0	44.19	0	44.19	17	1	3	1	1
1	1	23	16	1	0	0	0	125.04	20	3	-1	70	0	50.88	0	27.12	17	0	2	1	1
1	1	23	17	5	0	0	0	120	50.06	2	-1	0	0	62.73	0	55.06	17	0	3	1	1
1	1	23	18	2	0	0	0	245.89	67.8	3	-1	112	0	75	0	95.89	17	0	3	1	1
1	1	23	19	2	0	0	0	202.18	75	3	-1	130	15.93	75	0	90.93	17	1	3	1	1
1	1	23	20	4	0	0	0	128.35	5.99	1	-1	249.34	0	52.03	0	8.18	17	0	3	1	1
1	1	24	1	2	0	0	0	178.4	60.01	2	-1	115	0	65	0	88.76	4	0	3	1	1
1	1	24	2	5	0	0	0	168.86	63.94	3	-1	123.72	0	75.9	0	74.77	4	0	3	1	1
1	1	24	3	4	0	0	0	111.47	36	2	-1	167.1	0	88.54	0	38.85	4	0	1	1	1
1	1	24	4	5	0	0	0	146.5	75.9	3	-1	151.21	11	75.9	0	86.9	4	1	3	1	1
1	1	24	5	2	0	0	0	237.89	57	2	-1	102	0	65	0	73.62	4	0	3	1	1
1	1	24	6	3	0	0	0	112	45.01	1	-1	62.06	0	55.2	0	45.01	4	0	1	1	1
1	1	24	7	1	0	0	0	173.46	5	2	-1	44	0	51	0	8.08	4	0	4	1	1
1	1	24	8	1	0	0	0	183.6	51	4	-1	0	2.3	51	0	53.3	4	1	4	1	0
1	1	24	9	5	0	0	0	187.75	5.67	3	-1	330.11	0	75.9	0	5.67	4	0	3	1	1
1	1	24	10	4	0	0	0	128.9	81.04	3	-1	142.04	0	88.54	0	84.29	4	0	1	1	1
1	1	24	11	3	0	0	0	211.46	55.2	1	-1	305.38	0	55.2	0	55.2	4	1	1	1	1
1	1	24	12	3	0	0	0	136.36	0.11	2	-1	30	0	55.2	0	0.15	4	0	1	1	1
1	1	24	13	4	0	0	0	106.27	88.54	1	-1	142.2	0	88.54	0	88.54	4	1	1	1	1
1	1	24	14	1	0	0	0	217.31	30.69	2	-1	249.47	0	51	0	40.69	4	0	4	1	1
1	1	24	15	3	0	0	0	170.64	47.07	3	-1	196.33	0	55.2	0	49.67	4	0	1	1	1
1	1	24	16	1	0	0	0	125.04	40	3	-1	70	0	51	0	49.36	4	0	4	1	1
1	1	24	17	5	0	0	0	120	30	2	-1	0	0	75.9	0	36	4	0	3	1	1
1	1	24	18	2	0	0	0	273.44	65	3	-1	177	27.55	65	0	92.55	4	1	3	1	1
1	1	24	19	2	0	0	0	202.18	25	3	-1	130	0	65	0	27.67	4	0	3	1	1
1	1	24	20	4	0	0	0	128.35	43.55	1	-1	249.34	0	88.54	0	46.7	4	0	1	1	1
1	1	25	1	2	0	0	0	178.4	5	2	-1	115	0	72	0	8.49	19	0	3	1	1
1	1	25	2	5	0	0	0	179.14	70.95	3	-1	194.67	10.28	70.95	0	81.23	19	1	3	1	1
1	1	25	3	4	0	0	0	111.47	12	2	-1	167.1	0	42.5	0	18.6	19	0	1	1	1
1	1	25	4	5	0	0	0	146.5	19	3	-1	151.21	0	70.95	0	19.27	19	0	3	1	1
1	1	25	5	2	0	0	0	237.89	2	2	-1	102	0	72	0	3.35	19	0	3	1	1
1	1	25	6	3	0	0	0	112	21.04	1	-1	62.06	0	38.72	0	21.04	19	0	3	1	1
1	1	25	7	1	0	0	0	173.46	39	2	-1	44	0	80	0	95.18	19	0	3	1	1
1	1	25	8	1	0	0	0	183.6	51.76	4	-1	0	0	80	0	61.76	19	0	3	1	0
1	1	25	9	5	0	0	0	187.75	54.86	3	-1	330.11	0	70.95	0	56.86	19	0	3	1	1
1	1	25	10	4	0	0	0	128.9	36.05	3	-1	142.04	0	42.5	0	37.42	19	0	1	1	1
1	1	25	11	3	0	0	0	211.46	7.78	1	-1	305.38	0	38.72	0	7.78	19	0	3	1	1
1	1	25	12	3	0	0	0	136.36	35.33	2	-1	30	0	38.72	0	42.86	19	0	3	1	1
1	1	25	13	4	0	0	0	106.27	42.5	1	-1	184.7	0	42.5	0	42.5	19	1	1	1	1
1	1	25	14	1	0	0	0	217.31	40.4	2	-1	249.47	0	80	0	48.4	19	0	3	1	1
1	1	25	15	3	0	0	0	170.64	38.72	3	-1	235.05	0	38.72	0	38.72	19	1	3	1	1
1	1	25	16	1	0	0	0	132	80	3	-1	150	6.96	80	0	86.96	19	1	3	1	1
1	1	25	17	5	0	0	0	120	20.66	2	-1	0	0	70.95	0	28.66	19	0	3	1	1
1	1	25	18	2	0	0	0	290.2	72	3	-1	249	16.76	72	0	88.76	19	1	3	1	1
1	1	25	19	2	0	0	0	202.18	55	3	-1	130	0	72	0	57.9	19	0	3	1	1
1	1	25	20	4	0	0	0	128.35	8.5	1	-1	249.34	0	42.5	0	10.63	19	0	1	1	1
1	1	26	1	2	0	0	0	202.47	65.01	2	-1	180.01	24.07	65.01	0	89.08	13	1	2	1	1
1	1	26	2	5	0	0	0	179.14	44.83	3	-1	194.67	0	54.71	0	55.69	13	0	3	1	1
1	1	26	3	4	0	0	0	111.47	1.5	2	-1	167.1	0	76.77	0	3.27	13	0	1	1	1
1	1	26	4	5	0	0	0	146.5	30	3	-1	151.21	0	54.71	0	33.15	13	0	3	1	1
1	1	26	5	2	0	0	0	237.89	52	2	-1	102	0	65.01	0	57.08	13	0	2	1	1
1	1	26	6	3	0	0	0	112	61.04	1	-1	62.06	0	82.81	0	61.04	13	0	1	1	1
1	1	26	7	1	0	0	0	173.46	16	2	-1	44	0	66.84	0	51.09	13	0	2	1	1
1	1	26	8	1	0	0	0	183.6	27.19	4	-1	0	0	66.84	0	32.19	13	0	2	1	0
1	1	26	9	5	0	0	0	190.75	54.71	3	-1	384.82	3	54.71	0	57.71	13	1	3	1	1
1	1	26	10	4	0	0	0	128.9	15.42	3	-1	142.04	0	76.77	0	15.48	13	0	1	1	1
1	1	26	11	3	0	0	0	221.46	82.81	1	-1	388.19	10	82.81	0	92.81	13	1	1	1	1
1	1	26	12	3	0	0	0	136.36	20	2	-1	30	0	82.81	0	20.4	13	0	1	1	1
1	1	26	13	4	0	0	0	106.27	76.77	1	-1	261.47	0	76.77	0	76.77	13	1	1	1	1
1	1	26	14	1	0	0	0	227.31	66.84	2	-1	316.31	10	66.84	0	76.84	13	1	2	1	1
1	1	26	15	3	0	0	0	170.64	11.26	3	-1	235.05	0	82.81	0	11.26	13	0	1	1	1
1	1	26	16	1	0	0	0	132	50	3	-1	150	0	66.84	0	55.43	13	0	2	1	1
1	1	26	17	5	0	0	0	120	30.8	2	-1	0	0	54.71	0	38.8	13	0	3	1	1
1	1	26	18	2	0	0	0	290.2	62.5	3	-1	249	0	65.01	0	77.59	13	0	2	1	1
1	1	26	19	2	0	0	0	202.18	10	3	-1	130	0	65.01	0	11.83	13	0	2	1	1
1	1	26	20	4	0	0	0	128.35	1.58	1	-1	249.34	0	76.77	0	2.09	13	0	1	1	1
1	1	27	1	2	0	0	0	202.47	45.02	2	-1	180.01	0	70	0	50.15	12	0	3	1	1
1	1	27	2	5	0	0	0	192.39	76.93	3	-1	271.6	13.25	76.93	0	90.18	12	1	3	1	1
1	1	27	3	4	0	0	0	111.47	1	2	-1	167.1	0	83.95	0	1.76	12	0	1	1	1
1	1	27	4	5	0	0	0	146.5	52.35	3	-1	151.21	0	76.93	0	57.36	12	0	3	1	1
1	1	27	5	2	0	0	0	237.89	34	2	-1	102	0	70	0	34.8	12	0	3	1	1
1	1	27	6	3	0	0	0	112	33.83	1	-1	62.06	0	60.22	0	33.83	12	0	2	1	1
1	1	27	7	1	0	0	0	173.46	1	2	-1	44	0	80.5	0	9.63	12	0	2	1	1
1	1	27	8	1	0	0	0	183.6	58.24	4	-1	0	0	80.5	0	66.24	12	0	2	1	0
1	1	27	9	5	0	0	0	190.75	34.63	3	-1	384.82	0	76.93	0	36.63	12	0	3	1	1
1	1	27	10	4	0	0	0	128.9	25.03	3	-1	142.04	0	83.95	0	26.28	12	0	1	1	1
1	1	27	11	3	0	0	0	221.46	40.74	1	-1	388.19	0	60.22	0	40.74	12	0	2	1	1
1	1	27	12	3	0	0	0	148.37	60.22	2	-1	90.22	12.01	60.22	0	72.23	12	1	2	1	1
1	1	27	13	4	0	0	0	106.27	69.39	1	-1	261.47	0	83.95	0	69.39	12	0	1	1	1
1	1	27	14	1	0	0	0	243.91	80.5	2	-1	396.81	16.6	80.5	0	97.1	12	1	2	1	1
1	1	27	15	3	0	0	0	170.64	32.6	3	-1	235.05	0	60.22	0	32.6	12	0	2	1	1
1	1	27	16	1	0	0	0	132	50	3	-1	150	0	80.5	0	58.95	12	0	2	1	1
1	1	27	17	5	0	0	0	120	67.51	2	-1	0	0	76.93	0	77.51	12	0	3	1	1
1	1	27	18	2	0	0	0	290.2	10	3	-1	249	0	70	0	17.34	12	0	3	1	1
1	1	27	19	2	0	0	0	221.63	70	3	-1	200	19.45	70	0	89.45	12	1	3	1	1
1	1	27	20	4	0	0	0	132.67	83.95	1	-1	333.29	4.32	83.95	0	88.27	12	1	1	1	1
1	1	28	1	2	0	0	0	202.47	20.02	2	-1	180.01	0	65	0	26.26	5	0	3	1	1
1	1	28	2	5	0	0	0	192.39	39.69	3	-1	271.6	0	74.48	0	45.59	5	0	2	1	1
1	1	28	3	4	0	0	0	111.47	42.3	2	-1	167.1	0	90.15	0	45.4	5	0	3	1	1
1	1	28	4	5	0	0	0	146.5	25	3	-1	151.21	0	74.48	0	28.59	5	0	2	1	1
1	1	28	5	2	0	0	0	237.89	0.11	2	-1	102	0	65	0	0.58	5	0	3	1	1
1	1	28	6	3	0	0	0	112	42.88	1	-1	62.06	0	75.05	0	42.88	5	0	2	1	1
1	1	28	7	1	0	0	0	173.46	7	2	-1	44	0	56.51	0	14.91	5	0	2	1	1
1	1	28	8	1	0	0	0	183.6	54.85	4	-1	0	0	56.51	0	64.85	5	0	2	1	0
1	1	28	9	5	0	0	0	190.75	20.36	3	-1	384.82	0	74.48	0	21.36	5	0	2	1	1
1	1	28	10	4	0	0	0	136.21	90.15	3	-1	232.19	7.31	90.15	0	97.46	5	1	3	1	1
1	1	28	11	3	0	0	0	221.46	69.95	1	-1	388.19	0	75.05	0	69.95	5	0	2	1	1
1	1	28	12	3	0	0	0	165.04	75.05	2	-1	165.27	16.67	75.05	0	91.72	5	1	2	1	1
1	1	28	13	4	0	0	0	106.27	8.95	1	-1	261.47	0	90.15	0	8.95	5	0	3	1	1
1	1	28	14	1	0	0	0	253.91	56.51	2	-1	453.32	10	56.51	0	66.51	5	1	2	1	1
1	1	28	15	3	0	0	0	170.64	68.07	3	-1	235.05	0	75.05	0	71.41	5	0	2	1	1
1	1	28	16	1	0	0	0	132	20	3	-1	150	0	56.51	0	23.88	5	0	2	1	1
1	1	28	17	5	0	0	0	140	74.48	2	-1	74.48	20	74.48	0	94.48	5	1	2	1	1
1	1	28	18	2	0	0	0	290.2	15	3	-1	249	0	65	0	20.25	5	0	3	1	1
1	1	28	19	2	0	0	0	236.3	65	3	-1	265	14.67	65	0	79.67	5	1	3	1	1
1	1	28	20	4	0	0	0	132.67	84.01	1	-1	333.29	0	90.15	0	87.12	5	0	3	1	1
1	1	29	1	2	0	0	0	202.47	10.02	2	-1	180.01	0	32	0	11.5	20	0	2	1	1
1	1	29	2	5	0	0	0	192.39	2.96	3	-1	271.6	0	87.04	0	2.96	20	0	3	1	1
1	1	29	3	4	0	0	0	111.47	91.2	2	-1	167.1	0	91.84	0	94.11	20	0	1	1	1
1	1	29	4	5	0	0	0	146.5	71.5	3	-1	151.21	0	87.04	0	81.52	20	0	3	1	1
1	1	29	5	2	0	0	0	239.8	32	2	-1	134	1.91	32	0	33.91	20	1	2	1	1
1	1	29	6	3	0	0	0	112	1.63	1	-1	62.06	0	121.46	0	1.63	20	0	1	1	1
1	1	29	7	1	0	0	0	173.46	17	2	-1	44	0	82.17	0	54.38	20	0	4	1	1
1	1	29	8	1	0	0	0	196.6	82.17	4	-1	0	13	82.17	0	95.17	20	1	4	1	0
1	1	29	9	5	0	0	0	198.25	87.04	3	-1	471.86	7.5	87.04	0	94.54	20	1	3	1	1
1	1	29	10	4	0	0	0	136.21	34	3	-1	232.19	0	91.84	0	35.98	20	0	1	1	1
1	1	29	11	3	0	0	0	114.3	121.46	1	-1	509.65	-107.16	121.46	0	14.3	20	1	1	1	1
1	1	29	12	3	0	0	0	165.04	61.2	2	-1	165.27	0	121.46	0	76.85	20	0	1	1	1
1	1	29	13	4	0	0	0	106.27	91.84	1	-1	353.31	0	91.84	0	91.84	20	1	1	1	1
1	1	29	14	1	0	0	0	253.91	20.28	2	-1	453.32	0	82.17	0	24.28	20	0	4	1	1
1	1	29	15	3	0	0	0	170.64	85.08	3	-1	235.05	0	121.46	0	91.6	20	0	1	1	1
1	1	29	16	1	0	0	0	132	29	3	-1	150	0	82.17	0	32.92	20	0	4	1	1
1	1	29	17	5	0	0	0	140	20.36	2	-1	74.48	0	87.04	0	28.36	20	0	3	1	1
1	1	29	18	2	0	0	0	290.2	0.02	3	-1	249	0	32	0	2.26	20	0	2	1	1
1	1	29	19	2	0	0	0	236.3	20	3	-1	265	0	32	0	24.39	20	0	2	1	1
1	1	29	20	4	0	0	0	132.67	14.22	1	-1	333.29	0	91.84	0	17.29	20	0	1	1	1
1	1	30	1	2	10.2	10.2	0	202.47	20.02	2	-1	180.01	0	45	0	23.3	2	0	3	1	1
1	1	30	2	5	10.2	10.2	0	202.9	73.69	3	-1	345.29	10.51	73.69	0	84.2	2	1	3	1	1
1	1	30	3	4	5.6	5.6	0	111.47	16.69	2	-1	167.1	0	69.42	0	17.69	2	0	1	1	1
1	1	30	4	5	7.4	7.4	0	146.5	10	3	-1	151.21	0	73.69	0	2.89	2	0	3	1	1
1	1	30	5	2	12	12	0	239.8	11	2	-1	134	0	45	0	17.08	2	0	3	1	1
1	1	30	6	3	5.6	5.6	0	110	99.59	1	-1	161.65	-2	99.59	0	97.59	2	1	1	1	1
1	1	30	7	1	8.7	8.7	0	173.46	9	2	-1	44	0	18.08	0	22.59	2	0	4	1	1
1	1	30	8	1	10.1	10.1	0	200.6	18.08	4	-1	0	4	18.08	0	22.08	2	1	4	1	0
1	1	30	9	5	10	10	0	198.25	56.48	3	-1	471.86	0	73.69	0	58.48	2	0	3	1	1
1	1	30	10	4	6.9	6.9	0	136.21	51.16	3	-1	232.19	0	69.42	0	54.45	2	0	1	1	1
1	1	30	11	3	5.8	5.8	0	114.3	85.44	1	-1	509.65	0	99.59	0	85.44	2	0	1	1	1
1	1	30	12	3	8.3	8.3	0	165.04	25.22	2	-1	165.27	0	99.59	0	28.91	2	0	1	1	1
1	1	30	13	4	5.4	5.4	0	106.27	69.42	1	-1	422.73	0	69.42	0	69.42	2	1	1	1	1
1	1	30	14	1	12.7	12.7	0	253.91	10.36	2	-1	453.32	0	18.08	0	15.36	2	0	4	1	1
1	1	30	15	3	8.6	8.6	0	170.64	68.07	3	-1	235.05	0	99.59	0	72.27	2	0	1	1	1
1	1	30	16	1	6.7	6.7	0	132	7	3	-1	150	0	18.08	0	9.32	2	0	4	1	1
1	1	30	17	5	7.1	7.1	0	140	20.63	2	-1	74.48	0	73.69	0	28.63	2	0	3	1	1
1	1	30	18	2	14.6	14.6	0	290.2	16	3	-1	249	0	45	0	25.81	2	0	3	1	1
1	1	30	19	2	12	12	0	239.7	45	3	-1	310	3.4	45	0	48.4	2	1	3	1	1
1	1	30	20	4	6.7	6.7	0	132.67	3.52	1	-1	333.29	0	69.42	0	5.29	2	0	1	1	1

## Sheet: Session2_SP_StandardPool
SessionID	AucType	Period	Subject	Group	Profit	TotalProfit	bankrpt	balance	bid	charity	draw	donation	earned	price	tie	value	vlink	win	winch	Chround	CharityDummy
2	2	1	1	1	0	0	0	100	52	1	-1	0	0	52	0	70.69	1	0	-1	0	0
2	2	1	2	1	0	0	0	100	12	4	-1	0	0	52	0	7.08	1	0	-1	0	0
2	2	1	3	2	0	0	0	100	7.4	3	-1	0	0	70	0	7.5	1	0	-1	0	0
2	2	1	4	4	0	0	0	100	10	2	-1	0	0	18	0	11.25	1	0	-1	0	0
2	2	1	5	2	0	0	0	129.38	74.38	4	-1	0	29.38	70	0	99.38	1	1	-1	0	0
2	2	1	6	5	0	0	0	100	25	3	-1	0	0	27.01	0	27.29	1	0	-1	0	0
2	2	1	7	4	0	0	0	109.8	27	1	-1	0	9.8	18	0	27.8	1	1	-1	0	0
2	2	1	8	5	0	0	0	162.82	89.8	3	-1	0	62.82	27.01	0	89.83	1	1	-1	0	0
2	2	1	9	3	0	0	0	102.52	42.52	1	-1	0	2.52	40	0	42.52	1	1	-1	0	0
2	2	1	10	4	0	0	0	100	18	3	-1	0	0	18	0	19.31	1	0	-1	0	0
2	2	1	11	3	0	0	0	100	24	1	-1	0	0	40	0	24.94	1	0	-1	0	0
2	2	1	12	2	0	0	0	100	10	2	-1	0	0	70	0	31.28	1	0	-1	0	0
2	2	1	13	3	0	0	0	100	40	4	-1	0	0	40	0	53.66	1	0	-1	0	0
2	2	1	14	2	0	0	0	100	70	3	-1	0	0	70	0	73.08	1	0	-1	0	0
2	2	1	15	5	0	0	0	100	12	3	-1	0	0	27.01	0	15.46	1	0	-1	0	0
2	2	1	16	1	0	0	0	112.17	80	4	-1	0	12.17	52	0	64.17	1	1	-1	0	0
2	2	1	17	5	0	0	0	100	27.01	1	-1	0	0	27.01	0	27.01	1	0	-1	0	0
2	2	1	18	1	0	0	0	100	20.54	4	-1	0	0	52	0	20.54	1	0	-1	0	0
2	2	1	19	3	0	0	0	100	2	4	-1	0	0	40	0	31.42	1	0	-1	0	0
2	2	1	20	4	0	0	0	100	18	2	-1	0	0	18	0	16	1	0	-1	0	0
2	2	2	1	1	0	0	0	100	20.3	1	-1	0	0	25.81	0	23.3	2	0	-1	0	0
2	2	2	2	1	0	0	0	158.39	150	4	-1	0	58.39	25.81	0	84.2	2	1	-1	0	0
2	2	2	3	2	0	0	0	100	25	3	-1	0	0	25	0	17.69	2	0	-1	0	0
2	2	2	4	4	0	0	0	100	5	2	-1	0	0	22.59	0	2.89	2	0	-1	0	0
2	2	2	5	2	0	0	0	129.38	17	4	-1	0	0	25	0	17.08	2	0	-1	0	0
2	2	2	6	5	0	0	0	120.59	80	3	-1	0	20.59	77	0	97.59	2	1	-1	0	0
2	2	2	7	4	0	0	0	109.8	22.59	1	-1	0	0	22.59	0	22.59	2	0	-1	0	0
2	2	2	8	5	0	0	0	162.82	22.07	3	-1	0	0	77	0	22.08	2	0	-1	0	0
2	2	2	9	3	0	0	0	102.52	58.48	1	-1	0	0	58.48	0	58.48	2	0	-1	0	0
2	2	2	10	4	0	0	0	131.86	54.25	3	-1	0	31.86	22.59	0	54.45	2	1	-1	0	0
2	2	2	11	3	0	0	0	126.96	60	1	-1	0	26.96	58.48	0	85.44	2	1	-1	0	0
2	2	2	12	2	0	0	0	103.91	28.91	2	-1	0	3.91	25	0	28.91	2	1	-1	0	0
2	2	2	13	3	0	0	0	100	45	4	-1	0	0	58.48	0	69.42	2	0	-1	0	0
2	2	2	14	2	0	0	0	100	15	3	-1	0	0	25	0	15.36	2	0	-1	0	0
2	2	2	15	5	0	0	0	100	77	3	-1	0	0	77	0	72.27	2	0	-1	0	0
2	2	2	16	1	0	0	0	112.17	10	4	-1	0	0	25.81	0	9.32	2	0	-1	0	0
2	2	2	17	5	0	0	0	100	28.63	1	-1	0	0	77	0	28.63	2	0	-1	0	0
2	2	2	18	1	0	0	0	100	25.81	4	-1	0	0	25.81	0	25.81	2	0	-1	0	0
2	2	2	19	3	0	0	0	100	36	4	-1	0	0	58.48	0	48.4	2	0	-1	0	0
2	2	2	20	4	0	0	0	100	5.3	2	-1	0	0	22.59	0	5.29	2	0	-1	0	0
2	2	3	1	1	0	0	0	100	17	1	-1	0	0	51.7	0	18.87	3	0	-1	0	0
2	2	3	2	1	0	0	0	168.13	120	4	-1	0	9.74	51.7	0	61.44	3	1	-1	0	0
2	2	3	3	2	0	0	0	100	72	3	-1	0	0	81.41	0	91.18	3	0	-1	0	0
2	2	3	4	4	0	0	0	45.22	120	2	-1	0	-54.78	100	0	45.22	3	1	-1	0	0
2	2	3	5	2	0	0	0	129.38	55.08	4	-1	0	0	81.41	0	72.08	3	0	-1	0	0
2	2	3	6	5	0	0	0	120.59	55	3	-1	0	0	55	0	57.38	3	0	-1	0	0
2	2	3	7	4	0	0	0	109.8	100	1	-1	0	0	100	0	96.05	3	0	-1	0	0
2	2	3	8	5	0	0	0	162.82	40.29	3	-1	0	0	55	0	40.3	3	0	-1	0	0
2	2	3	9	3	0	0	0	133.55	94.73	1	-1	0	31.03	63.7	0	94.73	3	1	-1	0	0
2	2	3	10	4	0	0	0	131.86	67.52	3	-1	0	0	100	0	67.61	3	0	-1	0	0
2	2	3	11	3	0	0	0	126.96	63.7	1	-1	0	0	63.7	0	96.99	3	0	-1	0	0
2	2	3	12	2	0	0	0	103.91	81.41	2	-1	0	0	81.41	0	81.41	3	0	-1	0	0
2	2	3	13	3	0	0	0	100	55	4	-1	0	0	63.7	0	88.38	3	0	-1	0	0
2	2	3	14	2	0	0	0	102.36	83	3	-1	0	2.35999	81.41	0	83.77	3	1	-1	0	0
2	2	3	15	5	0	0	0	100	37	3	-1	0	0	55	0	29.16	3	0	-1	0	0
2	2	3	16	1	0	0	0	112.17	50	4	-1	0	0	51.7	0	40.5	3	0	-1	0	0
2	2	3	17	5	0	0	0	131.12	86.12	1	-1	0	31.12	55	0	86.12	3	1	-1	0	0
2	2	3	18	1	0	0	0	100	51.7	4	-1	0	0	51.7	0	51.7	3	0	-1	0	0
2	2	3	19	3	0	0	0	100	50	4	-1	0	0	63.7	0	61.54	3	0	-1	0	0
2	2	3	20	4	0	0	0	100	40	2	-1	0	0	100	0	36.08	3	0	-1	0	0
2	2	4	1	1	0	0	0	100	79.1	1	-1	0	0	79.1	0	88.76	4	0	-1	0	0
2	2	4	2	1	0	0	0	168.13	47	4	-1	0	0	79.1	0	74.77	4	0	-1	0	0
2	2	4	3	2	0	0	0	100	38	3	-1	0	0	40.69	0	38.85	4	0	-1	0	0
2	2	4	4	4	0	0	0	47.87	86.9	2	-1	0	2.65	84.25	0	86.9	4	1	-1	0	0
2	2	4	5	2	0	0	0	162.31	70.62	4	-1	0	32.93	40.69	0	73.62	4	1	-1	0	0
2	2	4	6	5	0	0	0	120.59	44	3	-1	0	0	53.29	0	45.01	4	0	-1	0	0
2	2	4	7	4	0	0	0	109.8	10	1	-1	0	0	84.25	0	8.08	4	0	-1	0	0
2	2	4	8	5	0	0	0	162.82	53.29	3	-1	0	0	53.29	0	53.3	4	0	-1	0	0
2	2	4	9	3	0	0	0	133.55	5.67	1	-1	0	0	50	0	5.67	4	0	-1	0	0
2	2	4	10	4	0	0	0	131.86	84.25	3	-1	0	0	84.25	0	84.29	4	0	-1	0	0
2	2	4	11	3	0	0	0	126.96	50	1	-1	0	0	50	0	55.2	4	0	-1	0	0
2	2	4	12	2	0	0	0	103.91	0.15	2	-1	0	0	40.69	0	0.15	4	0	-1	0	0
2	2	4	13	3	0	0	0	138.54	65.85	4	-1	0	38.54	50	0	88.54	4	1	-1	0	0
2	2	4	14	2	0	0	0	102.36	40.69	3	-1	0	0	40.69	0	40.69	4	0	-1	0	0
2	2	4	15	5	0	0	0	96.38	90	3	-1	0	-3.62	53.29	0	49.67	4	1	-1	0	0
2	2	4	16	1	0	0	0	112.17	55	4	-1	0	0	79.1	0	49.36	4	0	-1	0	0
2	2	4	17	5	0	0	0	131.12	36	1	-1	0	0	53.29	0	36	4	0	-1	0	0
2	2	4	18	1	0	0	0	113.45	92.56	4	-1	0	13.45	79.1	0	92.55	4	1	-1	0	0
2	2	4	19	3	0	0	0	100	2	4	-1	0	0	50	0	27.67	4	0	-1	0	0
2	2	4	20	4	0	0	0	100	50	2	-1	0	0	84.25	0	46.7	4	0	-1	0	0
2	2	5	1	1	0	0	0	100	28	1	-1	0	0	28	0	26.26	5	0	-1	0	0
2	2	5	2	1	0	0	0	185.72	96	4	-1	0	17.59	28	0	45.59	5	1	-1	0	0
2	2	5	3	2	0	0	0	100	43	3	-1	0	0	66	0	45.4	5	0	-1	0	0
2	2	5	4	4	0	0	0	47.87	30	2	-1	0	0	90	0	28.59	5	0	-1	0	0
2	2	5	5	2	0	0	0	162.31	0.57	4	-1	0	0	66	0	0.58	5	0	-1	0	0
2	2	5	6	5	0	0	0	120.59	41	3	-1	0	0	71	0	42.88	5	0	-1	0	0
2	2	5	7	4	0	0	0	109.8	20	1	-1	0	0	90	0	14.91	5	0	-1	0	0
2	2	5	8	5	0	0	0	162.82	64.84	3	-1	0	0	71	0	64.85	5	0	-1	0	0
2	2	5	9	3	0	0	0	133.55	21.36	1	-1	0	0	59.73	0	21.36	5	0	-1	0	0
2	2	5	10	4	0	0	0	139.32	97.45	3	-1	0	7.46	90	0	97.46	5	1	-1	0	0
2	2	5	11	3	0	0	0	126.96	59.73	1	-1	0	0	59.73	0	69.95	5	0	-1	0	0
2	2	5	12	2	0	0	0	129.63	91.72	2	-1	0	25.72	66	0	91.72	5	1	-1	0	0
2	2	5	13	3	0	0	0	138.54	5	4	-1	0	0	59.73	0	8.95	5	0	-1	0	0
2	2	5	14	2	0	0	0	102.36	66	3	-1	0	0	66	0	66.51	5	0	-1	0	0
2	2	5	15	5	0	0	0	96.38	71	3	-1	0	0	71	0	71.41	5	0	-1	0	0
2	2	5	16	1	0	0	0	112.17	20	4	-1	0	0	28	0	23.88	5	0	-1	0	0
2	2	5	17	5	0	0	0	154.6	94	1	-1	0	23.48	71	0	94.48	5	1	-1	0	0
2	2	5	18	1	0	0	0	113.45	20.26	4	-1	0	0	28	0	20.25	5	0	-1	0	0
2	2	5	19	3	0	0	0	119.94	77	4	-1	0	19.94	59.73	0	79.67	5	1	-1	0	0
2	2	5	20	4	0	0	0	100	90	2	-1	0	0	90	0	87.12	5	0	-1	0	0
2	2	6	1	1	0	0	0	100	50	1	-1	0	0	50	0	47.03	15	0	4	1	1
2	2	6	2	1	0	0	0	206.78	156	4	-1	0	21.06	50	0	71.06	15	1	4	1	0
2	2	6	3	2	0	0	0	100	75	3	-1	0	0	75	0	78.28	15	0	2	1	1
2	2	6	4	4	0	0	0	47.87	65	2	-1	0	0	70	0	60.35	15	0	2	1	1
2	2	6	5	2	0	0	0	162.31	60.57	4	-1	0	0	75	0	61.57	15	0	2	1	0
2	2	6	6	5	0	0	0	120.59	2	3	-1	0	0	34.41	0	2.36	15	0	3	1	1
2	2	6	7	4	0	0	0	109.8	70	1	-1	0	0	70	0	60.5	15	0	2	1	1
2	2	6	8	5	0	0	0	198.73	71.01	3	-1	34.41	35.91	34.41	0	70.32	15	1	3	1	1
2	2	6	9	3	0	0	0	140.54	80.99	1	-1	74	6.99	74	0	80.99	15	1	1	1	1
2	2	6	10	4	0	0	0	139.32	30	3	-1	0	0	70	0	28.57	15	0	2	1	1
2	2	6	11	3	0	0	0	126.96	74	1	-1	0	0	74	0	90.58	15	0	1	1	1
2	2	6	12	2	0	0	0	138.4	83.77	2	-1	75	8.77	75	0	83.77	15	1	2	1	1
2	2	6	13	3	0	0	0	138.54	55.36	4	-1	0	0	74	0	91.74	15	0	1	1	0
2	2	6	14	2	0	0	0	102.36	1.98	3	-1	0	0	75	0	1.98	15	0	2	1	1
2	2	6	15	5	0	0	0	96.38	20	3	-1	0	0	34.41	0	22.52	15	0	3	1	1
2	2	6	16	1	0	0	0	112.17	50	4	-1	0	0	50	0	43.61	15	0	4	1	0
2	2	6	17	5	0	0	0	154.6	34.41	1	-1	0	0	34.41	0	34.41	15	0	3	1	1
2	2	6	18	1	0	0	0	113.45	1	4	-1	0	0	50	0	64.02	15	0	4	1	0
2	2	6	19	3	0	0	0	119.94	0	4	-1	0	0	74	0	51.33	15	0	1	1	0
2	2	6	20	4	0	0	0	108	90	2	-1	70	8	70	0	78	15	1	2	1	1
2	2	7	1	1	0	0	0	100	28	1	-1	0	0	45	0	22.78	16	0	4	1	1
2	2	7	2	1	0	0	0	187.16	85	4	-1	0	-19.62	45	0	25.38	16	1	4	1	0
2	2	7	3	2	0	0	0	100	44	3	-1	0	0	44	0	44.99	16	0	4	1	1
2	2	7	4	4	0	0	0	47.87	100	2	-1	0	0	100	0	17.35	16	0	2	1	1
2	2	7	5	2	0	0	0	214.07	95	4	-1	0	51.76	44	0	95.76	16	1	4	1	0
2	2	7	6	5	0	0	0	129.39	60	3	-1	53.26	8.8	53.26	0	62.06	16	1	3	1	1
2	2	7	7	4	0	0	0	109.8	81.23	1	-1	0	0	100	0	81.23	16	0	2	1	1
2	2	7	8	5	0	0	0	198.73	53.26	3	-1	34.41	0	53.26	0	43.25	16	0	3	1	1
2	2	7	9	3	0	0	0	140.54	54.25	1	-1	74	0	54.25	0	54.25	16	0	4	1	1
2	2	7	10	4	0	0	0	139.32	55	3	-1	0	0	100	0	40.92	16	0	2	1	1
2	2	7	11	3	0	0	0	126.96	25	1	-1	0	0	54.25	0	25.47	16	0	4	1	1
2	2	7	12	2	0	0	0	138.4	35	2	-1	75	0	44	0	35.24	16	0	4	1	1
2	2	7	13	3	0	0	0	154.24	55	4	-1	0	15.7	54.25	0	69.95	16	1	4	1	0
2	2	7	14	2	0	0	0	102.36	23.85	3	-1	0	0	44	0	23.85	16	0	4	1	1
2	2	7	15	5	0	0	0	96.38	50	3	-1	0	0	53.26	0	49.15	16	0	3	1	1
2	2	7	16	1	0	0	0	112.17	45	4	-1	0	0	45	0	38.08	16	0	4	1	0
2	2	7	17	5	0	0	0	154.6	47	1	-1	0	0	53.26	0	46.36	16	0	3	1	1
2	2	7	18	1	0	0	0	113.45	1	4	-1	0	0	45	0	41.44	16	0	4	1	0
2	2	7	19	3	0	0	0	119.94	0	4	-1	0	0	54.25	0	53.37	16	0	4	1	0
2	2	7	20	4	0	0	0	105.56	115	2	-1	170	-2.44	100	0	97.56	16	1	2	1	1
2	2	8	1	1	0	0	0	100	20	1	-1	0	0	50.1	0	18.87	3	0	4	1	1
2	2	8	2	1	0	0	0	198.5	90.44	4	-1	0	11.34	50.1	0	61.44	3	1	4	1	0
2	2	8	3	2	0	0	0	108.18	88	3	-1	83	8.18	83	0	91.18	3	1	3	1	1
2	2	8	4	4	0	0	1	100	115	2	-1	100.01	-54.79	100.01	0	45.22	3	1	2	1	1
2	2	8	5	2	0	0	0	214.07	72.08	4	-1	0	0	83	0	72.08	3	0	3	1	0
2	2	8	6	5	0	0	0	129.39	56	3	-1	53.26	0	56	0	57.38	3	0	1	1	1
2	2	8	7	4	0	0	0	109.8	96.05	1	-1	0	0	100.01	0	96.05	3	0	2	1	1
2	2	8	8	5	0	0	0	198.73	50.3	3	-1	34.41	0	56	0	40.3	3	0	1	1	1
2	2	8	9	3	0	0	0	147.37	94.73	1	-1	161.9	6.83	87.9	0	94.73	3	1	1	1	1
2	2	8	10	4	0	0	0	139.32	100.01	3	-1	0	0	100.01	0	67.61	3	0	2	1	1
2	2	8	11	3	0	0	0	126.96	87.9	1	-1	0	0	87.9	0	96.99	3	0	1	1	1
2	2	8	12	2	0	0	0	138.4	81.41	2	-1	75	0	83	0	81.41	3	0	3	1	1
2	2	8	13	3	0	0	0	154.24	66.66	4	-1	0	0	87.9	0	88.38	3	0	1	1	0
2	2	8	14	2	0	0	0	102.36	83	3	-1	0	0	83	0	83.77	3	0	3	1	1
2	2	8	15	5	0	0	0	96.38	27.54	3	-1	0	0	56	0	29.16	3	0	1	1	1
2	2	8	16	1	0	0	0	112.17	50.1	4	-1	0	0	50.1	0	40.5	3	0	4	1	0
2	2	8	17	5	0	0	0	184.72	88	1	-1	56	30.12	56	0	86.12	3	1	1	1	1
2	2	8	18	1	0	0	0	113.45	1	4	-1	0	0	50.1	0	51.7	3	0	4	1	0
2	2	8	19	3	0	0	0	119.94	0	4	-1	0	0	87.9	0	61.54	3	0	1	1	0
2	2	8	20	4	0	0	0	105.56	36.08	2	-1	170	0	100.01	0	36.08	3	0	2	1	1
2	2	9	1	1	0	0	0	100	15	1	-1	0	0	100	0	12.66	14	0	4	1	1
2	2	9	2	1	0	0	0	178.2	200	4	-1	0	-20.3	100	0	79.7	14	1	4	1	0
2	2	9	3	2	0	0	0	108.18	45.88	3	-1	83	0	82.86	0	45.9	14	0	2	1	1
2	2	9	4	4	0	0	1	100	25	2	-1	100.01	0	99	0	23.81	14	0	3	1	1
2	2	9	5	2	0	0	0	214.07	82.86	4	-1	0	0	82.86	0	82.86	14	0	2	1	0
2	2	9	6	5	0	0	0	129.39	18.4	3	-1	53.26	0	32	0	18.4	14	0	3	1	1
2	2	9	7	4	0	0	0	109.8	32.15	1	-1	0	0	99	0	32.15	14	0	3	1	1
2	2	9	8	5	0	0	0	204.36	40.63	3	-1	66.41	5.63	32	0	37.63	14	1	3	1	1
2	2	9	9	3	0	0	0	155.98	93.61	1	-1	246.9	8.61	85	0	93.61	14	1	1	1	1
2	2	9	10	4	0	0	0	139.68	126	3	-1	99	0.360001	99	0	99.36	14	1	3	1	1
2	2	9	11	3	0	0	0	126.96	85	1	-1	0	0	85	0	87.18	14	0	1	1	1
2	2	9	12	2	0	0	0	143.73	88.19	2	-1	157.86	5.33	82.86	0	88.19	14	1	2	1	1
2	2	9	13	3	0	0	0	154.24	25	4	-1	0	0	85	0	31.22	14	0	1	1	0
2	2	9	14	2	0	0	0	102.36	8	3	-1	0	0	82.86	0	8.16	14	0	2	1	1
2	2	9	15	5	0	0	0	96.38	32	3	-1	0	0	32	0	29.17	14	0	3	1	1
2	2	9	16	1	0	0	0	112.17	100	4	-1	0	0	100	0	79.04	14	0	4	1	0
2	2	9	17	5	0	0	0	184.72	0	1	-1	56	0	32	0	5.28	14	0	3	1	1
2	2	9	18	1	0	0	0	113.45	1	4	-1	0	0	100	0	96.28	14	0	4	1	0
2	2	9	19	3	0	0	0	119.94	0	4	-1	0	0	85	0	33.83	14	0	1	1	0
2	2	9	20	4	0	0	0	105.56	99	2	-1	170	0	99	0	92.25	14	0	3	1	1
2	2	10	1	1	0	0	0	94.52	83	1	-1	76.17	-5.48	76.17	0	70.69	1	1	1	1	1
2	2	10	2	1	0	0	0	178.2	25	4	-1	0	0	76.17	0	7.08	1	0	1	1	0
2	2	10	3	2	0	0	0	108.18	30	3	-1	83	0	73	0	7.5	1	0	4	1	1
2	2	10	4	4	0	0	1	100	11	2	-1	100.01	0	19.31	0	11.25	1	0	1	1	1
2	2	10	5	2	0	0	0	240.45	99.38	4	-1	0	26.38	73	0	99.38	1	1	4	1	0
2	2	10	6	5	0	0	0	129.39	27.2	3	-1	53.26	0	30	0	27.29	1	0	3	1	1
2	2	10	7	4	0	0	0	118.29	27.8	1	-1	19.31	8.49	19.31	0	27.8	1	1	1	1	1
2	2	10	8	5	0	0	0	264.19	79.03	3	-1	96.41	59.83	30	0	89.83	1	1	3	1	1
2	2	10	9	3	0	0	0	155.98	42.52	1	-1	246.9	0	42.52	0	42.52	1	0	4	1	1
2	2	10	10	4	0	0	0	139.68	19.31	3	-1	99	0	19.31	0	19.31	1	0	1	1	1
2	2	10	11	3	0	0	0	126.96	24.94	1	-1	0	0	42.52	0	24.94	1	0	4	1	1
2	2	10	12	2	0	0	0	143.73	31	2	-1	157.86	0	73	0	31.28	1	0	4	1	1
2	2	10	13	3	0	0	0	165.38	52	4	-1	0	11.14	42.52	0	53.66	1	1	4	1	0
2	2	10	14	2	0	0	0	102.36	73	3	-1	0	0	73	0	73.08	1	0	4	1	1
2	2	10	15	5	0	0	0	96.38	29	3	-1	0	0	30	0	15.46	1	0	3	1	1
2	2	10	16	1	0	0	0	112.17	76.17	4	-1	0	0	76.17	0	64.17	1	0	1	1	0
2	2	10	17	5	0	0	0	184.72	30	1	-1	56	0	30	0	27.01	1	0	3	1	1
2	2	10	18	1	0	0	0	113.45	1	4	-1	0	0	76.17	0	20.54	1	0	1	1	0
2	2	10	19	3	0	0	0	119.94	0	4	-1	0	0	42.52	0	31.42	1	0	4	1	0
2	2	10	20	4	0	0	0	105.56	18	2	-1	170	0	19.31	0	16	1	0	1	1	1
2	2	11	1	1	0	0	0	94.52	39	1	-1	76.17	0	39	0	39.13	11	0	-1	0	0
2	2	11	2	1	0	0	0	165.04	84.25	4	-1	0	-13.16	39	0	25.84	11	1	-1	0	0
2	2	11	3	2	0	0	0	121.99	80	3	-1	83	13.81	66.73	0	80.54	11	1	-1	0	0
2	2	11	4	4	0	0	1	135.41	95	2	-1	100.01	35.41	50	0	85.41	11	1	-1	0	0
2	2	11	5	2	0	0	0	240.45	4.07	4	-1	0	0	66.73	0	4.07	11	0	-1	0	0
2	2	11	6	5	0	0	0	129.39	24.39	3	-1	53.26	0	24.39	0	24.39	11	0	-1	0	0
2	2	11	7	4	0	0	0	118.29	50	1	-1	19.31	0	50	0	45.29	11	0	-1	0	0
2	2	11	8	5	0	0	0	264.19	20.01	3	-1	96.41	0	24.39	0	20.41	11	0	-1	0	0
2	2	11	9	3	0	0	0	155.98	9.21	1	-1	246.9	0	30	0	9.21	11	0	-1	0	0
2	2	11	10	4	0	0	0	139.68	1	3	-1	99	0	50	0	8.21	11	0	-1	0	0
2	2	11	11	3	0	0	0	126.96	30	1	-1	0	0	30	0	36.21	11	0	-1	0	0
2	2	11	12	2	0	0	0	143.73	66.73	2	-1	157.86	0	66.73	0	66.73	11	0	-1	0	0
2	2	11	13	3	0	0	0	165.38	5	4	-1	0	0	30	0	13.51	11	0	-1	0	0
2	2	11	14	2	0	0	0	102.36	58.04	3	-1	0	0	66.73	0	58.04	11	0	-1	0	0
2	2	11	15	5	0	0	0	151.56	90	3	-1	0	55.18	24.39	0	79.57	11	1	-1	0	0
2	2	11	16	1	0	0	0	112.17	20	4	-1	0	0	39	0	21.85	11	0	-1	0	0
2	2	11	17	5	0	0	0	184.72	0	1	-1	56	0	24.39	0	2.34	11	0	-1	0	0
2	2	11	18	1	0	0	0	113.45	15.94	4	-1	0	0	39	0	15.93	11	0	-1	0	0
2	2	11	19	3	0	0	0	146.57	87	4	-1	0	26.63	30	0	56.63	11	1	-1	0	0
2	2	11	20	4	0	0	0	105.56	16	2	-1	170	0	50	0	15.07	11	0	-1	0	0
2	2	12	1	1	0	0	0	94.52	50.1	1	-1	76.17	0	75	0	50.15	12	0	-1	0	0
2	2	12	2	1	0	0	0	180.22	165	4	-1	0	15.18	75	0	90.18	12	1	-1	0	0
2	2	12	3	2	0	0	0	121.99	20	3	-1	83	0	72.23	0	1.76	12	0	-1	0	0
2	2	12	4	4	0	0	1	135.41	35	2	-1	100.01	0	35	0	57.36	12	0	-1	0	0
2	2	12	5	2	0	0	0	240.45	34.8	4	-1	0	0	72.23	0	34.8	12	0	-1	0	0
2	2	12	6	5	0	0	0	129.39	33.2	3	-1	53.26	0	77.51	0	33.83	12	0	-1	0	0
2	2	12	7	4	0	0	0	118.29	9.63	1	-1	19.31	0	35	0	9.63	12	0	-1	0	0
2	2	12	8	5	0	0	0	252.92	78.01	3	-1	96.41	-11.27	77.51	0	66.24	12	1	-1	0	0
2	2	12	9	3	0	0	0	155.98	36.63	1	-1	246.9	0	55	0	36.63	12	0	-1	0	0
2	2	12	10	4	0	0	0	139.68	32	3	-1	99	0	35	0	26.28	12	0	-1	0	0
2	2	12	11	3	0	0	0	126.96	40.74	1	-1	0	0	55	0	40.74	12	0	-1	0	0
2	2	12	12	2	0	0	0	143.73	72.23	2	-1	157.86	0	72.23	0	72.23	12	0	-1	0	0
2	2	12	13	3	0	0	0	165.38	55	4	-1	0	0	55	0	69.39	12	0	-1	0	0
2	2	12	14	2	0	0	0	127.23	97	3	-1	0	24.87	72.23	0	97.1	12	1	-1	0	0
2	2	12	15	5	0	0	0	151.56	27	3	-1	0	0	77.51	0	32.6	12	0	-1	0	0
2	2	12	16	1	0	0	0	112.17	75	4	-1	0	0	75	0	58.95	12	0	-1	0	0
2	2	12	17	5	0	0	0	184.72	77.51	1	-1	56	0	77.51	0	77.51	12	0	-1	0	0
2	2	12	18	1	0	0	0	113.45	17.34	4	-1	0	0	75	0	17.34	12	0	-1	0	0
2	2	12	19	3	0	0	0	181.02	91	4	-1	0	34.45	55	0	89.45	12	1	-1	0	0
2	2	12	20	4	0	0	0	158.83	95	2	-1	170	53.27	35	0	88.27	12	1	-1	0	0
2	2	13	1	1	0	0	0	94.52	90	1	-1	76.17	0	90	0	89.08	13	0	-1	0	0
2	2	13	2	1	0	0	0	145.91	96	4	-1	0	-34.31	90	0	55.69	13	1	-1	0	0
2	2	13	3	2	0	0	0	121.99	20	3	-1	83	0	57.08	0	3.27	13	0	-1	0	0
2	2	13	4	4	0	0	1	135.41	36	2	-1	100.01	0	36	0	33.15	13	0	-1	0	0
2	2	13	5	2	0	0	0	240.45	57.08	4	-1	0	0	57.08	0	57.08	13	0	-1	0	0
2	2	13	6	5	0	0	0	151.63	61.02	3	-1	53.26	22.24	38.8	0	61.04	13	1	-1	0	0
2	2	13	7	4	0	0	0	133.38	55	1	-1	19.31	15.09	36	0	51.09	13	1	-1	0	0
2	2	13	8	5	0	0	0	252.92	32.19	3	-1	96.41	0	38.8	0	32.19	13	0	-1	0	0
2	2	13	9	3	0	0	0	155.98	57.71	1	-1	246.9	0	90	0	57.71	13	0	-1	0	0
2	2	13	10	4	0	0	0	139.68	19	3	-1	99	0	36	0	15.48	13	0	-1	0	0
2	2	13	11	3	0	0	0	129.77	92.81	1	-1	0	2.81	90	0	92.81	13	1	-1	0	0
2	2	13	12	2	0	0	0	143.73	20	2	-1	157.86	0	57.08	0	20.4	13	0	-1	0	0
2	2	13	13	3	0	0	0	165.38	56.76	4	-1	0	0	90	0	76.77	13	0	-1	0	0
2	2	13	14	2	0	0	0	146.99	76.84	3	-1	0	19.76	57.08	0	76.84	13	1	-1	0	0
2	2	13	15	5	0	0	0	151.56	9	3	-1	0	0	38.8	0	11.26	13	0	-1	0	0
2	2	13	16	1	0	0	0	112.17	75	4	-1	0	0	90	0	55.43	13	0	-1	0	0
2	2	13	17	5	0	0	0	184.72	38.8	1	-1	56	0	38.8	0	38.8	13	0	-1	0	0
2	2	13	18	1	0	0	0	113.45	77.59	4	-1	0	0	90	0	77.59	13	0	-1	0	0
2	2	13	19	3	0	0	0	181.02	90	4	-1	0	0	90	0	11.83	13	0	-1	0	0
2	2	13	20	4	0	0	0	158.83	3	2	-1	170	0	36	0	2.09	13	0	-1	0	0
2	2	14	1	1	0	0	0	94.52	13	1	-1	76.17	0	120	0	12.66	14	0	-1	0	0
2	2	14	2	1	0	0	0	105.61	150	4	-1	0	-40.3	120	0	79.7	14	1	-1	0	0
2	2	14	3	2	0	0	0	121.99	45.8	3	-1	83	0	82.86	0	45.9	14	0	-1	0	0
2	2	14	4	4	0	0	1	135.41	25	2	-1	100.01	0	110	0	23.81	14	0	-1	0	0
2	2	14	5	2	0	0	0	240.45	82.86	4	-1	0	0	82.86	0	82.86	14	0	-1	0	0
2	2	14	6	5	0	0	0	151.63	18.4	3	-1	53.26	0	22.17	0	18.4	14	0	-1	0	0
2	2	14	7	4	0	0	0	133.38	35	1	-1	19.31	0	110	0	32.15	14	0	-1	0	0
2	2	14	8	5	0	0	0	268.38	36	3	-1	96.41	15.46	22.17	0	37.63	14	1	-1	0	0
2	2	14	9	3	0	0	0	155.98	93.61	1	-1	246.9	0	93.61	0	93.61	14	0	-1	0	0
2	2	14	10	4	0	0	0	129.04	115	3	-1	99	-10.64	110	0	99.36	14	1	-1	0	0
2	2	14	11	3	0	0	0	129.77	87.18	1	-1	0	0	93.61	0	87.18	14	0	-1	0	0
2	2	14	12	2	0	0	0	149.06	88.19	2	-1	157.86	5.33	82.86	0	88.19	14	1	-1	0	0
2	2	14	13	3	0	0	0	165.38	25	4	-1	0	0	93.61	0	31.22	14	0	-1	0	0
2	2	14	14	2	0	0	0	146.99	8.16	3	-1	0	0	82.86	0	8.16	14	0	-1	0	0
2	2	14	15	5	0	0	0	151.56	22.17	3	-1	0	0	22.17	0	29.17	14	0	-1	0	0
2	2	14	16	1	0	0	0	112.17	120	4	-1	0	0	120	0	79.04	14	0	-1	0	0
2	2	14	17	5	0	0	0	184.72	5.28	1	-1	56	0	22.17	0	5.28	14	0	-1	0	0
2	2	14	18	1	0	0	0	113.45	96.28	4	-1	0	0	120	0	96.28	14	0	-1	0	0
2	2	14	19	3	0	0	0	121.24	100	4	-1	0	-59.78	93.61	0	33.83	14	1	-1	0	0
2	2	14	20	4	0	0	0	158.83	110	2	-1	170	0	110	0	92.25	14	0	-1	0	0
2	2	15	1	1	0	0	0	94.52	57.03	1	-1	76.17	0	64.02	0	47.03	15	0	-1	0	0
2	2	15	2	1	0	0	0	112.65	72	4	-1	0	7.04	64.02	0	71.06	15	1	-1	0	0
2	2	15	3	2	0	0	0	121.99	78	3	-1	83	0	78	0	78.28	15	0	-1	0	0
2	2	15	4	4	0	0	1	135.41	50	2	-1	100.01	0	65	0	60.35	15	0	-1	0	0
2	2	15	5	2	0	0	0	240.45	61.57	4	-1	0	0	78	0	61.57	15	0	-1	0	0
2	2	15	6	5	0	0	0	151.63	2.36	3	-1	53.26	0	34.41	0	2.36	15	0	-1	0	0
2	2	15	7	4	0	0	0	133.38	65	1	-1	19.31	0	65	0	60.5	15	0	-1	0	0
2	2	15	8	5	0	0	0	304.29	70.02	3	-1	96.41	35.91	34.41	0	70.32	15	1	-1	0	0
2	2	15	9	3	0	0	0	155.98	80.99	1	-1	246.9	0	90.58	0	80.99	15	0	-1	0	0
2	2	15	10	4	0	0	0	129.04	30	3	-1	99	0	65	0	28.57	15	0	-1	0	0
2	2	15	11	3	0	0	0	129.77	90.58	1	-1	0	0	90.58	0	90.58	15	0	-1	0	0
2	2	15	12	2	0	0	0	154.83	83.77	2	-1	157.86	5.77	78	0	83.77	15	1	-1	0	0
2	2	15	13	3	0	0	0	166.54	91.56	4	-1	0	1.16	90.58	0	91.74	15	1	-1	0	0
2	2	15	14	2	0	0	0	146.99	1.98	3	-1	0	0	78	0	1.98	15	0	-1	0	0
2	2	15	15	5	0	0	0	151.56	29	3	-1	0	0	34.41	0	22.52	15	0	-1	0	0
2	2	15	16	1	0	0	0	112.17	60	4	-1	0	0	64.02	0	43.61	15	0	-1	0	0
2	2	15	17	5	0	0	0	184.72	34.41	1	-1	56	0	34.41	0	34.41	15	0	-1	0	0
2	2	15	18	1	0	0	0	113.45	64.02	4	-1	0	0	64.02	0	64.02	15	0	-1	0	0
2	2	15	19	3	0	0	0	121.24	40	4	-1	0	0	90.58	0	51.33	15	0	-1	0	0
2	2	15	20	4	0	0	0	171.83	115	2	-1	170	13	65	0	78	15	1	-1	0	0
2	2	16	1	1	0	0	0	94.52	25	1	-1	76.17	0	38.08	0	22.78	16	0	-1	0	0
2	2	16	2	1	0	0	0	112.65	28	4	-1	0	0	38.08	0	25.38	16	0	-1	0	0
2	2	16	3	2	0	0	0	121.99	44.99	3	-1	83	0	44.99	0	44.99	16	0	-1	0	0
2	2	16	4	4	0	0	1	135.41	5	2	-1	100.01	0	85	0	17.35	16	0	-1	0	0
2	2	16	5	2	0	0	0	291.22	95.76	4	-1	0	50.77	44.99	0	95.76	16	1	-1	0	0
2	2	16	6	5	0	0	0	165.54	62.05	3	-1	53.26	13.91	48.15	0	62.06	16	1	-1	0	0
2	2	16	7	4	0	0	0	133.38	85	1	-1	19.31	0	85	0	81.23	16	0	-1	0	0
2	2	16	8	5	0	0	0	304.29	42.99	3	-1	96.41	0	48.15	0	43.25	16	0	-1	0	0
2	2	16	9	3	0	0	0	155.98	54.25	1	-1	246.9	0	54.25	0	54.25	16	0	-1	0	0
2	2	16	10	4	0	0	0	129.04	41	3	-1	99	0	85	0	40.92	16	0	-1	0	0
2	2	16	11	3	0	0	0	129.77	25.47	1	-1	0	0	54.25	0	25.47	16	0	-1	0	0
2	2	16	12	2	0	0	0	154.83	35	2	-1	157.86	0	44.99	0	35.24	16	0	-1	0	0
2	2	16	13	3	0	0	0	182.24	56	4	-1	0	15.7	54.25	0	69.95	16	1	-1	0	0
2	2	16	14	2	0	0	0	146.99	23.85	3	-1	0	0	44.99	0	23.85	16	0	-1	0	0
2	2	16	15	5	0	0	0	151.56	48.15	3	-1	0	0	48.15	0	49.15	16	0	-1	0	0
2	2	16	16	1	0	0	0	112.17	38.08	4	-1	0	0	38.08	0	38.08	16	0	-1	0	0
2	2	16	17	5	0	0	0	184.72	46.36	1	-1	56	0	48.15	0	46.36	16	0	-1	0	0
2	2	16	18	1	0	0	0	116.81	41.44	4	-1	0	3.36	38.08	0	41.44	16	1	-1	0	0
2	2	16	19	3	0	0	0	121.24	0	4	-1	0	0	54.25	0	53.37	16	0	-1	0	0
2	2	16	20	4	0	0	0	184.39	120	2	-1	170	12.56	85	0	97.56	16	1	-1	0	0
2	2	17	1	1	0	0	0	94.52	83	1	-1	76.17	0	90	0	70.54	17	0	-1	0	0
2	2	17	2	1	0	0	0	112.65	90	4	-1	0	0	90	0	73.09	17	0	-1	0	0
2	2	17	3	2	0	0	0	121.99	25	3	-1	83	0	39.03	0	13.74	17	0	-1	0	0
2	2	17	4	4	0	0	1	135.41	38	2	-1	100.01	0	45	0	31.1	17	0	-1	0	0
2	2	17	5	2	0	0	0	291.22	39.03	4	-1	0	0	39.03	0	39.03	17	0	-1	0	0
2	2	17	6	5	0	0	0	165.54	36.04	3	-1	53.26	0	55.52	0	36.04	17	0	-1	0	0
2	2	17	7	4	0	0	0	133.38	45	1	-1	19.31	0	45	0	42.98	17	0	-1	0	0
2	2	17	8	5	0	0	0	304.29	55.52	3	-1	96.41	0	55.52	0	55.53	17	0	-1	0	0
2	2	17	9	3	0	0	0	155.98	42.52	1	-1	246.9	0	42.52	0	42.52	17	0	-1	0	0
2	2	17	10	4	0	0	0	139.66	66	3	-1	99	10.62	45	0	55.62	17	1	-1	0	0
2	2	17	11	3	0	0	0	129.77	38.61	1	-1	0	0	42.52	0	38.61	17	0	-1	0	0
2	2	17	12	2	0	0	0	154.83	27	2	-1	157.86	0	39.03	0	26.95	17	0	-1	0	0
2	2	17	13	3	0	0	0	182.24	5	4	-1	0	0	42.52	0	17.69	17	0	-1	0	0
2	2	17	14	2	0	0	0	170.84	62.88	3	-1	0	23.85	39.03	0	62.88	17	1	-1	0	0
2	2	17	15	5	0	0	0	140.23	59.19	3	-1	0	-11.33	55.52	0	44.19	17	1	-1	0	0
2	2	17	16	1	0	0	0	112.17	30	4	-1	0	0	90	0	27.12	17	0	-1	0	0
2	2	17	17	5	0	0	0	184.72	55.06	1	-1	56	0	55.52	0	55.06	17	0	-1	0	0
2	2	17	18	1	0	0	0	122.7	95.89	4	-1	0	5.89	90	0	95.89	17	1	-1	0	0
2	2	17	19	3	0	0	0	169.65	94	4	-1	0	48.41	42.52	0	90.93	17	1	-1	0	0
2	2	17	20	4	0	0	0	184.39	9	2	-1	170	0	45	0	8.18	17	0	-1	0	0
2	2	18	1	1	0	0	0	85.34	97	1	-1	76.17	-9.18	87	0	77.82	18	1	-1	0	0
2	2	18	2	1	0	0	0	112.65	87	4	-1	0	0	87	0	68.34	18	0	-1	0	0
2	2	18	3	2	0	0	0	121.99	78	3	-1	83	0	78	0	77.32	18	0	-1	0	0
2	2	18	4	4	0	0	1	135.41	2	2	-1	100.01	0	81.01	0	32.11	18	0	-1	0	0
2	2	18	5	2	0	0	0	291.22	34.08	4	-1	0	0	78	0	34.08	18	0	-1	0	0
2	2	18	6	5	0	0	0	165.54	73.97	3	-1	53.26	0	73.97	0	74.97	18	0	-1	0	0
2	2	18	7	4	0	0	0	133.38	60	1	-1	19.31	0	81.01	0	56.08	18	0	-1	0	0
2	2	18	8	5	0	0	0	304.29	7.74	3	-1	96.41	0	73.97	0	7.75	18	0	-1	0	0
2	2	18	9	3	0	0	0	176.24	65.26	1	-1	246.9	20.26	45	0	65.26	18	1	-1	0	0
2	2	18	10	4	0	0	0	139.66	81.01	3	-1	99	0	81.01	0	76.08	18	0	-1	0	0
2	2	18	11	3	0	0	0	129.77	1	1	-1	0	0	45	0	0.98	18	0	-1	0	0
2	2	18	12	2	0	0	0	154.83	38.24	2	-1	157.86	0	78	0	38.24	18	0	-1	0	0
2	2	18	13	3	0	0	0	182.24	45	4	-1	0	0	45	0	58.37	18	0	-1	0	0
2	2	18	14	2	0	0	0	175.93	83.09	3	-1	0	5.09	78	0	83.09	18	1	-1	0	0
2	2	18	15	5	0	0	0	162.8	95.56	3	-1	0	22.57	73.97	0	96.54	18	1	-1	0	0
2	2	18	16	1	0	0	0	112.17	10	4	-1	0	0	87	0	10.85	18	0	-1	0	0
2	2	18	17	5	0	0	0	184.72	11.81	1	-1	56	0	73.97	0	11.81	18	0	-1	0	0
2	2	18	18	1	0	0	0	122.7	63.07	4	-1	0	0	87	0	63.07	18	0	-1	0	0
2	2	18	19	3	0	0	0	169.65	0	4	-1	0	0	45	0	27.89	18	0	-1	0	0
2	2	18	20	4	0	0	0	191.17	100	2	-1	170	6.78	81.01	0	87.79	18	1	-1	0	0
2	2	19	1	1	0	0	0	85.34	9	1	-1	76.17	0	95.3	0	8.49	19	0	-1	0	0
2	2	19	2	1	0	0	0	112.65	95.3	4	-1	0	0	95.3	0	81.23	19	0	-1	0	0
2	2	19	3	2	0	0	0	121.99	25	3	-1	83	0	42.86	0	18.6	19	0	-1	0	0
2	2	19	4	4	0	0	1	135.41	23	2	-1	100.01	0	39.52	0	19.27	19	0	-1	0	0
2	2	19	5	2	0	0	0	291.22	3.35	4	-1	0	0	42.86	0	3.35	19	0	-1	0	0
2	2	19	6	5	0	0	0	165.54	21.04	3	-1	53.26	0	39	0	21.04	19	0	-1	0	0
2	2	19	7	4	0	0	0	189.04	100	1	-1	19.31	55.66	39.52	0	95.18	19	1	-1	0	0
2	2	19	8	5	0	0	0	327.05	61.75	3	-1	96.41	22.76	39	0	61.76	19	1	-1	0	0
2	2	19	9	3	0	0	0	176.24	56.86	1	-1	246.9	0	56.86	0	56.86	19	0	-1	0	0
2	2	19	10	4	0	0	0	139.66	39.52	3	-1	99	0	39.52	0	37.42	19	0	-1	0	0
2	2	19	11	3	0	0	0	129.77	8	1	-1	0	0	56.86	0	7.78	19	0	-1	0	0
2	2	19	12	2	0	0	0	154.83	42.86	2	-1	157.86	0	42.86	0	42.86	19	0	-1	0	0
2	2	19	13	3	0	0	0	182.24	36.36	4	-1	0	0	56.86	0	42.5	19	0	-1	0	0
2	2	19	14	2	0	0	0	181.47	48.4	3	-1	0	5.54	42.86	0	48.4	19	1	-1	0	0
2	2	19	15	5	0	0	0	162.8	39	3	-1	0	0	39	0	38.72	19	0	-1	0	0
2	2	19	16	1	0	0	0	103.83	140	4	-1	0	-8.34	95.3	0	86.96	19	1	-1	0	0
2	2	19	17	5	0	0	0	184.72	28.66	1	-1	56	0	39	0	28.66	19	0	-1	0	0
2	2	19	18	1	0	0	0	122.7	88.76	4	-1	0	0	95.3	0	88.76	19	0	-1	0	0
2	2	19	19	3	0	0	0	170.69	94	4	-1	0	1.04	56.86	0	57.9	19	1	-1	0	0
2	2	19	20	4	0	0	0	191.17	12	2	-1	170	0	39.52	0	10.63	19	0	-1	0	0
2	2	20	1	1	0	0	0	85.34	12	1	-1	76.17	0	12	0	11.5	20	0	-1	0	0
2	2	20	2	1	0	0	0	112.65	1.5	4	-1	0	0	12	0	2.96	20	0	-1	0	0
2	2	20	3	2	0	0	0	139.25	94	3	-1	83	17.26	76.85	0	94.11	20	1	-1	0	0
2	2	20	4	4	0	0	1	156.93	95	2	-1	100.01	21.52	60	0	81.52	20	1	-1	0	0
2	2	20	5	2	0	0	0	291.22	33.91	4	-1	0	0	76.85	0	33.91	20	0	-1	0	0
2	2	20	6	5	0	0	0	165.54	1.63	3	-1	53.26	0	78	0	1.63	20	0	-1	0	0
2	2	20	7	4	0	0	0	189.04	60	1	-1	19.31	0	60	0	54.38	20	0	-1	0	0
2	2	20	8	5	0	0	0	344.22	95.16	3	-1	96.41	17.17	78	0	95.17	20	1	-1	0	0
2	2	20	9	3	0	0	0	201.09	94.54	1	-1	246.9	24.85	69.69	0	94.54	20	1	-1	0	0
2	2	20	10	4	0	0	0	139.66	50	3	-1	99	0	60	0	35.98	20	0	-1	0	0
2	2	20	11	3	0	0	0	129.77	14	1	-1	0	0	69.69	0	14.3	20	0	-1	0	0
2	2	20	12	2	0	0	0	154.83	76.85	2	-1	157.86	0	76.85	0	76.85	20	0	-1	0	0
2	2	20	13	3	0	0	0	182.24	69.69	4	-1	0	0	69.69	0	91.84	20	0	-1	0	0
2	2	20	14	2	0	0	0	181.47	24.28	3	-1	0	0	76.85	0	24.28	20	0	-1	0	0
2	2	20	15	5	0	0	0	162.8	78	3	-1	0	0	78	0	91.6	20	0	-1	0	0
2	2	20	16	1	0	0	0	124.75	40	4	-1	0	20.92	12	0	32.92	20	1	-1	0	0
2	2	20	17	5	0	0	0	184.72	28.36	1	-1	56	0	78	0	28.36	20	0	-1	0	0
2	2	20	18	1	0	0	0	122.7	2.26	4	-1	0	0	12	0	2.26	20	0	-1	0	0
2	2	20	19	3	0	0	0	170.69	0	4	-1	0	0	69.69	0	24.39	20	0	-1	0	0
2	2	20	20	4	0	0	0	191.17	2	2	-1	170	0	60	0	17.29	20	0	-1	0	0
2	2	21	1	1	0	0	0	85.34	80	1	-1	76.17	0	80	0	77.82	18	0	4	1	1
2	2	21	2	1	0	0	0	100.99	94	4	-1	0	-11.66	80	0	68.34	18	1	4	1	0
2	2	21	3	2	0	0	0	139.25	80	3	-1	83	0	80	0	77.32	18	0	3	1	1
2	2	21	4	4	0	0	1	156.93	25	2	-1	100.01	0	84.01	0	32.11	18	0	2	1	1
2	2	21	5	2	0	0	0	291.22	34.08	4	-1	0	0	80	0	34.08	18	0	3	1	0
2	2	21	6	5	0	0	0	165.54	74.5	3	-1	53.26	0	74.5	0	74.97	18	0	3	1	1
2	2	21	7	4	0	0	0	189.04	60	1	-1	19.31	0	84.01	0	56.08	18	0	2	1	1
2	2	21	8	5	0	0	0	344.22	7.74	3	-1	96.41	0	74.5	0	7.75	18	0	3	1	1
2	2	21	9	3	0	0	0	213.35	65.26	1	-1	299.9	12.26	53	0	65.26	18	1	1	1	1
2	2	21	10	4	0	0	0	139.66	84.01	3	-1	99	0	84.01	0	76.08	18	0	2	1	1
2	2	21	11	3	0	0	0	129.77	1	1	-1	0	0	53	0	0.98	18	0	1	1	1
2	2	21	12	2	0	0	0	154.83	38.24	2	-1	157.86	0	80	0	38.24	18	0	3	1	1
2	2	21	13	3	0	0	0	182.24	53	4	-1	0	0	53	0	58.37	18	0	1	1	0
2	2	21	14	2	0	0	0	184.56	83.09	3	-1	80	3.09	80	0	83.09	18	1	3	1	1
2	2	21	15	5	0	0	0	184.84	88	3	-1	74.5	22.04	74.5	0	96.54	18	1	3	1	1
2	2	21	16	1	0	0	0	124.75	12	4	-1	0	0	80	0	10.85	18	0	4	1	0
2	2	21	17	5	0	0	0	184.72	15	1	-1	56	0	74.5	0	11.81	18	0	3	1	1
2	2	21	18	1	0	0	0	122.7	63.07	4	-1	0	0	80	0	63.07	18	0	4	1	0
2	2	21	19	3	0	0	0	170.69	0	4	-1	0	0	53	0	27.89	18	0	1	1	0
2	2	21	20	4	0	0	0	194.95	99	2	-1	254.01	3.78	84.01	0	87.79	18	1	2	1	1
2	2	22	1	1	0	0	0	94.47	40	1	-1	106.17	9.13	30	0	39.13	11	1	1	1	1
2	2	22	2	1	0	0	0	100.99	30	4	-1	0	0	30	0	25.84	11	0	1	1	0
2	2	22	3	2	0	0	0	153.06	81	3	-1	149.73	13.81	66.73	0	80.54	11	1	3	1	1
2	2	22	4	4	0	0	1	190.34	95	2	-1	152.01	33.41	52	0	85.41	11	1	2	1	1
2	2	22	5	2	0	0	0	291.22	4.07	4	-1	0	0	66.73	0	4.07	11	0	3	1	0
2	2	22	6	5	0	0	0	165.54	24.36	3	-1	53.26	0	24.36	0	24.39	11	0	3	1	1
2	2	22	7	4	0	0	0	189.04	50	1	-1	19.31	0	52	0	45.29	11	0	2	1	1
2	2	22	8	5	0	0	0	344.22	20.4	3	-1	96.41	0	24.36	0	20.41	11	0	3	1	1
2	2	22	9	3	0	0	0	213.35	9.21	1	-1	299.9	0	12	0	9.21	11	0	1	1	1
2	2	22	10	4	0	0	0	139.66	7.52	3	-1	99	0	52	0	8.21	11	0	2	1	1
2	2	22	11	3	0	0	0	153.98	35	1	-1	12	24.21	12	0	36.21	11	1	1	1	1
2	2	22	12	2	0	0	0	154.83	66.73	2	-1	157.86	0	66.73	0	66.73	11	0	3	1	1
2	2	22	13	3	0	0	0	182.24	12	4	-1	0	0	12	0	13.51	11	0	1	1	0
2	2	22	14	2	0	0	0	184.56	58.04	3	-1	80	0	66.73	0	58.04	11	0	3	1	1
2	2	22	15	5	0	0	0	240.05	78.87	3	-1	98.86	55.21	24.36	0	79.57	11	1	3	1	1
2	2	22	16	1	0	0	0	124.75	30	4	-1	0	0	30	0	21.85	11	0	1	1	0
2	2	22	17	5	0	0	0	184.72	5	1	-1	56	0	24.36	0	2.34	11	0	3	1	1
2	2	22	18	1	0	0	0	122.7	15.93	4	-1	0	0	30	0	15.93	11	0	1	1	0
2	2	22	19	3	0	0	0	170.69	0	4	-1	0	0	12	0	56.63	11	0	1	1	0
2	2	22	20	4	0	0	0	194.95	52	2	-1	254.01	0	52	0	15.07	11	0	2	1	1
2	2	23	1	1	0	0	0	94.47	80	1	-1	106.17	0	80	0	70.54	17	0	4	1	1
2	2	23	2	1	0	0	0	94.08	85	4	-1	0	-6.91	80	0	73.09	17	1	4	1	0
2	2	23	3	2	0	0	0	153.06	25	3	-1	149.73	0	39.03	0	13.74	17	0	3	1	1
2	2	23	4	4	0	0	1	190.34	35	2	-1	152.01	0	45	0	31.1	17	0	3	1	1
2	2	23	5	2	0	0	0	291.22	39.03	4	-1	0	0	39.03	0	39.03	17	0	3	1	0
2	2	23	6	5	0	0	0	165.54	36.04	3	-1	53.26	0	55.52	0	36.04	17	0	1	1	1
2	2	23	7	4	0	0	0	189.04	45	1	-1	19.31	0	45	0	42.98	17	0	3	1	1
2	2	23	8	5	0	0	0	344.22	55.52	3	-1	96.41	0	55.52	0	55.53	17	0	1	1	1
2	2	23	9	3	0	0	0	213.35	42.52	1	-1	299.9	0	42.52	0	42.52	17	0	4	1	1
2	2	23	10	4	0	0	0	150.28	59.52	3	-1	144	10.62	45	0	55.62	17	1	3	1	1
2	2	23	11	3	0	0	0	153.98	25	1	-1	12	0	42.52	0	38.61	17	0	4	1	1
2	2	23	12	2	0	0	0	154.83	26.95	2	-1	157.86	0	39.03	0	26.95	17	0	3	1	1
2	2	23	13	3	0	0	0	182.24	16.45	4	-1	0	0	42.52	0	17.69	17	0	4	1	0
2	2	23	14	2	0	0	0	208.41	62.88	3	-1	119.03	23.85	39.03	0	62.88	17	1	3	1	1
2	2	23	15	5	0	0	0	240.05	44.19	3	-1	98.86	0	55.52	0	44.19	17	0	1	1	1
2	2	23	16	1	0	0	0	124.75	40	4	-1	0	0	80	0	27.12	17	0	4	1	0
2	2	23	17	5	0	0	0	184.26	58	1	-1	111.52	-0.459999	55.52	0	55.06	17	1	1	1	1
2	2	23	18	1	0	0	0	122.7	1	4	-1	0	0	80	0	95.89	17	0	4	1	0
2	2	23	19	3	0	0	0	219.1	92	4	-1	0	48.41	42.52	0	90.93	17	1	4	1	0
2	2	23	20	4	0	0	0	194.95	2	2	-1	254.01	0	45	0	8.18	17	0	3	1	1
2	2	24	1	1	0	0	0	90.68	95	1	-1	198.72	-3.79	92.55	0	88.76	4	1	1	1	1
2	2	24	2	1	0	0	0	94.08	78	4	-1	0	0	92.55	0	74.77	4	0	1	1	0
2	2	24	3	2	0	0	0	153.06	40	3	-1	149.73	0	40.69	0	38.85	4	0	4	1	1
2	2	24	4	4	0	0	1	187.35	100	2	-1	241.9	-2.99	89.89	0	86.9	4	1	2	1	1
2	2	24	5	2	0	0	0	324.15	73.62	4	-1	0	32.93	40.69	0	73.62	4	1	4	1	0
2	2	24	6	5	0	0	0	165.54	45.01	3	-1	53.26	0	47.67	0	45.01	4	0	3	1	1
2	2	24	7	4	0	0	0	189.04	8	1	-1	19.31	0	89.89	0	8.08	4	0	2	1	1
2	2	24	8	5	0	0	0	349.85	53.3	3	-1	144.08	5.63	47.67	0	53.3	4	1	3	1	1
2	2	24	9	3	0	0	0	213.35	5.67	1	-1	299.9	0	70.53	0	5.67	4	0	4	1	1
2	2	24	10	4	0	0	0	150.28	89.89	3	-1	144	0	89.89	0	84.29	4	0	2	1	1
2	2	24	11	3	0	0	0	153.98	45	1	-1	12	0	70.53	0	55.2	4	0	4	1	1
2	2	24	12	2	0	0	0	154.83	0.15	2	-1	157.86	0	40.69	0	0.15	4	0	4	1	1
2	2	24	13	3	0	0	0	182.24	70.53	4	-1	0	0	70.53	0	88.54	4	0	4	1	0
2	2	24	14	2	0	0	0	208.41	40.69	3	-1	119.03	0	40.69	0	40.69	4	0	4	1	1
2	2	24	15	5	0	0	0	240.05	47.67	3	-1	98.86	0	47.67	0	49.67	4	0	3	1	1
2	2	24	16	1	0	0	0	124.75	65	4	-1	0	0	92.55	0	49.36	4	0	1	1	0
2	2	24	17	5	0	0	0	184.26	36	1	-1	111.52	0	47.67	0	36	4	0	3	1	1
2	2	24	18	1	0	0	0	122.7	92.55	4	-1	0	0	92.55	0	92.55	4	0	1	1	0
2	2	24	19	3	0	0	0	176.24	89	4	-1	0	-42.86	70.53	0	27.67	4	1	4	1	0
2	2	24	20	4	0	0	0	194.95	65	2	-1	254.01	0	89.89	0	46.7	4	0	2	1	1
2	2	25	1	1	0	0	0	90.68	10	1	-1	198.72	0	100	0	8.49	19	0	4	1	1
2	2	25	2	1	0	0	0	94.08	100	4	-1	0	0	100	0	81.23	19	0	4	1	0
2	2	25	3	2	0	0	0	153.06	25	3	-1	149.73	0	42.86	0	18.6	19	0	3	1	1
2	2	25	4	4	0	0	1	187.35	22	2	-1	241.9	0	40.22	0	19.27	19	0	1	1	1
2	2	25	5	2	0	0	0	324.15	3.35	4	-1	0	0	42.86	0	3.35	19	0	3	1	0
2	2	25	6	5	0	0	0	165.54	21.04	3	-1	53.26	0	30.89	0	21.04	19	0	3	1	1
2	2	25	7	4	0	0	0	244	100	1	-1	59.53	54.96	40.22	0	95.18	19	1	1	1	1
2	2	25	8	5	0	0	0	380.72	61.76	3	-1	174.97	30.87	30.89	0	61.76	19	1	3	1	1
2	2	25	9	3	0	0	0	234.52	56.86	1	-1	335.59	21.17	35.69	0	56.86	19	1	1	1	1
2	2	25	10	4	0	0	0	150.28	40.22	3	-1	144	0	40.22	0	37.42	19	0	1	1	1
2	2	25	11	3	0	0	0	153.98	8	1	-1	12	0	35.69	0	7.78	19	0	1	1	1
2	2	25	12	2	0	0	0	154.83	42.86	2	-1	157.86	0	42.86	0	42.86	19	0	3	1	1
2	2	25	13	3	0	0	0	182.24	35.69	4	-1	0	0	35.69	0	42.5	19	0	1	1	0
2	2	25	14	2	0	0	0	213.95	48.4	3	-1	161.89	5.54	42.86	0	48.4	19	1	3	1	1
2	2	25	15	5	0	0	0	240.05	30.89	3	-1	98.86	0	30.89	0	38.72	19	0	3	1	1
2	2	25	16	1	0	0	0	111.71	120	4	-1	0	-13.04	100	0	86.96	19	1	4	1	0
2	2	25	17	5	0	0	0	184.26	30	1	-1	111.52	0	30.89	0	28.66	19	0	3	1	1
2	2	25	18	1	0	0	0	122.7	88.76	4	-1	0	0	100	0	88.76	19	0	4	1	0
2	2	25	19	3	0	0	0	176.24	0	4	-1	0	0	35.69	0	57.9	19	0	1	1	0
2	2	25	20	4	0	0	0	194.95	12	2	-1	254.01	0	40.22	0	10.63	19	0	1	1	1
2	2	26	1	1	0	0	0	90.68	95	1	-1	198.72	0	95	0	89.08	13	0	4	1	1
2	2	26	2	1	0	0	0	54.77	150	4	-1	0	-39.31	95	0	55.69	13	1	4	1	0
2	2	26	3	2	0	0	0	153.06	20	3	-1	149.73	0	57.08	0	3.27	13	0	3	1	1
2	2	26	4	4	0	0	1	187.35	36	2	-1	241.9	0	36	0	33.15	13	0	1	1	1
2	2	26	5	2	0	0	0	324.15	57.08	4	-1	0	0	57.08	0	57.08	13	0	3	1	0
2	2	26	6	5	0	0	0	186.58	61.04	3	-1	93.26	21.04	40	0	61.04	13	1	3	1	1
2	2	26	7	4	0	0	0	259.09	55	1	-1	95.53	15.09	36	0	51.09	13	1	1	1	1
2	2	26	8	5	0	0	0	380.72	32.19	3	-1	174.97	0	40	0	32.19	13	0	3	1	1
2	2	26	9	3	0	0	0	234.52	57.71	1	-1	335.59	0	66.04	0	57.71	13	0	1	1	1
2	2	26	10	4	0	0	0	150.28	23.96	3	-1	144	0	36	0	15.48	13	0	1	1	1
2	2	26	11	3	0	0	0	180.75	92.81	1	-1	78.04	26.77	66.04	0	92.81	13	1	1	1	1
2	2	26	12	2	0	0	0	154.83	20.4	2	-1	157.86	0	57.08	0	20.4	13	0	3	1	1
2	2	26	13	3	0	0	0	182.24	66.04	4	-1	0	0	66.04	0	76.77	13	0	1	1	0
2	2	26	14	2	0	0	0	233.71	76.84	3	-1	218.97	19.76	57.08	0	76.84	13	1	3	1	1
2	2	26	15	5	0	0	0	240.05	5	3	-1	98.86	0	40	0	11.26	13	0	3	1	1
2	2	26	16	1	0	0	0	111.71	65	4	-1	0	0	95	0	55.43	13	0	4	1	0
2	2	26	17	5	0	0	0	184.26	40	1	-1	111.52	0	40	0	38.8	13	0	3	1	1
2	2	26	18	1	0	0	0	122.7	77.59	4	-1	0	0	95	0	77.59	13	0	4	1	0
2	2	26	19	3	0	0	0	176.24	0	4	-1	0	0	66.04	0	11.83	13	0	1	1	0
2	2	26	20	4	0	0	0	194.95	5	2	-1	254.01	0	36	0	2.09	13	0	1	1	1
2	2	27	1	1	0	0	0	90.68	60	1	-1	198.72	0	70	0	50.15	12	0	4	1	1
2	2	27	2	1	0	0	0	74.95	105	4	-1	0	20.18	70	0	90.18	12	1	4	1	0
2	2	27	3	2	0	0	0	153.06	23	3	-1	149.73	0	72.23	0	1.76	12	0	3	1	1
2	2	27	4	4	0	0	1	187.35	50	2	-1	241.9	0	50	0	57.36	12	0	2	1	1
2	2	27	5	2	0	0	0	324.15	34.8	4	-1	0	0	72.23	0	34.8	12	0	3	1	0
2	2	27	6	5	0	0	0	186.58	33.83	3	-1	93.26	0	68	0	33.83	12	0	1	1	1
2	2	27	7	4	0	0	0	259.09	9.63	1	-1	95.53	0	50	0	9.63	12	0	2	1	1
2	2	27	8	5	0	0	0	380.72	68	3	-1	174.97	0	68	0	66.24	12	0	1	1	1
2	2	27	9	3	0	0	0	234.52	36.63	1	-1	335.59	0	59	0	36.63	12	0	4	1	1
2	2	27	10	4	0	0	0	150.28	30.25	3	-1	144	0	50	0	26.28	12	0	2	1	1
2	2	27	11	3	0	0	0	180.75	40.74	1	-1	78.04	0	59	0	40.74	12	0	4	1	1
2	2	27	12	2	0	0	0	154.83	72.23	2	-1	157.86	0	72.23	0	72.23	12	0	3	1	1
2	2	27	13	3	0	0	0	182.24	59	4	-1	0	0	59	0	69.39	12	0	4	1	0
2	2	27	14	2	0	0	0	258.58	97.1	3	-1	291.2	24.87	72.23	0	97.1	12	1	3	1	1
2	2	27	15	5	0	0	0	240.05	33	3	-1	98.86	0	68	0	32.6	12	0	1	1	1
2	2	27	16	1	0	0	0	111.71	70	4	-1	0	0	70	0	58.95	12	0	4	1	0
2	2	27	17	5	0	0	0	193.77	80	1	-1	179.52	9.51	68	0	77.51	12	1	1	1	1
2	2	27	18	1	0	0	0	122.7	17.34	4	-1	0	0	70	0	17.34	12	0	4	1	0
2	2	27	19	3	0	0	0	206.69	89	4	-1	0	30.45	59	0	89.45	12	1	4	1	0
2	2	27	20	4	0	0	0	233.22	100	2	-1	304.01	38.27	50	0	88.27	12	1	2	1	1
2	2	28	1	1	0	0	0	90.68	30	1	-1	198.72	0	30	0	26.26	5	0	4	1	1
2	2	28	2	1	0	0	0	90.54	75	4	-1	0	15.59	30	0	45.59	5	1	4	1	0
2	2	28	3	2	0	0	0	153.06	45	3	-1	149.73	0	66.51	0	45.4	5	0	2	1	1
2	2	28	4	4	0	0	1	187.35	50	2	-1	241.9	0	100	0	28.59	5	0	3	1	1
2	2	28	5	2	0	0	0	324.15	0.58	4	-1	0	0	66.51	0	0.58	5	0	2	1	0
2	2	28	6	5	0	0	0	186.58	42.88	3	-1	93.26	0	70.69	0	42.88	5	0	1	1	1
2	2	28	7	4	0	0	0	259.09	15	1	-1	95.53	0	100	0	14.91	5	0	3	1	1
2	2	28	8	5	0	0	0	380.72	66	3	-1	174.97	0	70.69	0	64.85	5	0	1	1	1
2	2	28	9	3	0	0	0	234.52	21.36	1	-1	335.59	0	69.95	0	21.36	5	0	4	1	1
2	2	28	10	4	0	0	0	147.74	102.99	3	-1	244	-2.54	100	0	97.46	5	1	3	1	1
2	2	28	11	3	0	0	0	180.75	69.95	1	-1	78.04	0	69.95	0	69.95	5	0	4	1	1
2	2	28	12	2	0	0	0	180.04	91.72	2	-1	224.37	25.21	66.51	0	91.72	5	1	2	1	1
2	2	28	13	3	0	0	0	182.24	3	4	-1	0	0	69.95	0	8.95	5	0	4	1	0
2	2	28	14	2	0	0	0	258.58	66.51	3	-1	291.2	0	66.51	0	66.51	5	0	2	1	1
2	2	28	15	5	0	0	0	240.05	70.69	3	-1	98.86	0	70.69	0	71.41	5	0	1	1	1
2	2	28	16	1	0	0	0	111.71	30	4	-1	0	0	30	0	23.88	5	0	4	1	0
2	2	28	17	5	0	0	0	217.56	95	1	-1	250.21	23.79	70.69	0	94.48	5	1	1	1	1
2	2	28	18	1	0	0	0	122.7	20.25	4	-1	0	0	30	0	20.25	5	0	4	1	0
2	2	28	19	3	0	0	0	216.41	80.12	4	-1	0	9.72	69.95	0	79.67	5	1	4	1	0
2	2	28	20	4	0	0	0	233.22	100	2	-1	304.01	0	100	0	87.12	5	0	3	1	1
2	2	29	1	1	0	0	0	90.68	13	1	-1	198.72	0	13	0	11.5	20	0	4	1	1
2	2	29	2	1	0	0	0	90.54	3.97	4	-1	0	0	13	0	2.96	20	0	4	1	0
2	2	29	3	2	0	0	0	170.32	94	3	-1	226.58	17.26	76.85	0	94.11	20	1	3	1	1
2	2	29	4	4	0	0	1	208.87	95	2	-1	301.9	21.52	60	0	81.52	20	1	2	1	1
2	2	29	5	2	0	0	0	324.15	33.91	4	-1	0	0	76.85	0	33.91	20	0	3	1	0
2	2	29	6	5	0	0	0	186.58	1.63	3	-1	93.26	0	89.6	0	1.63	20	0	3	1	1
2	2	29	7	4	0	0	0	259.09	60	1	-1	95.53	0	60	0	54.38	20	0	2	1	1
2	2	29	8	5	0	0	0	386.29	95.17	3	-1	264.57	5.57	89.6	0	95.17	20	1	3	1	1
2	2	29	9	3	0	0	0	253.06	94.54	1	-1	411.59	18.54	76	0	94.54	20	1	1	1	1
2	2	29	10	4	0	0	0	147.74	40.01	3	-1	244	0	60	0	35.98	20	0	2	1	1
2	2	29	11	3	0	0	0	180.75	15	1	-1	78.04	0	76	0	14.3	20	0	1	1	1
2	2	29	12	2	0	0	0	180.04	76.85	2	-1	224.37	0	76.85	0	76.85	20	0	3	1	1
2	2	29	13	3	0	0	0	182.24	76	4	-1	0	0	76	0	91.84	20	0	1	1	0
2	2	29	14	2	0	0	0	258.58	24.28	3	-1	291.2	0	76.85	0	24.28	20	0	3	1	1
2	2	29	15	5	0	0	0	240.05	89.6	3	-1	98.86	0	89.6	0	91.6	20	0	3	1	1
2	2	29	16	1	0	0	0	131.63	40	4	-1	0	19.92	13	0	32.92	20	1	4	1	0
2	2	29	17	5	0	0	0	217.56	30	1	-1	250.21	0	89.6	0	28.36	20	0	3	1	1
2	2	29	18	1	0	0	0	122.7	2.26	4	-1	0	0	13	0	2.26	20	0	4	1	0
2	2	29	19	3	0	0	0	216.41	0	4	-1	0	0	76	0	24.39	20	0	1	1	0
2	2	29	20	4	0	0	0	233.22	50	2	-1	304.01	0	60	0	17.29	20	0	2	1	1
2	2	30	1	1	4.6	4.6	0	90.68	27	1	-1	198.72	0	27	0	23.3	2	0	4	1	1
2	2	30	2	1	7.4	7.4	0	147.74	127	4	-1	0	57.2	27	0	84.2	2	1	4	1	0
2	2	30	3	2	8	8	0	159.1	30	3	-1	255.49	-11.22	28.91	0	17.69	2	1	3	1	1
2	2	30	4	4	10.5	10.5	1	208.87	5	2	-1	301.9	0	22.59	0	2.89	2	0	3	1	1
2	2	30	5	2	16.3	16.3	0	324.15	17.08	4	-1	0	0	28.91	0	17.08	2	0	3	1	0
2	2	30	6	5	10.6	10.6	0	211.9	96.59	3	-1	165.53	25.32	72.27	0	97.59	2	1	3	1	1
2	2	30	7	4	13	13	0	259.09	22.59	1	-1	95.53	0	22.59	0	22.59	2	0	3	1	1
2	2	30	8	5	19.4	19.4	0	386.29	22	3	-1	264.57	0	72.27	0	22.08	2	0	3	1	1
2	2	30	9	3	12.7	12.7	0	253.06	58.48	1	-1	411.59	0	58.48	0	58.48	2	0	1	1	1
2	2	30	10	4	9	9	0	179.6	62.99	3	-1	266.59	31.86	22.59	0	54.45	2	1	3	1	1
2	2	30	11	3	10.4	10.4	0	207.71	85.44	1	-1	136.52	26.96	58.48	0	85.44	2	1	1	1	1
2	2	30	12	2	9.1	9.1	0	180.04	28.91	2	-1	224.37	0	28.91	0	28.91	2	0	3	1	1
2	2	30	13	3	9.2	9.2	0	182.24	55	4	-1	0	0	58.48	0	69.42	2	0	1	1	0
2	2	30	14	2	13	13	0	258.58	15.36	3	-1	291.2	0	28.91	0	15.36	2	0	3	1	1
2	2	30	15	5	12.1	12.1	0	240.05	72.27	3	-1	98.86	0	72.27	0	72.27	2	0	3	1	1
2	2	30	16	1	6.6	6.6	0	131.63	10	4	-1	0	0	27	0	9.32	2	0	4	1	0
2	2	30	17	5	10.9	10.9	0	217.56	35	1	-1	250.21	0	72.27	0	28.63	2	0	3	1	1
2	2	30	18	1	6.2	6.2	0	122.7	25.81	4	-1	0	0	27	0	25.81	2	0	4	1	0
2	2	30	19	3	10.9	10.9	0	216.41	0	4	-1	0	0	58.48	0	48.4	2	0	1	1	0
2	2	30	20	4	11.7	11.7	0	233.22	8	2	-1	304.01	0	22.59	0	5.29	2	0	3	1	1

## Sheet: Session3_FP_SpecialPool
SessionID	AucType	Period	Subject	Group	Profit	TotalProfit	bankrpt	balance	bid	charity	draw	donation	earned	price	tie	value	vlink	win	CharityDummy
3	1	1	1	5	0	0	0	127.19	43.5	5	-1	0	27.19	43.5	0	70.69	1	1	0
3	1	1	2	2	0	0	0	100	6	5	-1	0	0	53	0	7.08	1	0	0			73.3199
3	1	1	3	1	0	0	0	100	2.5	5	-1	0	0	75	0	7.5	1	0	0			76.2001
3	1	1	4	5	0	0	0	100	8	5	-1	0	0	43.5	0	11.25	1	0	0
3	1	1	5	2	0	0	0	146.38	53	5	-1	0	46.38	53	0	99.38	1	1	0
3	1	1	6	4	0	0	0	100	25	5	-1	0	0	45	0	27.29	1	0	0
3	1	1	7	1	0	0	0	100	15.35	5	-1	0	0	75	0	27.8	1	0	0
3	1	1	8	1	0	0	0	114.83	75	5	-1	0	14.83	75	0	89.83	1	1	0
3	1	1	9	4	0	0	0	100	30.99	5	-1	0	0	45	0	42.52	1	0	0
3	1	1	10	3	0	0	0	100	19	5	-1	0	0	45	0	19.31	1	0	0
3	1	1	11	3	0	0	0	100	15	5	-1	0	0	45	0	24.94	1	0	0
3	1	1	12	5	0	0	0	100	20	5	-1	0	0	43.5	0	31.28	1	0	0
3	1	1	13	4	0	0	0	108.66	45	5	-1	0	8.66	45	0	53.66	1	1	0
3	1	1	14	3	0	0	0	128.08	45	5	-1	0	28.08	45	0	73.08	1	1	0
3	1	1	15	2	0	0	0	100	14.5	5	-1	0	0	53	0	15.46	1	0	0
3	1	1	16	1	0	0	0	100	55.01	5	-1	0	0	75	0	64.17	1	0	0
3	1	1	17	3	0	0	0	100	25	5	-1	0	0	45	0	27.01	1	0	0
3	1	1	18	2	0	0	0	100	15	5	-1	0	0	53	0	20.54	1	0	0
3	1	1	19	4	0	0	0	100	25.11	5	-1	0	0	45	0	31.42	1	0	0
3	1	1	20	5	0	0	0	100	12	5	-1	0	0	43.5	0	16	1	0	0
3	1	2	1	5	0	0	0	127.19	20	5	-1	0	0	25	0	23.3	2	0	0
3	1	2	2	2	0	0	0	109.2	75	5	-1	0	9.2	75	0	84.2	2	1	0
3	1	2	3	1	0	0	0	100	10	5	-1	0	0	20	0	17.69	2	0	0
3	1	2	4	5	0	0	0	100	2	5	-1	0	0	25	0	2.89	2	0	0
3	1	2	5	2	0	0	0	146.38	15	5	-1	0	0	75	0	17.08	2	0	0
3	1	2	6	4	0	0	0	101.01	96.58	5	-1	0	1.00999	96.58	0	97.59	2	1	0
3	1	2	7	1	0	0	0	100	15.37	5	-1	0	0	20	0	22.59	2	0	0
3	1	2	8	1	0	0	0	116.91	20	5	-1	0	2.08	20	0	22.08	2	1	0
3	1	2	9	4	0	0	0	100	56.99	5	-1	0	0	96.58	0	58.48	2	0	0
3	1	2	10	3	0	0	0	100	50	5	-1	0	0	80	0	54.45	2	0	0
3	1	2	11	3	0	0	0	105.44	80	5	-1	0	5.44	80	0	85.44	2	1	0
3	1	2	12	5	0	0	0	103.91	25	5	-1	0	3.91	25	0	28.91	2	1	0
3	1	2	13	4	0	0	0	108.66	50	5	-1	0	0	96.58	0	69.42	2	0	0
3	1	2	14	3	0	0	0	128.08	10	5	-1	0	0	80	0	15.36	2	0	0
3	1	2	15	2	0	0	0	100	70.5	5	-1	0	0	75	0	72.27	2	0	0
3	1	2	16	1	0	0	0	100	9	5	-1	0	0	20	0	9.32	2	0	0
3	1	2	17	3	0	0	0	100	25	5	-1	0	0	80	0	28.63	2	0	0
3	1	2	18	2	0	0	0	100	23	5	-1	0	0	75	0	25.81	2	0	0
3	1	2	19	4	0	0	0	100	45	5	-1	0	0	96.58	0	48.4	2	0	0
3	1	2	20	5	0	0	0	100	4	5	-1	0	0	25	0	5.29	2	0	0
3	1	3	1	5	0	0	0	127.19	15	5	-1	0	0	50	0	18.87	3	0	0
3	1	3	2	2	0	0	0	109.2	40	5	-1	0	0	48.5	0	61.44	3	0	0
3	1	3	3	1	0	0	0	100	45	5	-1	0	0	79.05	0	91.18	3	0	0
3	1	3	4	5	0	0	0	100	38	5	-1	0	0	50	0	45.22	3	0	0
3	1	3	5	2	0	0	0	169.96	48.5	5	-1	0	23.58	48.5	0	72.08	3	1	0
3	1	3	6	4	0	0	0	101.01	56.37	5	-1	0	0	89.58	0	57.38	3	0	0
3	1	3	7	1	0	0	0	117	79.05	5	-1	0	17	79.05	0	96.05	3	1	0
3	1	3	8	1	0	0	0	116.91	32	5	-1	0	0	79.05	0	40.3	3	0	0
3	1	3	9	4	0	0	0	105.15	89.58	5	-1	0	5.15	89.58	0	94.73	3	1	0
3	1	3	10	3	0	0	0	100	61.7	5	-1	0	0	100	0	67.61	3	0	0
3	1	3	11	3	0	0	0	105.44	94.5	5	-1	0	0	100	0	96.99	3	0	0
3	1	3	12	5	0	0	0	135.32	50	5	-1	0	31.41	50	0	81.41	3	1	0
3	1	3	13	4	0	0	0	108.66	75.02	5	-1	0	0	89.58	0	88.38	3	0	0
3	1	3	14	3	0	0	0	128.08	58	5	-1	0	0	100	0	83.77	3	0	0
3	1	3	15	2	0	0	0	100	29	5	-1	0	0	48.5	0	29.16	3	0	0
3	1	3	16	1	0	0	0	100	35.01	5	-1	0	0	79.05	0	40.5	3	0	0
3	1	3	17	3	0	0	0	86.12	100	5	-1	0	-13.88	100	0	86.12	3	1	0
3	1	3	18	2	0	0	0	100	45	5	-1	0	0	48.5	0	51.7	3	0	0
3	1	3	19	4	0	0	0	100	50	5	-1	0	0	89.58	0	61.54	3	0	0
3	1	3	20	5	0	0	0	100	30	5	-1	0	0	50	0	36.08	3	0	0
3	1	4	1	5	0	0	0	127.19	55	5	-1	0	0	70	0	88.76	4	0	0
3	1	4	2	2	0	0	0	109.2	41	5	-1	0	0	70.51	0	74.77	4	0	0
3	1	4	3	1	0	0	0	100	38.85	5	-1	0	0	45.1	0	38.85	4	0	0
3	1	4	4	5	0	0	0	116.9	70	5	-1	0	16.9	70	0	86.9	4	1	0
3	1	4	5	2	0	0	0	169.96	43	5	-1	0	0	70.51	0	73.62	4	0	0
3	1	4	6	4	0	0	0	101.01	44.59	5	-1	0	0	80.54	0	45.01	4	0	0
3	1	4	7	1	0	0	0	117	6.08	5	-1	0	0	45.1	0	8.08	4	0	0
3	1	4	8	1	0	0	0	125.11	45.1	5	-1	0	8.2	45.1	0	53.3	4	1	0
3	1	4	9	4	0	0	0	105.15	5.5	5	-1	0	0	80.54	0	5.67	4	0	0
3	1	4	10	3	0	0	0	104	80.29	5	-1	0	4	80.29	0	84.29	4	1	0
3	1	4	11	3	0	0	0	105.44	51	5	-1	0	0	80.29	0	55.2	4	0	0
3	1	4	12	5	0	0	0	135.32	10	5	-1	0	0	70	0	0.15	4	0	0
3	1	4	13	4	0	0	0	116.66	80.54	5	-1	0	8	80.54	0	88.54	4	1	0
3	1	4	14	3	0	0	0	128.08	35	5	-1	0	0	80.29	0	40.69	4	0	0
3	1	4	15	2	0	0	0	100	55	5	-1	0	0	70.51	0	49.67	4	0	0
3	1	4	16	1	0	0	0	100	40.05	5	-1	0	0	45.1	0	49.36	4	0	0
3	1	4	17	3	0	0	0	86.12	36	5	-1	0	0	80.29	0	36	4	0	0
3	1	4	18	2	0	0	0	122.04	70.51	5	-1	0	22.04	70.51	0	92.55	4	1	0
3	1	4	19	4	0	0	0	100	26.67	5	-1	0	0	80.54	0	27.67	4	0	0
3	1	4	20	5	0	0	0	100	40	5	-1	0	0	70	0	46.7	4	0	0
3	1	5	1	5	0	0	0	127.19	24.26	5	-1	0	0	83	0	26.26	5	0	0
3	1	5	2	2	0	0	0	109.2	40	5	-1	0	0	75	0	45.59	5	0	0
3	1	5	3	1	0	0	0	100	45.4	5	-1	0	0	58.4	0	45.4	5	0	0
3	1	5	4	5	0	0	0	116.9	25	5	-1	0	0	83	0	28.59	5	0	0
3	1	5	5	2	0	0	0	169.96	0.5	5	-1	0	0	75	0	0.58	5	0	0
3	1	5	6	4	0	0	0	101.01	40.85	5	-1	0	0	60	0	42.88	5	0	0
3	1	5	7	1	0	0	0	117	12.67	5	-1	0	0	58.4	0	14.91	5	0	0
3	1	5	8	1	0	0	0	131.56	58.4	5	-1	0	6.45	58.4	0	64.85	5	1	0
3	1	5	9	4	0	0	0	105.15	20.5	5	-1	0	0	60	0	21.36	5	0	0
3	1	5	10	3	0	0	0	104	90.46	5	-1	0	0	99	0	97.46	5	0	0
3	1	5	11	3	0	0	0	105.44	67	5	-1	0	0	99	0	69.95	5	0	0
3	1	5	12	5	0	0	0	135.32	65	5	-1	0	0	83	0	91.72	5	0	0
3	1	5	13	4	0	0	0	116.66	7	5	-1	0	0	60	0	8.95	5	0	0
3	1	5	14	3	0	0	0	128.08	50	5	-1	0	0	99	0	66.51	5	0	0
3	1	5	15	2	0	0	0	96.41	75	5	-1	0	-3.59	75	0	71.41	5	1	0
3	1	5	16	1	0	0	0	100	20.58	5	-1	0	0	58.4	0	23.88	5	0	0
3	1	5	17	3	0	0	0	81.6	99	5	-1	0	-4.52	99	0	94.48	5	1	0
3	1	5	18	2	0	0	0	122.04	20.25	5	-1	0	0	75	0	20.25	5	0	0
3	1	5	19	4	0	0	0	119.67	60	5	-1	0	19.67	60	0	79.67	5	1	0
3	1	5	20	5	0	0	0	104.12	83	5	-1	0	4.12	83	0	87.12	5	1	0
3	1	6	1	5	0	0	0	127.19	47.03	5	-1	0	0	75	0	47.03	15	0	1
3	1	6	2	2	0	0	0	110.26	70	5	-1	70	1.06	70	0	71.06	15	1	1
3	1	6	3	1	0	0	0	103.28	75	5	-1	75	3.28	75	0	78.28	15	1	1
3	1	6	4	5	0	0	0	116.9	60.35	5	-1	0	0	75	0	60.35	15	0	1
3	1	6	5	2	0	0	0	169.96	50	5	-1	0	0	70	0	61.57	15	0	1
3	1	6	6	4	0	0	0	101.01	2.36	5	-1	0	0	80	0	2.36	15	0	1
3	1	6	7	1	0	0	0	117	60.5	5	-1	0	0	75	0	60.5	15	0	1
3	1	6	8	1	0	0	0	131.56	60.21	5	-1	0	0	75	0	70.32	15	0	1
3	1	6	9	4	0	0	0	105.15	75.5	5	-1	0	0	80	0	80.99	15	0	1
3	1	6	10	3	0	0	0	104	1	5	-1	0	0	90	0	28.57	15	0	1
3	1	6	11	3	0	0	0	106.02	90	5	-1	90	0.580002	90	0	90.58	15	1	1
3	1	6	12	5	0	0	0	144.09	75	5	-1	75	8.77	75	0	83.77	15	1	1
3	1	6	13	4	0	0	0	128.4	80	5	-1	80	11.74	80	0	91.74	15	1	1
3	1	6	14	3	0	0	0	128.08	1.5	5	-1	0	0	90	0	1.98	15	0	1
3	1	6	15	2	0	0	0	96.41	25	5	-1	0	0	70	0	22.52	15	0	1
3	1	6	16	1	0	0	0	100	36.02	5	-1	0	0	75	0	43.61	15	0	1
3	1	6	17	3	0	0	0	81.6	40	5	-1	0	0	90	0	34.41	15	0	1
3	1	6	18	2	0	0	0	122.04	60	5	-1	0	0	70	0	64.02	15	0	1
3	1	6	19	4	0	0	0	119.67	45	5	-1	0	0	80	0	51.33	15	0	1
3	1	6	20	5	0	0	0	104.12	70	5	-1	0	0	75	0	78	15	0	1
3	1	7	1	5	0	0	0	127.19	22.78	5	-1	0	0	87	0	22.78	16	0	1
3	1	7	2	2	0	0	0	110.26	20.38	5	-1	70	0	80.76	0	25.38	16	0	1
3	1	7	3	1	0	0	0	103.28	40	5	-1	75	0	81.23	0	44.99	16	0	1
3	1	7	4	5	0	0	0	116.9	17.35	5	-1	0	0	87	0	17.35	16	0	1
3	1	7	5	2	0	0	0	184.96	80.76	5	-1	80.76	15	80.76	0	95.76	16	1	1
3	1	7	6	4	0	0	0	101.01	62.06	5	-1	62.06	0	62.06	0	62.06	16	1	1
3	1	7	7	1	0	0	0	117	81.23	5	-1	81.23	0	81.23	0	81.23	16	1	1
3	1	7	8	1	0	0	0	131.56	38.11	5	-1	0	0	81.23	0	43.25	16	0	1
3	1	7	9	4	0	0	0	105.15	51.5	5	-1	0	0	62.06	0	54.25	16	0	1
3	1	7	10	3	0	0	0	104	50	5	-1	0	0	60	0	40.92	16	0	1
3	1	7	11	3	0	0	0	106.02	24	5	-1	90	0	60	0	25.47	16	0	1
3	1	7	12	5	0	0	0	144.09	25	5	-1	75	0	87	0	35.24	16	0	1
3	1	7	13	4	0	0	0	128.4	60.02	5	-1	80	0	62.06	0	69.95	16	0	1
3	1	7	14	3	0	0	0	128.08	20	5	-1	0	0	60	0	23.85	16	0	1
3	1	7	15	2	0	0	0	96.41	60	5	-1	0	0	80.76	0	49.15	16	0	1
3	1	7	16	1	0	0	0	100	35.07	5	-1	0	0	81.23	0	38.08	16	0	1
3	1	7	17	3	0	0	0	67.96	60	5	-1	60	-13.64	60	0	46.36	16	1	1
3	1	7	18	2	0	0	0	122.04	41.44	5	-1	0	0	80.76	0	41.44	16	0	1
3	1	7	19	4	0	0	0	119.67	50	5	-1	0	0	62.06	0	53.37	16	0	1
3	1	7	20	5	0	0	0	114.68	87	5	-1	87	10.56	87	0	97.56	16	1	1
3	1	8	1	5	0	0	0	127.19	18.87	5	-1	0	0	80	0	18.87	3	0	1
3	1	8	2	2	0	0	0	110.26	60	5	-1	70	0	65	0	61.44	3	0	1
3	1	8	3	1	0	0	0	103.28	90	5	-1	75	0	96.05	0	91.18	3	0	1
3	1	8	4	5	0	0	0	116.9	45.22	5	-1	0	0	80	0	45.22	3	0	1
3	1	8	5	2	0	0	0	192.04	65	5	-1	145.76	7.08	65	0	72.08	3	1	1
3	1	8	6	4	0	0	0	101.01	57.38	5	-1	62.06	0	94.5	0	57.38	3	0	1
3	1	8	7	1	0	0	0	117	96.05	5	-1	177.28	0	96.05	0	96.05	3	1	1
3	1	8	8	1	0	0	0	131.56	35.08	5	-1	0	0	96.05	0	40.3	3	0	1
3	1	8	9	4	0	0	0	105.38	94.5	5	-1	94.5	0.230003	94.5	0	94.73	3	1	1
3	1	8	10	3	0	0	0	104	67	5	-1	0	0	100	0	67.61	3	0	1
3	1	8	11	3	0	0	0	106.02	95.5	5	-1	90	0	100	0	96.99	3	0	1
3	1	8	12	5	0	0	0	145.5	80	5	-1	155	1.41	80	0	81.41	3	1	1
3	1	8	13	4	0	0	0	128.4	75.38	5	-1	80	0	94.5	0	88.38	3	0	1
3	1	8	14	3	0	0	0	128.08	70	5	-1	0	0	100	0	83.77	3	0	1
3	1	8	15	2	0	0	0	96.41	42.16	5	-1	0	0	65	0	29.16	3	0	1
3	1	8	16	1	0	0	0	100	35.08	5	-1	0	0	96.05	0	40.5	3	0	1
3	1	8	17	3	0	0	0	54.08	100	5	-1	160	-13.88	100	0	86.12	3	1	1
3	1	8	18	2	0	0	0	122.04	51.7	5	-1	0	0	65	0	51.7	3	0	1
3	1	8	19	4	0	0	0	119.67	58	5	-1	0	0	94.5	0	61.54	3	0	1
3	1	8	20	5	0	0	0	114.68	34	5	-1	87	0	80	0	36.08	3	0	1
3	1	9	1	5	0	0	0	127.19	12.66	5	-1	0	0	85	0	12.66	14	0	1
3	1	9	2	2	0	0	0	110.26	75	5	-1	70	0	90.01	0	79.7	14	0	1
3	1	9	3	1	0	0	0	103.28	45.9	5	-1	75	0	62.34	0	45.9	14	0	1
3	1	9	4	5	0	0	0	116.9	23.81	5	-1	0	0	85	0	23.81	14	0	1
3	1	9	5	2	0	0	0	192.04	60	5	-1	145.76	0	90.01	0	82.86	14	0	1
3	1	9	6	4	0	0	0	101.01	18.4	5	-1	62.06	0	92.5	0	18.4	14	0	1
3	1	9	7	1	0	0	0	117	30	5	-1	177.28	0	62.34	0	32.15	14	0	1
3	1	9	8	1	0	0	0	131.56	35.08	5	-1	0	0	62.34	0	37.63	14	0	1
3	1	9	9	4	0	0	0	106.49	92.5	5	-1	187	1.11	92.5	0	93.61	14	1	1
3	1	9	10	3	0	0	0	104.36	99	5	-1	99	0.360001	99	0	99.36	14	1	1
3	1	9	11	3	0	0	0	106.02	84	5	-1	90	0	99	0	87.18	14	0	1
3	1	9	12	5	0	0	0	145.5	75	5	-1	155	0	85	0	88.19	14	0	1
3	1	9	13	4	0	0	0	128.4	25	5	-1	80	0	92.5	0	31.22	14	0	1
3	1	9	14	3	0	0	0	128.08	8	5	-1	0	0	99	0	8.16	14	0	1
3	1	9	15	2	0	0	0	96.41	44.17	5	-1	0	0	90.01	0	29.17	14	0	1
3	1	9	16	1	0	0	0	116.7	62.34	5	-1	62.34	16.7	62.34	0	79.04	14	1	1
3	1	9	17	3	0	0	0	54.08	25	5	-1	160	0	99	0	5.28	14	0	1
3	1	9	18	2	0	0	0	128.31	90.01	5	-1	90.01	6.27	90.01	0	96.28	14	1	1
3	1	9	19	4	0	0	0	119.67	32	5	-1	0	0	92.5	0	33.83	14	0	1
3	1	9	20	5	0	0	0	121.93	85	5	-1	172	7.25	85	0	92.25	14	1	1
3	1	10	1	5	0	0	0	127.88	70	5	-1	70	0.690002	70	0	70.69	1	1	1
3	1	10	2	2	0	0	0	110.26	6	5	-1	70	0	89	0	7.08	1	0	1
3	1	10	3	1	0	0	0	103.28	7.5	5	-1	75	0	80	0	7.5	1	0	1
3	1	10	4	5	0	0	0	116.9	50	5	-1	0	0	70	0	11.25	1	0	1
3	1	10	5	2	0	0	0	202.42	89	5	-1	234.76	10.38	89	0	99.38	1	1	1
3	1	10	6	4	0	0	0	101.01	27.29	5	-1	62.06	0	45.66	0	27.29	1	0	1
3	1	10	7	1	0	0	0	117	27.8	5	-1	177.28	0	80	0	27.8	1	0	1
3	1	10	8	1	0	0	0	141.39	80	5	-1	80	9.83	80	0	89.83	1	1	1
3	1	10	9	4	0	0	0	106.49	35.5	5	-1	187	0	45.66	0	42.52	1	0	1
3	1	10	10	3	0	0	0	104.36	19	5	-1	99	0	68	0	19.31	1	0	1
3	1	10	11	3	0	0	0	106.02	23.75	5	-1	90	0	68	0	24.94	1	0	1
3	1	10	12	5	0	0	0	145.5	45	5	-1	155	0	70	0	31.28	1	0	1
3	1	10	13	4	0	0	0	136.4	45.66	5	-1	125.66	8	45.66	0	53.66	1	1	1
3	1	10	14	3	0	0	0	133.16	68	5	-1	68	5.08	68	0	73.08	1	1	1
3	1	10	15	2	0	0	0	96.41	31.01	5	-1	0	0	89	0	15.46	1	0	1
3	1	10	16	1	0	0	0	116.7	58.31	5	-1	62.34	0	80	0	64.17	1	0	1
3	1	10	17	3	0	0	0	54.08	50	5	-1	160	0	68	0	27.01	1	0	1
3	1	10	18	2	0	0	0	128.31	20.54	5	-1	90.01	0	89	0	20.54	1	0	1
3	1	10	19	4	0	0	0	119.67	30	5	-1	0	0	45.66	0	31.42	1	0	1
3	1	10	20	5	0	0	0	121.93	15	5	-1	172	0	70	0	16	1	0	1
3	1	11	1	5	0	0	0	127.88	35.13	5	-1	70	0	68	0	39.13	11	0	0
3	1	11	2	2	0	0	0	110.26	24.02	5	-1	70	0	90.57	0	25.84	11	0	0
3	1	11	3	1	0	0	0	103.82	80	5	-1	75	0.540001	80	0	80.54	11	1	0
3	1	11	4	5	0	0	0	134.31	68	5	-1	0	17.41	68	0	85.41	11	1	0
3	1	11	5	2	0	0	0	202.42	3	5	-1	234.76	0	90.57	0	4.07	11	0	0
3	1	11	6	4	0	0	0	101.01	20	5	-1	62.06	0	50	0	24.39	11	0	0
3	1	11	7	1	0	0	0	117	39.29	5	-1	177.28	0	80	0	45.29	11	0	0
3	1	11	8	1	0	0	0	141.39	15.04	5	-1	80	0	80	0	20.41	11	0	0
3	1	11	9	4	0	0	0	106.49	9.01	5	-1	187	0	50	0	9.21	11	0	0
3	1	11	10	3	0	0	0	104.36	8	5	-1	99	0	50	0	8.21	11	0	0
3	1	11	11	3	0	0	0	106.02	33	5	-1	90	0	50	0	36.21	11	0	0
3	1	11	12	5	0	0	0	145.5	60	5	-1	155	0	68	0	66.73	11	0	0
3	1	11	13	4	0	0	0	136.4	10	5	-1	125.66	0	50	0	13.51	11	0	0
3	1	11	14	3	0	0	0	141.2	50	5	-1	68	8.04	50	0	58.04	11	1	0
3	1	11	15	2	0	0	0	85.41	90.57	5	-1	0	-11	90.57	0	79.57	11	1	0
3	1	11	16	1	0	0	0	116.7	18.85	5	-1	62.34	0	80	0	21.85	11	0	0
3	1	11	17	3	0	0	0	54.08	26.75	5	-1	160	0	50	0	2.34	11	0	0
3	1	11	18	2	0	0	0	128.31	15.93	5	-1	90.01	0	90.57	0	15.93	11	0	0
3	1	11	19	4	0	0	0	126.3	50	5	-1	0	6.63	50	0	56.63	11	1	0
3	1	11	20	5	0	0	0	121.93	12	5	-1	172	0	68	0	15.07	11	0	0
3	1	12	1	5	0	0	0	127.88	45	5	-1	70	0	83	0	50.15	12	0	0
3	1	12	2	2	0	0	0	112.42	88.02	5	-1	70	2.16	88.02	0	90.18	12	1	0
3	1	12	3	1	0	0	0	103.82	1.76	5	-1	75	0	58.6	0	1.76	12	0	0
3	1	12	4	5	0	0	0	134.31	50	5	-1	0	0	83	0	57.36	12	0	0
3	1	12	5	2	0	0	0	202.42	30	5	-1	234.76	0	88.02	0	34.8	12	0	0
3	1	12	6	4	0	0	0	101.01	32.8	5	-1	62.06	0	70	0	33.83	12	0	0
3	1	12	7	1	0	0	0	117	5	5	-1	177.28	0	58.6	0	9.63	12	0	0
3	1	12	8	1	0	0	0	149.03	58.6	5	-1	80	7.64	58.6	0	66.24	12	1	0
3	1	12	9	4	0	0	0	106.49	34.6	5	-1	187	0	70	0	36.63	12	0	0
3	1	12	10	3	0	0	0	104.36	21.3	5	-1	99	0	86	0	26.28	12	0	0
3	1	12	11	3	0	0	0	106.02	40	5	-1	90	0	86	0	40.74	12	0	0
3	1	12	12	5	0	0	0	145.5	68	5	-1	155	0	83	0	72.23	12	0	0
3	1	12	13	4	0	0	0	136.4	59.39	5	-1	125.66	0	70	0	69.39	12	0	0
3	1	12	14	3	0	0	0	141.2	85	5	-1	68	0	86	0	97.1	12	0	0
3	1	12	15	2	0	0	0	85.41	32	5	-1	0	0	88.02	0	32.6	12	0	0
3	1	12	16	1	0	0	0	116.7	48.53	5	-1	62.34	0	58.6	0	58.95	12	0	0
3	1	12	17	3	0	0	0	45.59	86	5	-1	160	-8.49	86	0	77.51	12	1	0
3	1	12	18	2	0	0	0	128.31	17	5	-1	90.01	0	88.02	0	17.34	12	0	0
3	1	12	19	4	0	0	0	145.75	70	5	-1	0	19.45	70	0	89.45	12	1	0
3	1	12	20	5	0	0	0	127.2	83	5	-1	172	5.27	83	0	88.27	12	1	0
3	1	13	1	5	0	0	0	141.96	75	5	-1	70	14.08	75	0	89.08	13	1	0
3	1	13	2	2	0	0	0	112.42	50	5	-1	70	0	65	0	55.69	13	0	0
3	1	13	3	1	0	0	0	103.82	3.27	5	-1	75	0	48.36	0	3.27	13	0	0
3	1	13	4	5	0	0	0	134.31	32	5	-1	0	0	75	0	33.15	13	0	0
3	1	13	5	2	0	0	0	202.42	49	5	-1	234.76	0	65	0	57.08	13	0	0
3	1	13	6	4	0	0	0	101.01	55.75	5	-1	62.06	0	70.02	0	61.04	13	0	0
3	1	13	7	1	0	0	0	117	45.09	5	-1	177.28	0	48.36	0	51.09	13	0	0
3	1	13	8	1	0	0	0	149.03	30.08	5	-1	80	0	48.36	0	32.19	13	0	0
3	1	13	9	4	0	0	0	106.49	55	5	-1	187	0	70.02	0	57.71	13	0	0
3	1	13	10	3	0	0	0	104.36	12	5	-1	99	0	92	0	15.48	13	0	0
3	1	13	11	3	0	0	0	106.83	92	5	-1	90	0.809998	92	0	92.81	13	1	0
3	1	13	12	5	0	0	0	145.5	20	5	-1	155	0	75	0	20.4	13	0	0
3	1	13	13	4	0	0	0	143.15	70.02	5	-1	125.66	6.75	70.02	0	76.77	13	1	0
3	1	13	14	3	0	0	0	141.2	66	5	-1	68	0	92	0	76.84	13	0	0
3	1	13	15	2	0	0	0	85.41	22.52	5	-1	0	0	65	0	11.26	13	0	0
3	1	13	16	1	0	0	0	123.77	48.36	5	-1	62.34	7.07	48.36	0	55.43	13	1	0
3	1	13	17	3	0	0	0	45.59	56	5	-1	160	0	92	0	38.8	13	0	0
3	1	13	18	2	0	0	0	140.9	65	5	-1	90.01	12.59	65	0	77.59	13	1	0
3	1	13	19	4	0	0	0	145.75	11.82	5	-1	0	0	70.02	0	11.83	13	0	0
3	1	13	20	5	0	0	0	127.2	1	5	-1	172	0	75	0	2.09	13	0	0
3	1	14	1	5	0	0	0	141.96	12	5	-1	70	0	83	0	12.66	14	0	0
3	1	14	2	2	0	0	0	116.12	76	5	-1	70	3.7	76	0	79.7	14	1	0
3	1	14	3	1	0	0	0	103.82	45.9	5	-1	75	0	61.02	0	45.9	14	0	0
3	1	14	4	5	0	0	0	134.31	20	5	-1	0	0	83	0	23.81	14	0	0
3	1	14	5	2	0	0	0	202.42	70	5	-1	234.76	0	76	0	82.86	14	0	0
3	1	14	6	4	0	0	0	101.01	15	5	-1	62.06	0	81.5	0	18.4	14	0	0
3	1	14	7	1	0	0	0	117	30.15	5	-1	177.28	0	61.02	0	32.15	14	0	0
3	1	14	8	1	0	0	0	149.03	32.5	5	-1	80	0	61.02	0	37.63	14	0	0
3	1	14	9	4	0	0	0	118.6	81.5	5	-1	187	12.11	81.5	0	93.61	14	1	0
3	1	14	10	3	0	0	0	107.72	96	5	-1	99	3.36	96	0	99.36	14	1	0
3	1	14	11	3	0	0	0	106.83	86.85	5	-1	90	0	96	0	87.18	14	0	0
3	1	14	12	5	0	0	0	145.5	75	5	-1	155	0	83	0	88.19	14	0	0
3	1	14	13	4	0	0	0	143.15	24	5	-1	125.66	0	81.5	0	31.22	14	0	0
3	1	14	14	3	0	0	0	141.2	8	5	-1	68	0	96	0	8.16	14	0	0
3	1	14	15	2	0	0	0	85.41	32	5	-1	0	0	76	0	29.17	14	0	0
3	1	14	16	1	0	0	0	141.79	61.02	5	-1	62.34	18.02	61.02	0	79.04	14	1	0
3	1	14	17	3	0	0	0	45.59	34	5	-1	160	0	96	0	5.28	14	0	0
3	1	14	18	2	0	0	0	140.9	65	5	-1	90.01	0	76	0	96.28	14	0	0
3	1	14	19	4	0	0	0	145.75	30	5	-1	0	0	81.5	0	33.83	14	0	0
3	1	14	20	5	0	0	0	136.45	83	5	-1	172	9.25	83	0	92.25	14	1	0
3	1	15	1	5	0	0	0	141.96	42.03	5	-1	70	0	80	0	47.03	15	0	0
3	1	15	2	2	0	0	0	126.12	61.06	5	-1	70	10	61.06	0	71.06	15	1	0
3	1	15	3	1	0	0	0	112.1	70	5	-1	75	8.28	70	0	78.28	15	1	0
3	1	15	4	5	0	0	0	134.31	50	5	-1	0	0	80	0	60.35	15	0	0
3	1	15	5	2	0	0	0	202.42	50	5	-1	234.76	0	61.06	0	61.57	15	0	0
3	1	15	6	4	0	0	0	101.01	2.03	5	-1	62.06	0	73.8	0	2.36	15	0	0
3	1	15	7	1	0	0	0	117	55	5	-1	177.28	0	70	0	60.5	15	0	0
3	1	15	8	1	0	0	0	149.03	62.5	5	-1	80	0	70	0	70.32	15	0	0
3	1	15	9	4	0	0	0	125.79	73.8	5	-1	187	7.19	73.8	0	80.99	15	1	0
3	1	15	10	3	0	0	0	107.72	22	5	-1	99	0	89	0	28.57	15	0	0
3	1	15	11	3	0	0	0	108.41	89	5	-1	90	1.58	89	0	90.58	15	1	0
3	1	15	12	5	0	0	0	149.27	80	5	-1	155	3.77	80	0	83.77	15	1	0
3	1	15	13	4	0	0	0	143.15	72.02	5	-1	125.66	0	73.8	0	91.74	15	0	0
3	1	15	14	3	0	0	0	141.2	1	5	-1	68	0	89	0	1.98	15	0	0
3	1	15	15	2	0	0	0	85.41	30.52	5	-1	0	0	61.06	0	22.52	15	0	0
3	1	15	16	1	0	0	0	141.79	38.41	5	-1	62.34	0	70	0	43.61	15	0	0
3	1	15	17	3	0	0	0	45.59	65	5	-1	160	0	89	0	34.41	15	0	0
3	1	15	18	2	0	0	0	140.9	60	5	-1	90.01	0	61.06	0	64.02	15	0	0
3	1	15	19	4	0	0	0	145.75	45	5	-1	0	0	73.8	0	51.33	15	0	0
3	1	15	20	5	0	0	0	136.45	75	5	-1	172	0	80	0	78	15	0	0
3	1	16	1	5	0	0	0	141.96	20.78	5	-1	70	0	90	0	22.78	16	0	0
3	1	16	2	2	0	0	0	126.12	24.38	5	-1	70	0	85	0	25.38	16	0	0
3	1	16	3	1	0	0	0	112.1	40	5	-1	75	0	70	0	44.99	16	0	0
3	1	16	4	5	0	0	0	134.31	16	5	-1	0	0	90	0	17.35	16	0	0
3	1	16	5	2	0	0	0	213.18	85	5	-1	234.76	10.76	85	0	95.76	16	1	0
3	1	16	6	4	0	0	0	101.01	61.05	5	-1	62.06	0	63	0	62.06	16	0	0
3	1	16	7	1	0	0	0	128.23	70	5	-1	177.28	11.23	70	0	81.23	16	1	0
3	1	16	8	1	0	0	0	149.03	40.8	5	-1	80	0	70	0	43.25	16	0	0
3	1	16	9	4	0	0	0	125.79	52.6	5	-1	187	0	63	0	54.25	16	0	0
3	1	16	10	3	0	0	0	107.72	36	5	-1	99	0	89	0	40.92	16	0	0
3	1	16	11	3	0	0	0	108.41	24	5	-1	90	0	89	0	25.47	16	0	0
3	1	16	12	5	0	0	0	149.27	35	5	-1	155	0	90	0	35.24	16	0	0
3	1	16	13	4	0	0	0	150.1	63	5	-1	125.66	6.95	63	0	69.95	16	1	0
3	1	16	14	3	0	0	0	141.2	20	5	-1	68	0	89	0	23.85	16	0	0
3	1	16	15	2	0	0	0	85.41	52	5	-1	0	0	85	0	49.15	16	0	0
3	1	16	16	1	0	0	0	141.79	35.15	5	-1	62.34	0	70	0	38.08	16	0	0
3	1	16	17	3	0	0	0	2.95001	89	5	-1	160	-42.64	89	0	46.36	16	1	0
3	1	16	18	2	0	0	0	140.9	41.44	5	-1	90.01	0	85	0	41.44	16	0	0
3	1	16	19	4	0	0	0	145.75	45	5	-1	0	0	63	0	53.37	16	0	0
3	1	16	20	5	0	0	0	144.01	90	5	-1	172	7.56	90	0	97.56	16	1	0
3	1	17	1	5	0	0	0	149	63.5	5	-1	70	7.04	63.5	0	70.54	17	1	0
3	1	17	2	2	0	0	0	126.12	68	5	-1	70	0	77.51	0	73.09	17	0	0
3	1	17	3	1	0	0	0	112.1	10	5	-1	75	0	50.01	0	13.74	17	0	0
3	1	17	4	5	0	0	0	134.31	28	5	-1	0	0	63.5	0	31.1	17	0	0
3	1	17	5	2	0	0	0	213.18	38.03	5	-1	234.76	0	77.51	0	39.03	17	0	0
3	1	17	6	4	0	0	0	101.01	35.75	5	-1	62.06	0	70	0	36.04	17	0	0
3	1	17	7	1	0	0	0	128.23	37	5	-1	177.28	0	50.01	0	42.98	17	0	0
3	1	17	8	1	0	0	0	154.55	50.01	5	-1	80	5.52	50.01	0	55.53	17	1	0
3	1	17	9	4	0	0	0	125.79	41.6	5	-1	187	0	70	0	42.52	17	0	0
3	1	17	10	3	0	0	0	107.72	52	5	-1	99	0	65	0	55.62	17	0	0
3	1	17	11	3	0	0	0	108.41	37	5	-1	90	0	65	0	38.61	17	0	0
3	1	17	12	5	0	0	0	149.27	30	5	-1	155	0	63.5	0	26.95	17	0	0
3	1	17	13	4	0	0	0	150.1	11	5	-1	125.66	0	70	0	17.69	17	0	0
3	1	17	14	3	0	0	0	141.2	55	5	-1	68	0	65	0	62.88	17	0	0
3	1	17	15	2	0	0	0	85.41	72.19	5	-1	0	0	77.51	0	44.19	17	0	0
3	1	17	16	1	0	0	0	141.79	26.12	5	-1	62.34	0	50.01	0	27.12	17	0	0
3	1	17	17	3	0	0	1	100	65	5	-1	160	-9.94	65	0	55.06	17	1	0
3	1	17	18	2	0	0	0	159.28	77.51	5	-1	90.01	18.38	77.51	0	95.89	17	1	0
3	1	17	19	4	0	0	0	166.68	70	5	-1	0	20.93	70	0	90.93	17	1	0
3	1	17	20	5	0	0	0	144.01	5	5	-1	172	0	63.5	0	8.18	17	0	0
3	1	18	1	5	0	0	0	149	67	5	-1	70	0	83	0	77.82	18	0	0
3	1	18	2	2	0	0	0	126.12	63.02	5	-1	70	0	98	0	68.34	18	0	0
3	1	18	3	1	0	0	0	119.42	70	5	-1	75	7.32	70	0	77.32	18	1	0
3	1	18	4	5	0	0	0	134.31	30	5	-1	0	0	83	0	32.11	18	0	0
3	1	18	5	2	0	0	0	213.18	33	5	-1	234.76	0	98	0	34.08	18	0	0
3	1	18	6	4	0	0	0	102.72	73.26	5	-1	62.06	1.71	73.26	0	74.97	18	1	0
3	1	18	7	1	0	0	0	128.23	50.08	5	-1	177.28	0	70	0	56.08	18	0	0
3	1	18	8	1	0	0	0	154.55	6.85	5	-1	80	0	70	0	7.75	18	0	0
3	1	18	9	4	0	0	0	125.79	60.99	5	-1	187	0	73.26	0	65.26	18	0	0
3	1	18	10	3	0	0	0	107.72	72.01	5	-1	99	0	75	0	76.08	18	0	0
3	1	18	11	3	0	0	0	108.41	0.75	5	-1	90	0	75	0	0.98	18	0	0
3	1	18	12	5	0	0	0	149.27	35	5	-1	155	0	83	0	38.24	18	0	0
3	1	18	13	4	0	0	0	150.1	50.02	5	-1	125.66	0	73.26	0	58.37	18	0	0
3	1	18	14	3	0	0	0	149.29	75	5	-1	68	8.09	75	0	83.09	18	1	0
3	1	18	15	2	0	0	0	83.95	98	5	-1	0	-1.46	98	0	96.54	18	1	0
3	1	18	16	1	0	0	0	141.79	10	5	-1	62.34	0	70	0	10.85	18	0	0
3	1	18	17	3	0	0	1	100	20	5	-1	160	0	75	0	11.81	18	0	0
3	1	18	18	2	0	0	0	159.28	60.01	5	-1	90.01	0	98	0	63.07	18	0	0
3	1	18	19	4	0	0	0	166.68	27.9	5	-1	0	0	73.26	0	27.89	18	0	0
3	1	18	20	5	0	0	0	148.8	83	5	-1	172	4.79	83	0	87.79	18	1	0
3	1	19	1	5	0	0	0	149	8	5	-1	70	0	42.86	0	8.49	19	0	0
3	1	19	2	2	0	0	0	126.12	74.23	5	-1	70	0	77.65	0	81.23	19	0	0
3	1	19	3	1	0	0	0	119.42	15	5	-1	75	0	79	0	18.6	19	0	0
3	1	19	4	5	0	0	0	134.31	18	5	-1	0	0	42.86	0	19.27	19	0	0
3	1	19	5	2	0	0	0	213.18	2.95	5	-1	234.76	0	77.65	0	3.35	19	0	0
3	1	19	6	4	0	0	0	102.72	20	5	-1	62.06	0	54.6	0	21.04	19	0	0
3	1	19	7	1	0	0	0	144.41	79	5	-1	177.28	16.18	79	0	95.18	19	1	0
3	1	19	8	1	0	0	0	154.55	56	5	-1	80	0	79	0	61.76	19	0	0
3	1	19	9	4	0	0	0	128.05	54.6	5	-1	187	2.26	54.6	0	56.86	19	1	0
3	1	19	10	3	0	0	0	107.72	33.42	5	-1	99	0	56	0	37.42	19	0	0
3	1	19	11	3	0	0	0	108.41	7.5	5	-1	90	0	56	0	7.78	19	0	0
3	1	19	12	5	0	0	0	149.27	42.86	5	-1	155	0	42.86	0	42.86	19	1	0
3	1	19	13	4	0	0	0	150.1	39	5	-1	125.66	0	54.6	0	42.5	19	0	0
3	1	19	14	3	0	0	0	149.29	40	5	-1	68	0	56	0	48.4	19	0	0
3	1	19	15	2	0	0	0	83.95	38.7	5	-1	0	0	77.65	0	38.72	19	0	0
3	1	19	16	1	0	0	0	141.79	61.35	5	-1	62.34	0	79	0	86.96	19	0	0
3	1	19	17	3	0	0	1	72.66	56	5	-1	160	-27.34	56	0	28.66	19	1	0
3	1	19	18	2	0	0	0	170.39	77.65	5	-1	90.01	11.11	77.65	0	88.76	19	1	0
3	1	19	19	4	0	0	0	166.68	50	5	-1	0	0	54.6	0	57.9	19	0	0
3	1	19	20	5	0	0	0	148.8	8	5	-1	172	0	42.86	0	10.63	19	0	0
3	1	20	1	5	0	0	0	149	11	5	-1	70	0	72	0	11.5	20	0	0
3	1	20	2	2	0	0	0	126.12	2	5	-1	70	0	91	0	2.96	20	0	0
3	1	20	3	1	0	0	0	128.53	85	5	-1	75	9.11	85	0	94.11	20	1	0
3	1	20	4	5	0	0	0	143.83	72	5	-1	0	9.52	72	0	81.52	20	1	0
3	1	20	5	2	0	0	0	213.18	30	5	-1	234.76	0	91	0	33.91	20	0	0
3	1	20	6	4	0	0	0	102.72	1.5	5	-1	62.06	0	77.6	0	1.63	20	0	0
3	1	20	7	1	0	0	0	144.41	50.38	5	-1	177.28	0	85	0	54.38	20	0	0
3	1	20	8	1	0	0	0	154.55	82	5	-1	80	0	85	0	95.17	20	0	0
3	1	20	9	4	0	0	0	144.99	77.6	5	-1	187	16.94	77.6	0	94.54	20	1	0
3	1	20	10	3	0	0	0	111.72	31.98	5	-1	99	4	31.98	0	35.98	20	1	0
3	1	20	11	3	0	0	0	108.41	13	5	-1	90	0	31.98	0	14.3	20	0	0
3	1	20	12	5	0	0	0	149.27	70	5	-1	155	0	72	0	76.85	20	0	0
3	1	20	13	4	0	0	0	150.1	76.02	5	-1	125.66	0	77.6	0	91.84	20	0	0
3	1	20	14	3	0	0	0	149.29	22	5	-1	68	0	31.98	0	24.28	20	0	0
3	1	20	15	2	0	0	0	84.55	91	5	-1	0	0.599998	91	0	91.6	20	1	0
3	1	20	16	1	0	0	0	141.79	27.65	5	-1	62.34	0	85	0	32.92	20	0	0
3	1	20	17	3	0	0	1	72.66	29	5	-1	160	0	31.98	0	28.36	20	0	0
3	1	20	18	2	0	0	0	170.39	2	5	-1	90.01	0	91	0	2.26	20	0	0
3	1	20	19	4	0	0	0	166.68	10	5	-1	0	0	77.6	0	24.39	20	0	0
3	1	20	20	5	0	0	0	148.8	14	5	-1	172	0	72	0	17.29	20	0	0
3	1	21	1	5	0	0	0	149	76.82	5	-1	70	0	83	0	77.82	18	0	1
3	1	21	2	2	0	0	0	126.12	65	5	-1	70	0	96	0	68.34	18	0	1
3	1	21	3	1	0	0	0	135.85	70	5	-1	145	7.32	70	0	77.32	18	1	1
3	1	21	4	5	0	0	0	143.83	55	5	-1	0	0	83	0	32.11	18	0	1
3	1	21	5	2	0	0	0	213.18	34	5	-1	234.76	0	96	0	34.08	18	0	1
3	1	21	6	4	0	0	0	102.72	74.97	5	-1	137.03	0	74.97	0	74.97	18	1	1
3	1	21	7	1	0	0	0	144.41	56.08	5	-1	177.28	0	70	0	56.08	18	0	1
3	1	21	8	1	0	0	0	154.55	7.5	5	-1	80	0	70	0	7.75	18	0	1
3	1	21	9	4	0	0	0	144.99	63.5	5	-1	187	0	74.97	0	65.26	18	0	1
3	1	21	10	3	0	0	0	111.73	76.07	5	-1	175.07	0.010002	76.07	0	76.08	18	1	1
3	1	21	11	3	0	0	0	108.41	0.95	5	-1	90	0	76.07	0	0.98	18	0	1
3	1	21	12	5	0	0	0	149.27	38.24	5	-1	155	0	83	0	38.24	18	0	1
3	1	21	13	4	0	0	0	150.1	55	5	-1	125.66	0	74.97	0	58.37	18	0	1
3	1	21	14	3	0	0	0	149.29	70	5	-1	68	0	76.07	0	83.09	18	0	1
3	1	21	15	2	0	0	0	85.09	96	5	-1	96	0.540001	96	0	96.54	18	1	1
3	1	21	16	1	0	0	0	141.79	10	5	-1	62.34	0	70	0	10.85	18	0	1
3	1	21	17	3	0	0	1	72.66	12	5	-1	160	0	76.07	0	11.81	18	0	1
3	1	21	18	2	0	0	0	170.39	63.07	5	-1	90.01	0	96	0	63.07	18	0	1
3	1	21	19	4	0	0	0	166.68	25	5	-1	0	0	74.97	0	27.89	18	0	1
3	1	21	20	5	0	0	0	153.59	83	5	-1	255	4.79	83	0	87.79	18	1	1
3	1	22	1	5	0	0	0	149	39.13	5	-1	70	0	100	0	39.13	11	0	1
3	1	22	2	2	0	0	0	126.12	25	5	-1	70	0	78	0	25.84	11	0	1
3	1	22	3	1	0	0	0	136.39	80	5	-1	225	0.540001	80	0	80.54	11	1	1
3	1	22	4	5	0	0	0	129.24	100	5	-1	100	-14.59	100	0	85.41	11	1	1
3	1	22	5	2	0	0	0	213.18	5	5	-1	234.76	0	78	0	4.07	11	0	1
3	1	22	6	4	0	0	0	102.72	24.39	5	-1	137.03	0	50	0	24.39	11	0	1
3	1	22	7	1	0	0	0	144.41	45.29	5	-1	177.28	0	80	0	45.29	11	0	1
3	1	22	8	1	0	0	0	154.55	20	5	-1	80	0	80	0	20.41	11	0	1
3	1	22	9	4	0	0	0	144.99	9.21	5	-1	187	0	50	0	9.21	11	0	1
3	1	22	10	3	0	0	0	111.73	8.2	5	-1	175.07	0	50	0	8.21	11	0	1
3	1	22	11	3	0	0	0	108.41	35.98	5	-1	90	0	50	0	36.21	11	0	1
3	1	22	12	5	0	0	0	149.27	65	5	-1	155	0	100	0	66.73	11	0	1
3	1	22	13	4	0	0	0	150.1	10	5	-1	125.66	0	50	0	13.51	11	0	1
3	1	22	14	3	0	0	0	157.33	50	5	-1	118	8.04	50	0	58.04	11	1	1
3	1	22	15	2	0	0	0	86.66	78	5	-1	174	1.57	78	0	79.57	11	1	1
3	1	22	16	1	0	0	0	141.79	18.52	5	-1	62.34	0	80	0	21.85	11	0	1
3	1	22	17	3	0	0	1	72.66	10	5	-1	160	0	50	0	2.34	11	0	1
3	1	22	18	2	0	0	0	170.39	15.93	5	-1	90.01	0	78	0	15.93	11	0	1
3	1	22	19	4	0	0	0	173.31	50	5	-1	50	6.63	50	0	56.63	11	1	1
3	1	22	20	5	0	0	0	153.59	11	5	-1	255	0	100	0	15.07	11	0	1
3	1	23	1	5	0	0	0	149	70.54	5	-1	70	0	80	0	70.54	17	0	1
3	1	23	2	2	0	0	0	126.12	72	5	-1	70	0	78.56	0	73.09	17	0	1
3	1	23	3	1	0	0	0	136.39	13	5	-1	225	0	45	0	13.74	17	0	1
3	1	23	4	5	0	0	0	80.34	80	5	-1	180	-48.9	80	0	31.1	17	1	1
3	1	23	5	2	0	0	0	213.18	45	5	-1	234.76	0	78.56	0	39.03	17	0	1
3	1	23	6	4	0	0	0	102.72	36.04	5	-1	137.03	0	70	0	36.04	17	0	1
3	1	23	7	1	0	0	0	144.41	42.98	5	-1	177.28	0	45	0	42.98	17	0	1
3	1	23	8	1	0	0	0	165.08	45	5	-1	125	10.53	45	0	55.53	17	1	1
3	1	23	9	4	0	0	0	144.99	42.5	5	-1	187	0	70	0	42.52	17	0	1
3	1	23	10	3	0	0	0	111.73	55.61	5	-1	175.07	0	60	0	55.62	17	0	1
3	1	23	11	3	0	0	0	108.41	38	5	-1	90	0	60	0	38.61	17	0	1
3	1	23	12	5	0	0	0	149.27	50	5	-1	155	0	80	0	26.95	17	0	1
3	1	23	13	4	0	0	0	150.1	15	5	-1	125.66	0	70	0	17.69	17	0	1
3	1	23	14	3	0	0	0	157.33	52	5	-1	118	0	60	0	62.88	17	0	1
3	1	23	15	2	0	0	0	86.66	44	5	-1	174	0	78.56	0	44.19	17	0	1
3	1	23	16	1	0	0	0	141.79	23.12	5	-1	62.34	0	45	0	27.12	17	0	1
3	1	23	17	3	0	0	1	67.72	60	5	-1	220	-4.94	60	0	55.06	17	1	1
3	1	23	18	2	0	0	0	187.72	78.56	5	-1	168.57	17.33	78.56	0	95.89	17	1	1
3	1	23	19	4	0	0	0	194.24	70	5	-1	120	20.93	70	0	90.93	17	1	1
3	1	23	20	5	0	0	0	153.59	7	5	-1	255	0	80	0	8.18	17	0	1
3	1	24	1	5	0	0	0	149	90	5	-1	70	0	100	0	88.76	4	0	1
3	1	24	2	2	0	0	0	126.12	73	5	-1	70	0	75.97	0	74.77	4	0	1
3	1	24	3	1	0	0	0	136.39	35	5	-1	225	0	47	0	38.85	4	0	1
3	1	24	4	5	0	0	0	67.24	100	5	-1	280	-13.1	100	0	86.9	4	1	1
3	1	24	5	2	0	0	0	213.18	67	5	-1	234.76	0	75.97	0	73.62	4	0	1
3	1	24	6	4	0	0	0	102.72	45.01	5	-1	137.03	0	78.54	0	45.01	4	0	1
3	1	24	7	1	0	0	0	144.41	8.08	5	-1	177.28	0	47	0	8.08	4	0	1
3	1	24	8	1	0	0	0	171.38	47	5	-1	172	6.3	47	0	53.3	4	1	1
3	1	24	9	4	0	0	0	144.99	5.67	5	-1	187	0	78.54	0	5.67	4	0	1
3	1	24	10	3	0	0	0	111.74	84.28	5	-1	259.35	0.010002	84.28	0	84.29	4	1	1
3	1	24	11	3	0	0	0	108.41	55	5	-1	90	0	84.28	0	55.2	4	0	1
3	1	24	12	5	0	0	0	149.27	75	5	-1	155	0	100	0	0.15	4	0	1
3	1	24	13	4	0	0	0	160.1	78.54	5	-1	204.2	10	78.54	0	88.54	4	1	1
3	1	24	14	3	0	0	0	157.33	35	5	-1	118	0	84.28	0	40.69	4	0	1
3	1	24	15	2	0	0	0	86.66	50	5	-1	174	0	75.97	0	49.67	4	0	1
3	1	24	16	1	0	0	0	141.79	41.38	5	-1	62.34	0	47	0	49.36	4	0	1
3	1	24	17	3	0	0	1	67.72	36	5	-1	220	0	84.28	0	36	4	0	1
3	1	24	18	2	0	0	0	204.3	75.97	5	-1	244.54	16.58	75.97	0	92.55	4	1	1
3	1	24	19	4	0	0	0	194.24	5	5	-1	120	0	78.54	0	27.67	4	0	1
3	1	24	20	5	0	0	0	153.59	43	5	-1	255	0	100	0	46.7	4	0	1
3	1	25	1	5	0	0	0	149	8.49	5	-1	70	0	65	0	8.49	19	0	1
3	1	25	2	2	0	0	0	127.35	80	5	-1	150	1.23	80	0	81.23	19	1	1
3	1	25	3	1	0	0	0	136.39	18.6	5	-1	225	0	95.18	0	18.6	19	0	1
3	1	25	4	5	0	0	0	67.24	50	5	-1	280	0	65	0	19.27	19	0	1
3	1	25	5	2	0	0	0	213.18	3	5	-1	234.76	0	80	0	3.35	19	0	1
3	1	25	6	4	0	0	0	102.72	21.04	5	-1	137.03	0	55	0	21.04	19	0	1
3	1	25	7	1	0	0	0	144.41	95.18	5	-1	272.46	0	95.18	0	95.18	19	1	1
3	1	25	8	1	0	0	0	171.38	50.02	5	-1	172	0	95.18	0	61.76	19	0	1
3	1	25	9	4	0	0	0	146.85	55	5	-1	242	1.86	55	0	56.86	19	1	1
3	1	25	10	3	0	0	0	111.74	37.41	5	-1	259.35	0	43	0	37.42	19	0	1
3	1	25	11	3	0	0	0	108.41	7.78	5	-1	90	0	43	0	7.78	19	0	1
3	1	25	12	5	0	0	0	127.13	65	5	-1	220	-22.14	65	0	42.86	19	1	1
3	1	25	13	4	0	0	0	160.1	35	5	-1	204.2	0	55	0	42.5	19	0	1
3	1	25	14	3	0	0	0	162.73	43	5	-1	161	5.4	43	0	48.4	19	1	1
3	1	25	15	2	0	0	0	86.66	42	5	-1	174	0	80	0	38.72	19	0	1
3	1	25	16	1	0	0	0	141.79	68.75	5	-1	62.34	0	95.18	0	86.96	19	0	1
3	1	25	17	3	0	0	1	67.72	25	5	-1	220	0	43	0	28.66	19	0	1
3	1	25	18	2	0	0	0	204.3	78.76	5	-1	244.54	0	80	0	88.76	19	0	1
3	1	25	19	4	0	0	0	194.24	50	5	-1	120	0	55	0	57.9	19	0	1
3	1	25	20	5	0	0	0	153.59	5	5	-1	255	0	65	0	10.63	19	0	1
3	1	26	1	5	0	0	0	138.08	100	5	-1	170	-10.92	100	0	89.08	13	1	1
3	1	26	2	2	0	0	0	127.35	48	5	-1	150	0	77.59	0	55.69	13	0	1
3	1	26	3	1	0	0	0	136.39	3.27	5	-1	225	0	51.09	0	3.27	13	0	1
3	1	26	4	5	0	0	0	67.24	68	5	-1	280	0	100	0	33.15	13	0	1
3	1	26	5	2	0	0	0	213.18	52	5	-1	234.76	0	77.59	0	57.08	13	0	1
3	1	26	6	4	0	0	0	102.72	61.04	5	-1	137.03	0	68	0	61.04	13	0	1
3	1	26	7	1	0	0	0	144.41	51.09	5	-1	323.55	0	51.09	0	51.09	13	1	1
3	1	26	8	1	0	0	0	171.38	28.01	5	-1	172	0	51.09	0	32.19	13	0	1
3	1	26	9	4	0	0	0	146.85	55.5	5	-1	242	0	68	0	57.71	13	0	1
3	1	26	10	3	0	0	0	111.74	15.47	5	-1	259.35	0	90.5	0	15.48	13	0	1
3	1	26	11	3	0	0	0	110.72	90.5	5	-1	180.5	2.31	90.5	0	92.81	13	1	1
3	1	26	12	5	0	0	0	127.13	25	5	-1	220	0	100	0	20.4	13	0	1
3	1	26	13	4	0	0	0	168.87	68	5	-1	272.2	8.77	68	0	76.77	13	1	1
3	1	26	14	3	0	0	0	162.73	66	5	-1	161	0	90.5	0	76.84	13	0	1
3	1	26	15	2	0	0	0	86.66	40	5	-1	174	0	77.59	0	11.26	13	0	1
3	1	26	16	1	0	0	0	141.79	46.54	5	-1	62.34	0	51.09	0	55.43	13	0	1
3	1	26	17	3	0	0	1	67.72	35	5	-1	220	0	90.5	0	38.8	13	0	1
3	1	26	18	2	0	0	0	204.3	77.59	5	-1	322.13	0	77.59	0	77.59	13	1	1
3	1	26	19	4	0	0	0	194.24	11.83	5	-1	120	0	68	0	11.83	13	0	1
3	1	26	20	5	0	0	0	153.59	1	5	-1	255	0	100	0	2.09	13	0	1
3	1	27	1	5	0	0	0	138.08	50	5	-1	170	0	100	0	50.15	12	0	1
3	1	27	2	2	0	0	0	132.53	85	5	-1	235	5.18	85	0	90.18	12	1	1
3	1	27	3	1	0	0	0	136.39	15	5	-1	225	0	62.5	0	1.76	12	0	1
3	1	27	4	5	0	0	0	24.6	100	5	-1	380	-42.64	100	0	57.36	12	1	1
3	1	27	5	2	0	0	0	213.18	35	5	-1	234.76	0	85	0	34.8	12	0	1
3	1	27	6	4	0	0	0	102.72	33.83	5	-1	137.03	0	89.44	0	33.83	12	0	1
3	1	27	7	1	0	0	0	144.41	9.63	5	-1	323.55	0	62.5	0	9.63	12	0	1
3	1	27	8	1	0	0	0	175.12	62.5	5	-1	234.5	3.74	62.5	0	66.24	12	1	1
3	1	27	9	4	0	0	0	146.85	36.63	5	-1	242	0	89.44	0	36.63	12	0	1
3	1	27	10	3	0	0	0	111.74	26.27	5	-1	259.35	0	85	0	26.28	12	0	1
3	1	27	11	3	0	0	0	110.72	40.7	5	-1	180.5	0	85	0	40.74	12	0	1
3	1	27	12	5	0	0	0	127.13	70	5	-1	220	0	100	0	72.23	12	0	1
3	1	27	13	4	0	0	0	168.87	60.2	5	-1	272.2	0	89.44	0	69.39	12	0	1
3	1	27	14	3	0	0	0	174.83	85	5	-1	246	12.1	85	0	97.1	12	1	1
3	1	27	15	2	0	0	0	86.66	52	5	-1	174	0	85	0	32.6	12	0	1
3	1	27	16	1	0	0	0	141.79	46.96	5	-1	62.34	0	62.5	0	58.95	12	0	1
3	1	27	17	3	0	0	1	67.72	60	5	-1	220	0	85	0	77.51	12	0	1
3	1	27	18	2	0	0	0	204.3	17.34	5	-1	322.13	0	85	0	17.34	12	0	1
3	1	27	19	4	0	0	0	194.25	89.44	5	-1	209.44	0.009995	89.44	0	89.45	12	1	1
3	1	27	20	5	0	0	0	153.59	83	5	-1	255	0	100	0	88.27	12	0	1
3	1	28	1	5	0	0	0	138.08	26.26	5	-1	170	0	90	0	26.26	5	0	1
3	1	28	2	2	0	0	0	132.53	40	5	-1	235	0	78	0	45.59	5	0	1
3	1	28	3	1	0	0	0	136.39	50	5	-1	225	0	60	0	45.4	5	0	1
3	1	28	4	5	0	0	0	24.6	28.59	5	-1	380	0	90	0	28.59	5	0	1
3	1	28	5	2	0	0	0	213.18	1	5	-1	234.76	0	78	0	0.58	5	0	1
3	1	28	6	4	0	0	0	102.72	42.88	5	-1	137.03	0	70	0	42.88	5	0	1
3	1	28	7	1	0	0	0	144.41	14.91	5	-1	323.55	0	60	0	14.91	5	0	1
3	1	28	8	1	0	0	0	179.97	60	5	-1	294.5	4.85	60	0	64.85	5	1	1
3	1	28	9	4	0	0	0	146.85	21.36	5	-1	242	0	70	0	21.36	5	0	1
3	1	28	10	3	0	0	0	109.21	99.99	5	-1	359.34	-2.53	99.99	0	97.46	5	1	1
3	1	28	11	3	0	0	0	110.72	68.75	5	-1	180.5	0	99.99	0	69.95	5	0	1
3	1	28	12	5	0	0	0	128.85	90	5	-1	310	1.72	90	0	91.72	5	1	1
3	1	28	13	4	0	0	0	168.87	6	5	-1	272.2	0	70	0	8.95	5	0	1
3	1	28	14	3	0	0	0	174.83	60	5	-1	246	0	99.99	0	66.51	5	0	1
3	1	28	15	2	0	0	0	80.07	78	5	-1	252	-6.59	78	0	71.41	5	1	1
3	1	28	16	1	0	0	0	141.79	20.2	5	-1	62.34	0	60	0	23.88	5	0	1
3	1	28	17	3	0	0	1	67.72	90	5	-1	220	0	99.99	0	94.48	5	0	1
3	1	28	18	2	0	0	0	204.3	20.25	5	-1	322.13	0	78	0	20.25	5	0	1
3	1	28	19	4	0	0	0	203.92	70	5	-1	279.44	9.67	70	0	79.67	5	1	1
3	1	28	20	5	0	0	0	153.59	80	5	-1	255	0	90	0	87.12	5	0	1
3	1	29	1	5	0	0	0	138.08	11.5	5	-1	170	0	81.52	0	11.5	20	0	1
3	1	29	2	2	0	0	0	132.53	2.96	5	-1	235	0	88	0	2.96	20	0	1
3	1	29	3	1	0	0	0	135.5	95	5	-1	320	-0.89	95	0	94.11	20	1	1
3	1	29	4	5	0	0	0	24.6	81.52	5	-1	461.52	0	81.52	0	81.52	20	1	1
3	1	29	5	2	0	0	0	213.18	36	5	-1	234.76	0	88	0	33.91	20	0	1
3	1	29	6	4	0	0	0	102.72	1.63	5	-1	137.03	0	78.6	0	1.63	20	0	1
3	1	29	7	1	0	0	0	144.41	54.38	5	-1	323.55	0	95	0	54.38	20	0	1
3	1	29	8	1	0	0	0	179.97	85	5	-1	294.5	0	95	0	95.17	20	0	1
3	1	29	9	4	0	0	0	162.79	78.6	5	-1	320.6	15.94	78.6	0	94.54	20	1	1
3	1	29	10	3	0	0	0	109.22	35.97	5	-1	395.31	0.009998	35.97	0	35.98	20	1	1
3	1	29	11	3	0	0	0	110.72	14.25	5	-1	180.5	0	35.97	0	14.3	20	0	1
3	1	29	12	5	0	0	0	128.85	72	5	-1	310	0	81.52	0	76.85	20	0	1
3	1	29	13	4	0	0	0	168.87	78	5	-1	272.2	0	78.6	0	91.84	20	0	1
3	1	29	14	3	0	0	0	174.83	24	5	-1	246	0	35.97	0	24.28	20	0	1
3	1	29	15	2	0	0	0	83.67	88	5	-1	340	3.6	88	0	91.6	20	1	1
3	1	29	16	1	0	0	0	141.79	28.54	5	-1	62.34	0	95	0	32.92	20	0	1
3	1	29	17	3	0	0	1	67.72	23	5	-1	220	0	35.97	0	28.36	20	0	1
3	1	29	18	2	0	0	0	204.3	2.26	5	-1	322.13	0	88	0	2.26	20	0	1
3	1	29	19	4	0	0	0	203.92	24.39	5	-1	279.44	0	78.6	0	24.39	20	0	1
3	1	29	20	5	0	0	0	153.59	15	5	-1	255	0	81.52	0	17.29	20	0	1
3	1	30	1	5	5.6	5.6	0	111.38	50	5	-1	220	-26.7	50	0	23.3	2	1	1
3	1	30	2	2	6.9	6.9	0	136.53	80.2	5	-1	315.2	4	80.2	0	84.2	2	1	1
3	1	30	3	1	6.8	6.8	0	135.5	17.69	5	-1	320	0	22.59	0	17.69	2	0	1
3	1	30	4	5	1.3	1.3	0	24.6	27.49	5	-1	461.52	0	50	0	2.89	2	0	1
3	1	30	5	2	10.7	10.7	0	213.18	17	5	-1	234.76	0	80.2	0	17.08	2	0	1
3	1	30	6	4	5.2	5.2	0	102.72	97.59	5	-1	234.62	0	97.59	0	97.59	2	1	1
3	1	30	7	1	7.3	7.3	0	144.41	22.59	5	-1	346.14	0	22.59	0	22.59	2	1	1
3	1	30	8	1	9	9	0	179.97	22.08	5	-1	294.5	0	22.59	0	22.08	2	0	1
3	1	30	9	4	8.2	8.2	0	162.79	54.6	5	-1	320.6	0	97.59	0	58.48	2	0	1
3	1	30	10	3	5.5	5.5	0	109.22	54.44	5	-1	395.31	0	84.75	0	54.45	2	0	1
3	1	30	11	3	5.6	5.6	0	111.41	84.75	5	-1	265.25	0.690002	84.75	0	85.44	2	1	1
3	1	30	12	5	6.5	6.5	0	128.85	28.91	5	-1	310	0	50	0	28.91	2	0	1
3	1	30	13	4	8.5	8.5	0	168.87	66	5	-1	272.2	0	97.59	0	69.42	2	0	1
3	1	30	14	3	8.8	8.8	0	174.83	15.35	5	-1	246	0	84.75	0	15.36	2	0	1
3	1	30	15	2	4.2	4.2	0	83.67	70	5	-1	340	0	80.2	0	72.27	2	0	1
3	1	30	16	1	7.1	7.1	0	141.79	9	5	-1	62.34	0	22.59	0	9.32	2	0	1
3	1	30	17	3	3.4	3.4	1	67.72	26	5	-1	220	0	84.75	0	28.63	2	0	1
3	1	30	18	2	10.3	10.3	0	204.3	25.81	5	-1	322.13	0	80.2	0	25.81	2	0	1
3	1	30	19	4	10.2	10.2	0	203.92	48.4	5	-1	279.44	0	97.59	0	48.4	2	0	1
3	1	30	20	5	7.7	7.7	0	153.59	5	5	-1	255	0	50	0	5.29	2	0	1
